# Supplementary material for: Deciphering neuronal deficit and protein profile changes in human brain organoids from patients with creatine transporter deficiency
Source: eLife. 2023 Oct 13;12:RP88459. doi: 10.7554/eLife.88459 (PMC10575631; doi:10.7554/eLife.88459)
Supplement: Supplementary file 1. [file elife-88459-supp1.xlsx]

## Sheet: Supplementary file 1
Supplementary file 1. Raw proteomic Data showing the list of proteins and their spectral counts.
	Brain organoïds
	BJ	BJ	BJ	BJ	CTD1-4	CTD1-4	CTD1-4	CTD1-4	CTD2-3	CTD2-3	CTD2-3	CTD2-3	CTD3-7	CTD3-7	CTD3-7	CTD3-7
Protein accession	BJa	BJb	BJc	BJd	CTD1_4a	CTD1_4b	CTD1_4c	CTD1_4d	CTD2_3a	CTD2_3b	CTD2_3c	CTD2_3d	CTD3_7a	CTD3_7b	CTD3_7c	CTD3_7d
MTAP2_HUMAN	0	0	0	0	104	145	103	105	35	87	96	85	87	98	118	95
MYO5A_HUMAN	0	0	0	0	43	40	43	24	21	40	30	38	18	29	22	31
CNTN1_HUMAN	0	0	0	0	33	41	41	36	32	42	31	38	31	32	17	31
STXB1_HUMAN	0	0	0	0	41	43	41	28	34	39	34	44	19	36	30	29
TAU_HUMAN	0	0	0	0	30	25	49	12	7	17	9	30	10	11	11	13
L1CAM_HUMAN	0	0	0	0	35	13	37	8	15	11	8	37	8	17	6	15
CLIP2_HUMAN	0	0	0	0	13	22	14	19	6	9	14	14	12	11	14	12
PGM2L_HUMAN	0	0	0	0	20	21	27	12	19	24	16	21	11	19	13	12
ATAT_HUMAN	0	0	0	0	17	11	24	12	7	15	16	17	14	14	17	12
MYEF2_HUMAN	0	0	0	1	14	14	18	16	15	22	16	17	12	19	20	21
GPM6A_HUMAN	0	0	0	0	13	12	15	7	12	20	9	11	10	11	12	16
E41L1_HUMAN	0	0	0	0	15	21	19	11	0	6	16	18	4	14	13	4
NEUM_HUMAN	0	0	0	0	32	26	35	22	10	17	13	30	21	19	17	18
ELAV3_HUMAN	0	0	0	0	8	10	10	12	11	14	7	9	6	15	14	12
CE170_HUMAN	0	0	0	0	12	14	16	8	1	9	11	15	9	7	14	13
IRGQ_HUMAN	0	0	0	0	13	13	18	11	11	12	11	22	9	10	15	19
FABP7_HUMAN	0	0	0	0	14	20	17	16	23	28	18	15	18	16	3	40
DPYL4_HUMAN	2	0	4	1	53	72	63	64	43	49	56	60	59	72	59	48
COR1A_HUMAN	0	0	0	0	13	11	14	6	13	14	5	15	9	7	12	14
IGSF3_HUMAN	0	0	0	0	10	11	12	6	15	16	7	6	7	4	7	12
TAGL3_HUMAN	0	0	0	0	9	9	9	5	7	7	10	8	8	15	20	5
DCLK1_HUMAN	1	2	3	1	43	36	46	28	23	36	31	35	24	34	29	27
RUFY3_HUMAN	1	0	1	1	29	34	28	31	23	22	25	28	26	21	35	25
NOVA2_HUMAN	0	0	0	0	12	11	10	7	7	10	8	13	7	7	9	7
ADDB_HUMAN	0	0	0	0	16	10	17	4	5	8	6	13	2	7	9	8
TRIM2_HUMAN	0	0	0	0	18	18	15	13	8	11	11	16	12	14	17	10
NED4L_HUMAN	0	0	0	0	17	9	14	4	9	12	8	12	5	5	8	12
STMN1_HUMAN	3	2	3	1	35	23	38	13	35	31	24	28	34	20	31	28
KIF5C_HUMAN	7	6	5	7	80	60	96	49	68	74	56	87	36	66	80	74
CXAR_HUMAN	0	0	0	0	12	9	10	4	5	6	6	15	6	8	7	5
CTND2_HUMAN	0	0	0	0	5	8	11	8	6	10	6	8	10	6	7	9
SEPT3_HUMAN	1	1	0	1	13	17	14	13	17	17	12	19	13	16	11	17
HMCS1_HUMAN	1	0	0	1	14	10	11	11	15	13	9	15	13	17	12	17
RTN1_HUMAN	0	0	0	1	12	21	11	17	8	10	16	19	20	12	16	11
SOGA3_HUMAN	0	0	0	0	8	9	10	5	9	12	6	9	2	4	7	9
GPC2_HUMAN	1	0	0	0	16	7	22	9	7	7	5	13	7	15	22	7
ELAV4_HUMAN	0	0	0	0	7	10	12	10	12	12	6	10	8	12	10	8
STX1B_HUMAN	0	0	0	0	9	11	11	6	5	8	6	5	3	7	6	9
DCX_HUMAN	3	1	6	1	45	35	47	29	27	42	32	40	28	41	41	27
PLXA1_HUMAN	0	0	0	0	16	5	16	2	3	6	4	10	3	9	6	5
NEO1_HUMAN	0	0	0	0	5	10	5	10	7	13	5	7	3	4	6	11
NBEA_HUMAN	0	2	0	1	17	2	18	4	14	31	2	13	2	5	8	29
NOVA1_HUMAN	0	0	0	0	6	16	5	7	2	3	9	6	7	8	7	2
DPYL1_HUMAN	17	13	12	18	177	165	206	139	151	169	143	199	139	169	167	144
ELAV2_HUMAN	0	0	0	0	8	9	10	9	11	10	5	8	8	9	9	6
TRIO_HUMAN	0	0	1	0	11	10	12	3	4	13	4	7	1	4	9	10
NQO1_HUMAN	2	2	0	1	9	12	16	13	5	4	17	13	14	10	12	6
MARE3_HUMAN	0	0	0	0	10	7	8	4	1	5	7	8	3	5	7	5
ATLA1_HUMAN	0	0	0	0	3	7	9	3	4	6	4	7	2	7	11	8
DPYL5_HUMAN	16	12	14	10	136	119	131	100	94	125	108	135	104	115	104	97
MARE2_HUMAN	0	0	0	0	6	10	9	6	6	6	6	8	5	8	7	5
AK1C1_HUMAN	0	0	2	0	11	7	10	9	10	5	8	9	7	8	9	6
SRGP2_HUMAN	0	0	1	1	9	10	13	9	5	12	5	11	9	6	5	12
GABT_HUMAN	3	0	1	1	8	22	13	18	4	8	18	8	17	14	22	7
AP180_HUMAN	0	0	0	0	6	10	10	6	5	6	7	4	4	7	5	8
SYT1_HUMAN	0	0	0	0	7	8	6	2	9	9	3	5	1	1	4	11
BACH_HUMAN	3	1	2	2	30	26	31	26	18	20	27	31	27	26	23	17
PRR36_HUMAN	0	0	0	0	8	6	12	3	3	7	2	10	1	5	5	3
GHC1_HUMAN	1	0	0	0	5	8	4	7	7	8	5	6	5	5	6	11
MECP2_HUMAN	0	0	0	0	5	11	6	8	4	5	10	4	0	7	10	8
KI21A_HUMAN	0	0	0	0	9	7	6	2	4	5	6	9	1	6	3	6
PLXA4_HUMAN	0	0	0	0	5	6	9	3	6	6	3	6	3	5	6	5
DCLK2_HUMAN	0	0	1	0	5	12	7	7	3	3	9	6	6	6	9	1
TM35A_HUMAN	0	0	0	0	8	10	9	3	2	6	2	7	0	4	7	5
KAP3_HUMAN	3	3	2	4	35	30	34	20	27	30	28	37	13	24	31	28
LRC40_HUMAN	0	1	0	0	14	6	11	9	11	15	8	10	10	12	7	11
BASP1_HUMAN	9	4	6	5	52	56	55	42	44	49	46	52	52	44	46	43
CLAP2_HUMAN	0	2	0	0	15	10	15	5	7	12	9	13	7	11	11	9
NUDT3_HUMAN	0	0	0	0	6	5	5	3	5	8	3	2	4	6	6	8
CBSL_HUMAN	0	0	0	0	0	2	2	3	15	9	2	1	9	3	4	12
THS7A_HUMAN	0	0	0	0	0	7	0	2	11	9	2	0	2	4	11	13
NCAN_HUMAN	0	0	0	0	3	7	1	8	4	2	12	6	11	3	2	2
L2GL1_HUMAN	1	1	0	1	5	26	14	15	13	14	22	8	23	19	17	18
MSH6_HUMAN	0	0	0	0	4	3	7	2	10	9	2	1	2	6	6	5
AK1C2_HUMAN	0	0	2	0	7	9	7	7	7	5	7	8	5	8	8	6
ANK2_HUMAN	3	3	2	5	42	38	50	12	10	16	15	46	9	25	13	12
SNAB_HUMAN	0	0	0	0	6	7	9	6	7	4	4	6	3	6	3	7
KLC1_HUMAN	2	2	3	7	25	24	25	17	20	25	25	28	18	27	31	27
WDR47_HUMAN	0	0	0	0	7	7	5	3	3	6	7	4	2	3	4	6
HCFC1_HUMAN	1	0	0	1	5	8	10	6	7	11	8	4	5	10	10	8
VAMP2_HUMAN	0	0	0	0	9	8	8	5	3	8	6	7	2	7	8	6
SYN3_HUMAN	0	0	0	0	4	6	7	2	5	8	3	5	1	4	4	5
GSK3B_HUMAN	1	1	0	1	6	9	9	8	8	8	6	7	6	7	10	6
DPYL3_HUMAN	38	26	20	33	244	246	265	191	177	194	229	268	207	237	225	160
GDAP1_HUMAN	0	0	0	0	5	6	5	6	6	7	6	4	4	8	4	5
MAP1B_HUMAN	44	25	13	37	259	273	250	258	180	254	273	262	263	263	214	250
SYN1_HUMAN	0	0	0	0	5	7	6	4	3	6	5	4	2	3	3	5
CHSP1_HUMAN	0	0	0	0	2	3	4	3	5	5	6	3	4	4	7	8
MAP6_HUMAN	0	0	0	0	7	6	11	4	0	1	5	7	5	6	2	0
AGAP3_HUMAN	0	0	0	0	5	5	5	4	5	5	3	6	2	4	5	5
E41L3_HUMAN	2	0	2	0	2	3	3	1	14	32	2	8	2	2	4	34
AINX_HUMAN	18	14	14	20	192	148	180	128	38	74	129	201	134	148	112	54
CNTN2_HUMAN	0	0	0	0	5	8	3	9	1	0	17	5	12	10	14	0
CYRIA_HUMAN	0	0	0	0	2	3	4	3	16	13	2	1	1	2	3	13
GSK3A_HUMAN	0	0	0	0	3	4	6	2	5	6	2	4	4	5	6	3
GNAO_HUMAN	7	4	4	4	43	42	47	28	42	48	34	38	25	35	36	48
AK1C3_HUMAN	0	0	1	0	7	3	8	6	6	3	6	7	3	6	6	4
RIR1_HUMAN	0	0	0	1	1	1	3	8	9	5	6	1	7	8	9	3
PHIPL_HUMAN	0	0	0	0	2	8	1	6	1	2	6	0	5	7	9	1
CAMKV_HUMAN	0	0	0	0	3	1	2	0	12	17	1	3	0	1	0	10
PGCB_HUMAN	0	0	0	0	1	10	0	10	0	0	12	1	16	0	0	0
DC1L1_HUMAN	1	2	1	2	11	8	12	9	7	12	6	14	7	11	13	8
SUGP2_HUMAN	1	0	0	0	8	7	15	6	5	7	5	11	4	9	8	7
SRGP3_HUMAN	0	0	0	0	8	6	5	7	4	5	4	5	5	4	4	2
RHOB_HUMAN	0	0	1	0	8	6	5	3	4	6	5	5	3	2	5	6
GNAZ_HUMAN	0	0	0	0	6	5	6	1	3	5	4	6	3	1	4	4
AFAD_HUMAN	0	0	0	0	7	3	4	1	5	3	0	4	2	5	5	8
CKAP5_HUMAN	3	5	3	6	25	25	29	28	28	31	23	28	26	32	31	31
HSDL1_HUMAN	3	0	1	1	10	11	11	11	10	18	9	11	11	11	11	13
PP2BA_HUMAN	1	1	1	1	9	14	10	13	14	23	12	9	10	10	12	15
NCAM1_HUMAN	14	10	13	15	93	85	109	67	66	73	74	94	62	77	70	82
RAB3A_HUMAN	1	0	0	3	13	13	14	8	14	15	13	10	10	12	15	12
PLXA2_HUMAN	0	0	0	0	3	4	4	2	5	5	2	4	2	3	5	5
VAMP3_HUMAN	0	0	0	0	6	5	5	3	2	6	5	5	2	5	6	4
SRC_HUMAN	0	1	2	3	13	11	12	7	18	18	8	12	7	11	14	16
RHG35_HUMAN	1	0	0	0	11	6	5	5	3	8	3	8	3	4	5	5
SH3G2_HUMAN	0	0	0	0	2	4	3	2	9	8	4	1	3	3	1	6
DPYL2_HUMAN	37	33	31	35	215	227	231	177	175	194	193	239	183	231	195	179
SRR_HUMAN	0	0	0	0	3	9	4	4	3	3	5	3	3	1	2	5
NCDN_HUMAN	1	0	0	1	8	6	4	5	7	7	2	7	3	2	4	6
LIPA3_HUMAN	0	0	0	0	8	3	8	3	2	4	2	5	0	3	5	1
GNAQ_HUMAN	3	1	1	0	14	10	12	8	9	13	8	12	9	8	13	12
EAA1_HUMAN	0	0	0	0	0	8	0	10	2	3	11	3	10	4	3	4
RB6I2_HUMAN	0	0	0	0	5	6	5	3	6	8	6	5	2	4	3	7
COR2B_HUMAN	0	0	0	0	1	2	0	2	8	12	3	0	2	0	2	10
MARK3_HUMAN	0	0	0	0	3	6	4	4	2	2	4	6	2	2	4	3
MIRO1_HUMAN	1	0	0	0	6	5	4	5	6	7	4	4	3	4	4	5
MARK1_HUMAN	0	0	0	0	4	5	2	3	4	6	1	5	0	0	5	6
SHOT1_HUMAN	1	0	0	0	4	3	4	1	5	11	1	5	2	2	1	9
SPTN2_HUMAN	3	2	1	5	19	15	29	15	24	29	17	15	12	22	15	22
GD1L1_HUMAN	0	0	0	0	5	5	4	3	3	4	3	4	1	3	4	1
CADH2_HUMAN	0	0	0	0	3	6	4	6	3	3	5	4	5	5	1	4
MCM4_HUMAN	0	1	1	2	2	0	6	3	19	15	2	1	4	6	4	11
ZC21A_HUMAN	0	0	0	0	7	3	7	2	1	2	2	3	1	7	3	1
KBTBB_HUMAN	0	0	0	0	1	3	6	3	5	5	0	6	1	5	2	2
RABP1_HUMAN	18	9	10	13	16	115	36	87	14	9	112	42	97	131	54	14
PAK1_HUMAN	1	3	1	3	15	15	19	9	18	16	11	18	10	11	16	15
KIF1A_HUMAN	0	0	0	0	2	6	3	4	2	2	4	3	5	2	3	1
OSBL8_HUMAN	0	0	0	0	2	5	4	2	5	6	2	2	1	2	4	3
A4_HUMAN	0	0	0	0	5	7	11	6	1	3	8	6	4	7	3	2
STX7_HUMAN	1	0	0	0	6	6	5	3	2	4	6	7	4	3	5	2
COR1C_HUMAN	8	5	5	3	23	29	26	24	39	29	23	21	26	23	28	26
THIO_HUMAN	1	0	0	2	8	5	8	6	6	5	7	7	6	5	15	8
SARM1_HUMAN	1	0	0	0	3	4	4	3	5	4	3	6	8	5	4	4
STMN2_HUMAN	1	2	3	1	10	7	11	5	11	8	8	7	11	7	9	9
CENPV_HUMAN	1	1	1	1	12	9	14	9	17	16	12	13	9	10	14	15
LIN7C_HUMAN	0	0	0	0	5	2	5	1	3	3	4	7	4	2	3	3
ERG7_HUMAN	1	1	1	0	3	7	6	10	12	8	5	5	5	5	7	9
VATB2_HUMAN	9	5	3	8	27	24	28	22	35	34	23	29	18	29	24	33
PLXA3_HUMAN	0	0	0	0	3	2	4	4	2	2	3	5	4	2	2	2
KDIS_HUMAN	0	0	0	0	3	2	3	1	8	5	1	3	1	2	0	7
VPP1_HUMAN	2	0	0	1	8	14	12	8	6	9	12	11	4	5	5	4
DYN1_HUMAN	4	3	3	3	20	24	22	16	12	20	21	20	10	21	10	12
SMCA5_HUMAN	2	3	1	3	5	8	14	14	22	16	5	10	9	16	14	14
AGAP1_HUMAN	0	0	0	0	5	3	6	3	1	3	3	1	1	3	3	3
EPHB2_HUMAN	0	0	0	0	10	2	10	0	3	0	0	7	0	1	2	0
HINT1_HUMAN	1	0	1	1	4	4	3	3	7	4	5	4	3	4	6	8
MTMR5_HUMAN	0	0	0	0	4	2	5	3	2	4	2	4	0	3	2	3
LY6H_HUMAN	0	0	0	0	2	3	4	2	2	3	3	4	3	3	3	2
TE2IP_HUMAN	0	0	0	0	3	3	4	2	2	1	2	3	1	4	3	5
AT1B2_HUMAN	0	0	0	0	2	4	4	2	2	3	2	3	2	4	3	3
FBP1L_HUMAN	0	0	0	0	2	3	3	3	1	2	3	3	6	4	3	1
AT1A3_HUMAN	23	11	10	18	72	82	76	61	52	64	59	98	51	68	56	49
H2AW_HUMAN	6	6	9	11	37	32	47	33	30	31	33	41	31	43	43	31
TOP2A_HUMAN	1	2	2	1	7	7	15	7	14	11	5	9	6	16	10	9
KLC2_HUMAN	2	2	2	4	11	10	9	10	10	12	11	9	10	11	13	13
CBX5_HUMAN	1	0	0	1	3	2	8	2	7	4	3	5	3	5	9	5
2A5E_HUMAN	1	1	0	0	6	7	4	6	6	8	7	8	8	7	9	9
UCHL1_HUMAN	22	15	17	22	77	89	77	66	74	71	76	65	71	59	95	85
CYFP2_HUMAN	7	4	4	6	25	28	27	21	29	28	27	23	21	26	22	29
LIPA1_HUMAN	0	0	0	0	5	4	6	3	2	3	1	2	0	2	4	1
AGRG1_HUMAN	0	0	0	0	1	3	3	4	2	2	5	3	5	2	1	2
CLCA_HUMAN	0	0	0	0	3	1	2	1	3	6	2	3	2	3	4	3
RAB3D_HUMAN	1	0	0	3	10	9	11	6	11	11	10	7	7	9	12	9
MRP_HUMAN	1	0	1	3	8	7	5	5	7	10	8	8	7	8	8	10
PLPP_HUMAN	1	0	0	0	3	4	4	5	2	4	5	4	3	1	6	6
FYN_HUMAN	2	2	2	4	15	12	17	11	9	10	15	12	12	14	11	10
CA2D2_HUMAN	0	0	0	0	4	7	6	4	0	0	5	6	1	6	1	0
LIN7A_HUMAN	0	0	0	0	3	2	4	1	3	4	4	6	4	2	2	3
ARL3_HUMAN	1	1	0	1	3	2	4	4	8	7	5	2	5	1	8	9
NCKP1_HUMAN	5	1	0	3	11	13	14	9	20	16	11	12	7	11	12	13
PPM1E_HUMAN	0	0	0	0	1	4	2	3	2	3	3	1	3	2	4	4
HS74L_HUMAN	5	2	2	3	7	12	13	11	16	14	10	9	8	17	12	13
TOP2B_HUMAN	10	7	9	9	32	40	52	35	43	48	24	40	22	40	49	47
HDGR3_HUMAN	1	0	0	0	4	7	8	4	2	4	3	4	2	1	3	4
PEA15_HUMAN	2	0	0	1	3	6	4	6	7	9	7	4	7	5	12	11
PSIP1_HUMAN	4	3	3	5	13	17	20	18	20	19	14	17	21	16	16	19
FDFT_HUMAN	0	0	0	0	1	1	3	2	7	5	1	3	1	8	5	2
RTN3_HUMAN	1	1	0	2	7	6	7	5	8	6	7	8	10	8	8	6
VATH_HUMAN	0	1	0	1	5	5	5	2	6	6	3	4	1	5	4	5
ENOG_HUMAN	31	24	22	27	104	125	121	95	78	78	96	92	91	105	122	85
H1X_HUMAN	4	3	3	5	13	11	21	11	31	27	13	13	9	16	24	22
SV2A_HUMAN	0	0	0	0	3	5	2	2	1	4	2	4	0	2	3	2
SHLB2_HUMAN	0	0	0	0	1	5	3	4	0	0	3	1	5	4	2	3
GDIA_HUMAN	32	23	19	21	92	112	101	96	99	98	91	103	95	100	103	91
RAB6B_HUMAN	2	1	3	3	13	9	13	14	13	13	13	10	11	13	13	15
PLCG1_HUMAN	0	1	0	1	4	3	7	3	11	10	5	4	5	6	7	8
CTNA2_HUMAN	5	3	4	7	29	21	24	19	19	24	14	28	13	20	20	22
RAB3C_HUMAN	1	0	0	3	9	11	12	6	8	10	9	7	6	8	11	8
TP53B_HUMAN	4	4	4	3	13	19	10	19	10	8	19	14	16	12	16	10
GNAI1_HUMAN	14	7	7	6	34	39	38	36	33	38	31	36	44	36	35	40
CELF2_HUMAN	0	2	0	1	4	4	6	5	6	8	3	2	4	3	5	7
HIP1R_HUMAN	0	0	1	0	3	2	2	2	5	3	3	4	3	3	3	3
HGS_HUMAN	2	0	1	0	4	8	5	7	4	7	7	6	3	4	5	4
CYRIB_HUMAN	2	0	1	0	5	9	7	5	9	9	8	3	7	8	10	12
LIS1_HUMAN	9	7	6	11	34	36	34	30	37	40	32	32	29	28	39	36
KIF2A_HUMAN	3	1	3	4	11	11	15	10	13	20	9	13	11	14	12	11
EAA2_HUMAN	0	0	0	0	3	2	3	1	3	6	1	3	0	3	0	4
FSD1L_HUMAN	0	0	0	0	2	2	2	2	2	3	2	3	3	2	2	4
PCAT1_HUMAN	0	0	0	0	1	5	1	3	1	2	3	3	2	4	2	2
PIMT_HUMAN	3	2	1	2	10	10	9	8	9	13	11	5	8	8	14	11
CDK5_HUMAN	3	1	1	1	6	8	9	6	9	9	8	5	6	8	10	10
DCTN1_HUMAN	6	5	7	10	27	28	30	22	31	33	24	25	21	22	27	29
KLC4_HUMAN	2	1	1	1	5	7	6	6	8	7	6	7	6	9	6	7
DYN3_HUMAN	7	4	4	6	22	34	27	23	13	22	28	21	16	21	19	16
GNA14_HUMAN	2	1	2	0	8	7	8	7	8	8	6	7	8	4	9	9
KIF5A_HUMAN	7	6	5	7	23	22	32	19	24	25	23	29	16	24	31	26
GIT1_HUMAN	0	0	1	1	4	6	3	4	3	5	2	3	0	4	3	4
ACYP1_HUMAN	0	0	0	0	2	1	1	2	2	3	4	2	2	2	3	4
RBGP1_HUMAN	0	0	0	0	1	5	2	4	2	5	1	1	4	2	3	5
ZN428_HUMAN	0	0	0	0	1	1	2	2	3	0	4	1	2	2	4	4
SHPK_HUMAN	0	0	0	0	3	1	5	2	1	1	1	2	2	3	3	3
UBA6_HUMAN	2	2	2	2	5	12	5	7	14	7	7	5	8	7	12	11
DTD1_HUMAN	2	1	1	1	5	5	6	4	5	6	6	7	4	7	6	6
BAZ1B_HUMAN	0	0	0	0	1	2	3	1	3	3	3	1	1	4	3	3
RAB3B_HUMAN	0	0	0	1	5	5	7	3	5	5	5	2	3	5	5	4
PP2BB_HUMAN	0	1	1	1	6	4	4	4	7	10	4	6	6	5	6	7
NEUL_HUMAN	1	0	0	1	6	2	7	2	2	3	5	9	4	6	4	2
GEPH_HUMAN	0	0	0	0	3	3	2	1	1	3	4	3	1	3	6	3
MTA2_HUMAN	0	0	0	0	2	2	1	3	6	6	1	1	4	2	2	3
PA1B3_HUMAN	8	4	6	6	20	18	24	14	27	23	19	18	21	15	26	26
OPCM_HUMAN	0	0	0	0	1	1	1	1	5	9	0	1	0	0	0	8
NFASC_HUMAN	0	0	0	0	0	3	1	2	1	6	2	3	3	2	1	3
GBG2_HUMAN	0	0	0	0	3	3	4	2	1	2	1	3	1	2	3	2
SGPL1_HUMAN	0	0	0	0	0	4	1	5	2	1	3	1	4	2	3	1
MCM5_HUMAN	1	0	1	1	1	1	6	2	14	9	2	1	2	7	4	10
KI21B_HUMAN	2	1	2	1	10	4	9	5	5	6	4	12	4	4	8	8
	4	0	2	3	9	15	11	12	15	13	11	12	7	6	8	10
CALM1_HUMAN	7	3	3	6	15	14	16	10	19	19	17	14	9	8	26	37
OGA_HUMAN	2	3	3	3	17	20	16	17	10	11	17	18	9	19	12	7
CBX1_HUMAN	2	1	1	2	7	4	6	5	11	8	6	3	7	8	12	9
TFAM_HUMAN	1	0	0	2	2	5	4	2	5	9	7	2	4	4	6	8
HMGB2_HUMAN	7	1	4	5	13	19	17	12	27	22	14	11	15	14	24	27
RAB6A_HUMAN	3	1	3	3	14	9	13	12	15	13	11	7	12	12	14	15
TBA1A_HUMAN	218	205	209	220	738	721	797	668	694	750	675	771	701	708	736	690
DLGP4_HUMAN	0	0	0	0	2	1	4	1	2	5	2	4	2	2	5	3
VATA_HUMAN	11	9	7	8	27	36	35	28	36	37	27	41	19	36	32	36
GPM6B_HUMAN	0	0	0	0	2	2	2	3	2	3	2	2	2	2	2	2
CBPE_HUMAN	0	0	0	0	4	5	4	0	2	4	1	2	0	0	0	2
41_HUMAN	0	0	0	0	3	4	2	0	1	2	2	1	0	1	8	2
PTPRZ_HUMAN	0	0	0	0	0	2	0	5	1	1	3	1	5	1	0	7
WASF1_HUMAN	0	0	0	0	2	2	3	2	2	2	3	2	2	2	2	2
SMAP1_HUMAN	0	0	0	0	2	3	3	1	2	1	3	3	0	2	3	2
FARP1_HUMAN	0	1	0	1	8	4	5	1	2	3	6	4	1	1	1	3
CHM2A_HUMAN	0	0	0	0	1	3	2	2	2	1	3	2	3	1	4	2
GNAI2_HUMAN	16	8	11	11	34	46	44	44	42	44	37	38	61	41	45	45
UBP7_HUMAN	7	1	3	3	13	17	15	13	13	16	13	11	12	18	13	17
IPYR_HUMAN	4	4	1	3	8	13	7	13	23	16	10	5	12	14	16	23
NEDD4_HUMAN	0	0	0	0	4	2	3	2	2	3	2	3	2	2	2	3
TBB3_HUMAN	214	186	195	202	709	663	738	599	637	657	623	758	644	655	651	611
SCAM1_HUMAN	2	1	0	2	6	9	6	5	5	7	6	7	5	6	11	7
NRCAM_HUMAN	0	0	0	0	0	2	0	3	2	2	2	1	6	3	3	1
SYUA_HUMAN	0	0	0	0	1	2	4	0	1	4	2	3	0	0	3	5
GMFB_HUMAN	0	0	0	0	1	2	2	1	3	3	2	2	2	0	2	5
LSM3_HUMAN	0	0	0	0	2	2	2	0	3	3	2	2	1	1	1	4
FSD1_HUMAN	0	0	0	0	1	2	3	1	3	1	2	4	2	3	1	2
BRSK1_HUMAN	0	0	0	0	2	4	3	2	2	1	1	3	0	2	2	3
VANG2_HUMAN	0	0	0	0	2	3	5	2	2	4	0	2	1	1	2	1
ARBK1_HUMAN	0	0	0	0	3	5	3	2	2	5	3	3	2	4	2	2
LCMT1_HUMAN	0	0	0	0	2	3	0	2	3	2	4	1	2	0	3	2
ARP10_HUMAN	1	0	0	2	6	3	7	5	3	6	3	4	3	6	4	4
ADAS_HUMAN	0	0	0	1	0	3	3	2	4	2	2	5	1	3	2	2
PP1R7_HUMAN	1	1	2	1	3	7	5	2	8	7	7	5	6	4	8	8
TBA8_HUMAN	112	97	95	110	342	344	362	314	332	349	317	344	341	339	343	336
P5I11_HUMAN	0	0	0	0	1	0	3	0	4	5	0	1	0	2	1	7
SYUB_HUMAN	0	0	0	0	1	1	2	0	2	6	2	1	0	0	3	6
GDPD1_HUMAN	0	0	0	0	2	3	3	1	1	2	2	2	0	3	3	2
CNTFR_HUMAN	0	0	0	0	3	2	4	2	1	1	2	3	2	1	1	2
CADM3_HUMAN	0	0	0	0	3	2	6	0	1	3	3	3	0	1	1	1
ZN512_HUMAN	1	0	0	3	8	8	9	5	5	7	6	9	5	8	7	4
SMCA1_HUMAN	1	2	0	1	4	3	6	4	10	8	2	3	4	5	7	5
KIF1B_HUMAN	0	0	0	0	1	3	2	2	1	1	4	2	2	1	3	1
PAK2_HUMAN	4	6	5	7	13	16	25	15	26	25	16	21	19	17	22	25
PI42A_HUMAN	1	1	0	0	5	5	5	2	3	4	3	5	2	0	3	4
SCOT1_HUMAN	6	1	1	4	7	16	10	11	10	11	14	14	9	11	9	10
GNA11_HUMAN	3	2	2	1	9	9	9	7	9	9	7	8	9	6	10	10
GNAI3_HUMAN	17	9	7	7	32	39	34	35	31	35	29	32	48	35	37	37
LAP2B_HUMAN	12	6	5	6	23	25	25	23	11	20	20	23	23	27	30	24
TBA4A_HUMAN	185	179	178	186	591	570	615	534	546	589	527	605	558	562	573	552
TBB2A_HUMAN	331	289	301	295	1028	965	1101	879	963	990	929	1136	945	959	967	890
TBB2B_HUMAN	333	291	303	299	1030	966	1105	880	967	996	930	1138	949	960	974	895
LANC2_HUMAN	1	0	1	0	2	6	2	1	2	3	2	4	2	5	3	2
SRSF9_HUMAN	3	0	0	2	5	3	10	4	8	11	5	4	5	6	10	12
CLAP1_HUMAN	0	2	3	2	7	10	9	8	6	11	9	10	9	9	10	8
YLPM1_HUMAN	0	0	1	1	2	4	2	4	1	3	2	2	2	5	5	4
MA7D1_HUMAN	1	1	0	0	4	4	6	5	1	6	4	3	2	4	5	4
UBQL2_HUMAN	0	1	1	1	4	6	3	6	1	4	6	2	5	5	5	4
PTN11_HUMAN	2	1	0	1	4	6	3	6	6	7	2	1	5	2	3	6
TBA1B_HUMAN	217	207	206	220	676	641	712	598	620	675	607	704	634	639	656	626
EXOC7_HUMAN	0	0	0	0	4	0	3	1	2	4	2	2	1	1	0	3
NEGR1_HUMAN	0	0	0	0	2	2	3	1	0	5	2	2	0	0	2	4
GSTA4_HUMAN	0	0	0	0	2	2	1	1	3	2	3	2	2	1	1	3
EFNB1_HUMAN	0	0	0	0	0	3	0	0	5	5	0	0	1	1	3	5
ACL6B_HUMAN	0	0	0	0	2	2	2	2	2	2	2	3	2	2	1	1
SMRC2_HUMAN	2	1	2	5	7	10	9	9	10	16	12	9	8	15	15	9
RBM4_HUMAN	0	0	1	2	5	4	6	3	6	4	5	3	4	5	7	4
FA98B_HUMAN	2	1	1	3	4	10	8	9	9	10	9	5	9	9	10	10
TSN_HUMAN	4	1	1	2	7	12	5	8	11	8	10	4	8	9	10	8
HSP13_HUMAN	0	0	0	1	3	4	2	1	2	2	1	3	2	2	3	2
MVD1_HUMAN	0	0	0	0	3	1	3	1	5	5	0	1	1	2	2	5
ADDA_HUMAN	6	3	2	5	22	25	26	18	11	18	20	24	16	19	19	15
ENOPH_HUMAN	0	0	0	1	1	5	3	4	5	5	3	2	2	3	2	5
SARNP_HUMAN	1	1	0	1	4	4	5	2	3	3	3	6	4	3	5	4
WDR82_HUMAN	0	0	0	1	4	4	4	5	4	7	3	3	4	5	6	4
DCTN2_HUMAN	8	6	6	7	24	24	22	18	24	22	19	21	19	20	22	25
1433G_HUMAN	27	18	22	30	82	80	73	56	83	75	72	66	72	66	100	88
TWF2_HUMAN	0	0	0	0	1	2	1	2	1	1	1	0	3	2	4	3
KPCB_HUMAN	1	0	0	0	2	12	1	4	1	3	6	1	4	2	0	2
NECA2_HUMAN	0	0	0	0	6	0	6	0	0	0	0	7	0	0	3	0
SRG2B_HUMAN	0	0	1	1	4	2	5	3	1	5	3	3	3	1	2	6
SYNJ1_HUMAN	0	0	0	0	1	3	3	3	1	2	2	1	0	2	3	1
STX1A_HUMAN	0	0	0	0	3	2	3	1	2	3	1	3	0	0	2	2
MSH2_HUMAN	4	1	1	2	6	2	10	5	16	12	4	4	4	5	7	11
DYL2_HUMAN	1	0	1	1	3	3	4	3	4	4	5	3	4	4	7	5
VPS51_HUMAN	0	0	0	0	3	4	1	1	1	2	1	3	2	2	2	0
TBCB_HUMAN	7	6	4	5	17	16	19	15	14	19	18	21	16	14	19	16
CRKL_HUMAN	1	1	1	0	1	8	3	2	5	6	5	1	4	3	5	8
GET3_HUMAN	3	1	0	4	6	5	5	9	8	8	8	6	10	7	7	11
STAU2_HUMAN	0	0	0	0	2	1	1	2	1	2	2	2	2	3	3	1
MCM7_HUMAN	1	2	4	2	2	1	7	4	20	15	6	3	4	6	1	13
TTC37_HUMAN	0	0	0	0	2	1	2	1	1	2	1	1	1	0	2	5
DREB_HUMAN	9	7	11	11	24	34	23	29	26	26	35	21	38	31	31	33
MARCS_HUMAN	6	7	6	5	20	22	17	18	16	20	19	16	26	19	22	23
CSKP_HUMAN	3	2	1	2	11	16	12	9	5	9	9	10	3	5	8	9
SMCA4_HUMAN	3	0	1	3	9	5	10	6	10	11	6	5	5	9	12	8
MYO1B_HUMAN	2	0	0	1	14	4	19	5	0	0	2	11	4	9	2	0
DCTN4_HUMAN	0	1	1	1	2	2	5	2	7	6	4	7	3	5	5	7
OGT1_HUMAN	1	1	1	0	3	3	3	3	5	7	2	2	4	3	3	6
LUC7L_HUMAN	1	0	0	0	1	5	2	3	3	3	3	0	4	1	3	5
CPSF6_HUMAN	2	0	2	3	2	6	9	6	6	10	6	5	3	8	8	6
MSMO1_HUMAN	0	0	0	0	2	3	2	2	2	2	1	2	3	2	1	4
PIPNA_HUMAN	0	0	0	0	3	3	2	2	2	1	4	1	4	1	2	2
TNPO3_HUMAN	2	0	1	1	4	4	6	2	7	5	5	6	7	5	6	3
SATT_HUMAN	0	0	0	0	1	1	1	1	1	2	2	2	2	2	2	2
HOOK3_HUMAN	0	0	0	0	1	3	0	3	0	2	3	2	2	1	2	2
ABI2_HUMAN	0	0	0	0	1	3	2	1	1	2	3	2	2	1	1	2
LYPA1_HUMAN	0	0	0	0	1	1	4	0	3	2	0	3	1	2	2	2
RASA1_HUMAN	0	0	0	0	4	1	2	0	3	1	2	3	0	1	2	2
LSAMP_HUMAN	3	1	0	0	9	7	9	4	3	6	5	11	5	6	2	3
NFH_HUMAN	2	3	3	3	17	13	16	9	2	4	10	16	6	13	7	2
PI42B_HUMAN	2	2	1	0	7	8	7	4	4	5	5	7	3	1	6	7
RBM4B_HUMAN	0	0	0	1	3	2	4	2	5	2	4	2	3	2	5	2
UBE2O_HUMAN	2	2	1	3	5	6	5	6	5	7	7	6	6	7	8	7
PAK3_HUMAN	3	5	3	3	11	13	17	6	13	12	10	15	8	10	12	9
DCTN3_HUMAN	0	0	1	0	3	1	3	1	1	2	2	3	1	2	4	3
PPT1_HUMAN	0	0	1	0	1	3	1	2	3	2	2	0	2	3	3	3
HXK1_HUMAN	28	20	12	28	60	80	69	63	57	66	65	63	55	57	52	59
PYRG1_HUMAN	2	2	1	1	5	5	5	3	12	9	3	3	6	8	9	6
TEFF1_HUMAN	0	0	0	0	3	2	5	0	0	2	1	2	0	3	2	0
NTRI_HUMAN	0	0	0	0	2	3	4	0	0	1	1	6	1	0	1	1
HPF1_HUMAN	0	0	0	0	1	2	2	1	3	2	1	1	1	3	1	2
PTPRF_HUMAN	0	0	0	0	2	0	2	0	5	2	1	1	0	2	2	2
CTCF_HUMAN	0	0	0	0	1	1	2	1	5	4	1	1	0	1	1	2
TBB6_HUMAN	192	163	173	171	527	492	548	446	474	497	451	565	489	489	497	447
GNAS1_HUMAN	9	6	6	5	18	25	19	19	25	20	19	17	23	23	23	20
IPO9_HUMAN	2	3	3	1	5	6	6	8	10	5	6	7	6	6	8	9
VTA1_HUMAN	2	1	2	1	4	7	4	5	7	9	6	3	4	5	5	7
UBQL1_HUMAN	0	0	0	2	4	5	3	6	1	3	4	2	5	3	3	2
PTN_HUMAN	4	3	3	2	7	12	4	11	10	5	17	5	12	9	12	5
PTBP2_HUMAN	5	3	2	3	9	9	15	9	16	15	8	13	9	16	17	16
CDS2_HUMAN	0	0	0	0	2	3	3	1	1	2	2	5	1	2	1	2
PP4C_HUMAN	0	0	0	0	1	3	1	0	2	2	2	2	2	2	4	2
NXN_HUMAN	0	0	0	0	3	2	2	3	1	0	1	2	3	3	3	2
MYO5B_HUMAN	0	0	0	0	2	2	4	1	2	3	2	3	0	2	1	3
NCALD_HUMAN	0	0	1	0	3	3	5	2	2	2	6	3	2	2	2	3
HPCA_HUMAN	0	0	1	0	2	3	4	3	2	3	5	3	2	1	3	4
RAB37_HUMAN	0	0	0	1	4	3	4	2	4	4	3	1	2	4	4	4
EMAL1_HUMAN	0	0	0	0	1	1	1	0	6	2	0	1	0	0	0	7
AP3B2_HUMAN	1	0	0	0	2	5	3	2	1	2	3	4	0	3	2	3
INP4A_HUMAN	0	0	0	0	1	1	0	0	2	2	3	1	1	2	4	2
CIRBP_HUMAN	1	0	0	3	5	6	2	6	4	4	8	4	5	6	5	6
RELCH_HUMAN	0	0	0	0	1	1	1	1	2	5	1	1	1	1	1	3
PACS1_HUMAN	1	0	0	1	6	6	4	3	1	3	2	6	1	2	2	3
CSK_HUMAN	1	0	0	0	1	1	2	3	2	4	2	2	3	2	3	3
2A5B_HUMAN	1	0	0	0	4	4	2	2	3	3	2	5	4	4	4	2
VP33A_HUMAN	0	1	1	1	3	4	1	2	4	4	3	2	3	4	3	4
TBB5_HUMAN	361	339	342	324	944	897	1009	826	917	934	865	1047	882	919	918	847
KAPCB_HUMAN	5	3	2	5	15	12	15	10	9	12	9	17	5	8	9	11
AP1G1_HUMAN	7	1	0	4	8	14	11	14	12	13	11	9	7	10	11	12
PUR1_HUMAN	1	1	0	1	2	2	2	3	8	4	3	1	3	6	3	6
TBB4B_HUMAN	349	323	316	312	915	854	975	784	870	877	814	1002	839	868	862	798
NCBP1_HUMAN	1	0	1	0	4	4	3	3	2	3	1	3	3	3	3	3
GNA13_HUMAN	2	1	2	2	6	8	6	6	7	8	6	5	10	5	7	6
PHP14_HUMAN	0	1	0	1	3	3	3	1	4	3	3	2	1	3	3	3
TMOD2_HUMAN	0	0	0	0	4	1	4	1	3	1	1	3	1	1	2	1
AT1B3_HUMAN	1	1	2	2	5	4	5	4	3	5	6	7	4	2	2	7
LARP1_HUMAN	1	0	0	0	2	3	2	2	2	1	2	2	2	2	2	1
KPCA_HUMAN	1	1	0	1	2	5	1	5	7	9	6	2	4	1	0	7
GTPB1_HUMAN	2	1	1	0	3	5	4	4	5	5	1	3	2	4	2	2
DNM1L_HUMAN	10	6	5	5	15	17	17	14	15	24	13	17	11	14	23	21
CRIP2_HUMAN	4	2	4	5	11	11	11	12	8	10	12	12	12	8	10	13
EXC6B_HUMAN	1	0	0	1	1	2	1	1	1	4	3	3	3	3	3	2
THIC_HUMAN	4	4	6	5	12	11	16	11	28	18	15	13	7	6	11	12
FABP5_HUMAN	4	4	2	3	3	3	5	2	20	19	4	5	7	8	9	23
LAT1_HUMAN	0	0	0	0	1	2	1	1	1	1	1	2	1	4	2	1
CADM4_HUMAN	0	0	0	0	0	2	0	1	3	3	2	0	1	1	1	3
DCAF7_HUMAN	0	0	0	0	0	1	1	1	2	2	1	0	2	3	2	2
CAPR1_HUMAN	3	2	2	2	6	9	7	6	8	6	4	7	4	4	9	8
ROCK2_HUMAN	0	0	0	0	0	1	2	0	4	4	0	0	0	0	0	6
BRAF_HUMAN	0	0	0	0	1	0	2	3	3	0	2	2	1	1	2	1
PTMS_HUMAN	0	0	0	0	1	1	1	1	4	1	1	1	3	1	1	1
1433F_HUMAN	16	10	14	15	46	40	32	31	36	46	40	34	37	34	47	46
XPO7_HUMAN	1	0	0	1	2	4	6	5	5	5	1	4	2	8	6	6
SEPT5_HUMAN	3	3	4	5	13	8	11	8	11	13	7	9	6	9	7	12
TBA1C_HUMAN	170	162	159	159	436	398	457	391	400	431	397	469	426	411	417	400
IQEC1_HUMAN	0	0	0	0	2	3	3	1	1	2	2	1	1	2	2	2
RAC3_HUMAN	4	3	3	4	11	12	13	11	10	10	12	10	9	9	12	11
SFXN1_HUMAN	6	3	5	7	7	16	12	16	18	22	17	13	12	17	20	21
SNX27_HUMAN	1	0	0	1	1	1	2	4	3	2	1	2	2	3	3	3
SODM_HUMAN	2	1	0	2	6	5	6	4	2	2	5	4	6	3	2	2
AMPH_HUMAN	1	2	2	2	7	13	8	5	4	4	7	9	4	9	4	3
FPPS_HUMAN	5	4	5	4	11	8	16	12	16	14	10	10	14	15	14	11
DC1L2_HUMAN	1	1	2	1	8	3	8	6	1	2	7	6	7	6	7	1
RBM14_HUMAN	4	3	3	3	9	13	11	13	5	10	12	10	12	17	13	13
RB39A_HUMAN	1	0	0	3	6	6	6	4	6	7	6	4	5	5	8	6
RB39B_HUMAN	1	0	0	3	6	6	6	4	6	7	6	4	5	5	8	6
ERH_HUMAN	0	0	0	0	0	0	3	1	2	2	1	1	1	0	3	3
EFNB3_HUMAN	0	0	0	0	1	3	0	5	0	0	2	1	4	1	0	0
KIF3A_HUMAN	0	0	0	0	1	1	2	0	5	3	1	2	1	0	0	1
GBRA3_HUMAN	0	0	0	0	2	3	3	1	0	1	1	3	0	1	1	1
SIR2_HUMAN	0	0	0	0	1	2	2	0	0	1	2	2	1	2	2	2
SRPK2_HUMAN	0	0	0	0	1	3	1	2	2	3	1	0	1	0	1	2
UBP24_HUMAN	0	0	0	0	0	1	3	0	2	2	0	2	0	2	2	3
SMAP2_HUMAN	0	0	0	0	2	2	2	1	1	2	1	1	0	1	2	1
UBP10_HUMAN	0	0	0	0	0	1	2	1	2	4	3	1	0	1	0	2
ZFR_HUMAN	0	0	0	0	2	3	2	2	0	0	2	0	1	0	4	1
AT1A2_HUMAN	19	10	8	18	34	53	32	47	22	31	50	44	45	35	30	28
H2AY_HUMAN	17	13	14	20	42	37	47	35	51	46	47	50	38	52	55	49
CAPS1_HUMAN	0	0	0	0	2	4	2	2	1	1	3	2	1	2	1	1
ADPPT_HUMAN	2	1	0	3	1	5	6	4	8	6	4	3	2	5	5	7
OCAD2_HUMAN	1	0	0	0	1	0	2	0	4	5	1	4	0	0	0	4
SNX1_HUMAN	0	0	0	0	1	1	3	0	3	3	1	1	2	2	2	1
DYHC1_HUMAN	137	130	105	132	351	328	377	298	287	359	292	384	306	346	374	309
RB33B_HUMAN	1	0	0	3	6	6	6	4	6	7	6	4	5	5	7	6
HP1B3_HUMAN	11	7	10	18	29	29	34	30	31	36	29	38	20	31	30	34
TBB1_HUMAN	74	66	73	70	184	176	187	158	167	174	160	202	176	174	169	161
CCAR1_HUMAN	2	1	1	0	3	3	3	2	4	4	1	2	2	5	5	5
ARHG7_HUMAN	2	1	0	1	1	3	7	2	5	4	3	3	3	0	4	5
PROF2_HUMAN	6	6	5	7	17	17	17	17	15	15	18	14	22	17	19	20
STXB3_HUMAN	2	0	0	1	4	4	4	3	4	4	4	3	4	4	3	3
GLO2_HUMAN	1	1	1	1	3	5	3	2	4	5	4	4	5	2	3	4
TBB4A_HUMAN	301	269	265	265	718	672	746	619	673	683	623	772	654	671	668	638
PPP5_HUMAN	3	3	1	6	7	8	10	11	15	14	9	5	5	9	15	10
NIPS1_HUMAN	8	4	3	7	13	14	16	13	19	22	19	14	13	12	20	17
ADK_HUMAN	2	0	2	1	3	4	4	5	6	6	6	2	6	6	5	2
AT1B1_HUMAN	7	1	1	6	12	13	12	12	10	8	12	16	11	10	12	7
H2A2A_HUMAN	35	27	38	41	76	62	86	71	107	96	77	74	71	87	116	111
HNRL1_HUMAN	7	7	3	8	14	13	21	12	15	18	13	18	14	20	16	21
RL19_HUMAN	0	0	1	0	2	2	3	2	4	3	2	2	1	5	5	5
TPPP_HUMAN	0	0	0	0	3	0	3	0	1	2	1	3	0	1	1	1
SCD5_HUMAN	0	0	0	0	2	2	1	1	0	0	1	3	2	2	1	1
PRUN1_HUMAN	0	0	0	0	1	3	2	1	0	0	2	3	0	1	1	2
PREX1_HUMAN	0	0	0	0	0	2	0	1	1	2	3	0	3	0	2	2
LNP_HUMAN	1	0	0	0	3	3	2	1	2	2	2	2	1	2	2	2
SYPH_HUMAN	0	0	0	0	2	3	2	1	0	2	0	2	1	1	1	1
PALM_HUMAN	0	0	0	0	2	2	2	1	0	1	1	1	1	1	3	1
NEUA_HUMAN	2	1	0	1	5	5	5	4	4	4	4	6	3	5	4	4
KIF1C_HUMAN	0	0	0	0	1	2	1	2	1	1	2	1	1	1	2	0
RASK_HUMAN	1	0	0	0	1	1	5	2	4	2	3	3	2	3	4	3
CUL2_HUMAN	0	0	0	1	3	1	1	2	4	6	7	1	1	1	2	2
SMCA2_HUMAN	1	0	1	2	4	3	6	3	6	8	3	2	2	2	6	3
CSK21_HUMAN	3	2	4	3	6	8	10	9	10	10	7	8	8	10	13	12
VATE1_HUMAN	2	1	0	0	4	6	3	4	3	4	5	3	4	3	4	5
COMT_HUMAN	0	0	0	0	0	0	0	0	3	3	3	3	1	0	0	0
SMYD3_HUMAN	0	0	0	0	1	0	1	1	3	1	3	0	1	1	2	2
ODPX_HUMAN	0	0	0	0	0	1	1	0	2	3	0	2	2	0	2	2
NIT1_HUMAN	2	0	1	0	3	2	3	3	3	3	4	3	4	5	3	4
SLTM_HUMAN	0	0	0	0	1	3	1	0	0	3	1	2	2	2	1	0
PDIP3_HUMAN	0	0	0	0	1	4	1	3	2	0	2	0	2	3	3	0
UBA3_HUMAN	2	2	1	2	5	6	5	6	8	8	5	6	5	7	7	6
OXSR1_HUMAN	2	1	1	1	5	3	5	5	5	5	4	1	6	4	4	7
PTPRS_HUMAN	0	1	1	1	5	2	5	1	5	4	3	3	1	0	1	3
RAC1_HUMAN	10	3	7	11	20	21	20	20	19	20	22	17	19	17	26	24
NFL_HUMAN	13	11	18	16	70	47	69	36	3	9	38	71	30	67	22	5
LAP2A_HUMAN	10	6	4	6	15	15	15	15	11	15	13	13	15	17	19	16
PSPC1_HUMAN	7	4	3	5	11	13	14	14	13	14	13	15	10	16	16	12
RAB8B_HUMAN	7	3	3	7	16	14	17	10	19	17	13	11	11	15	16	17
AN32E_HUMAN	2	2	2	2	6	4	6	5	8	8	7	5	5	7	5	8
HXK2_HUMAN	6	2	2	6	15	14	15	13	9	9	10	11	9	20	16	13
HNRLL_HUMAN	1	1	2	1	4	7	6	4	6	6	6	5	5	9	5	6
DEK_HUMAN	2	0	2	3	1	4	6	5	6	7	3	6	5	8	7	7
CELF1_HUMAN	1	3	1	2	3	3	7	3	4	6	4	1	6	6	5	4
YES_HUMAN	3	3	3	5	9	9	11	9	8	8	10	10	8	11	11	6
RTN4_HUMAN	13	10	17	12	32	32	32	26	14	25	25	30	32	32	33	26
SRSF5_HUMAN	0	0	1	2	4	3	4	2	4	4	3	4	3	5	4	4
NSF_HUMAN	7	7	5	11	21	31	22	20	20	26	21	19	14	22	20	19
SYCC_HUMAN	3	2	1	3	7	8	7	4	10	11	5	6	8	5	8	6
LETM1_HUMAN	4	1	1	4	5	10	8	9	6	10	10	7	6	7	5	7
RHEB_HUMAN	0	0	0	0	2	2	2	1	2	2	2	2	1	2	3	3
MRCKB_HUMAN	0	0	0	0	4	1	4	4	1	2	2	2	0	2	2	1
RBM15_HUMAN	1	0	1	0	1	2	4	2	4	3	1	1	2	0	2	3
CORO7_HUMAN	3	2	3	4	8	5	11	7	10	11	6	7	4	6	6	11
AGO1_HUMAN	2	2	1	1	1	5	2	6	4	6	5	4	5	6	6	4
AGO2_HUMAN	2	2	1	1	1	5	3	5	4	6	5	4	4	6	6	4
GBB1_HUMAN	14	10	9	14	31	28	33	27	30	30	25	25	26	30	33	34
PPP6_HUMAN	0	0	0	0	2	2	0	1	3	4	1	0	1	1	3	2
NUD4B_HUMAN	0	0	0	0	0	1	1	0	3	4	2	1	1	1	1	4
MSI1H_HUMAN	1	0	0	0	1	0	0	1	4	1	1	1	1	3	4	3
MEAK7_HUMAN	0	0	0	0	2	2	3	1	2	4	1	1	1	1	1	1
FAS_HUMAN	50	60	47	58	121	99	137	119	123	120	94	132	111	154	127	128
NSF1C_HUMAN	5	5	4	6	14	13	12	11	9	7	11	11	10	9	14	10
TBB8_HUMAN	202	178	174	168	444	408	463	373	421	421	384	483	405	420	420	387
TRIM3_HUMAN	0	0	0	0	3	2	1	0	1	2	0	4	0	1	1	0
OCRL_HUMAN	0	0	0	0	3	2	4	0	2	0	1	2	0	0	1	0
KGUA_HUMAN	0	0	0	0	1	2	0	1	1	1	1	1	1	1	3	1
NEB2_HUMAN	0	0	0	0	1	3	2	1	0	2	1	1	1	1	1	1
RHG21_HUMAN	0	0	0	0	2	1	3	0	0	2	0	3	0	0	3	1
XPO5_HUMAN	0	0	0	0	0	0	2	0	1	1	0	1	0	2	5	3
TRI36_HUMAN	0	0	0	0	1	3	1	1	0	0	2	4	1	2	0	0
LC7L2_HUMAN	4	1	0	1	4	5	6	5	7	7	4	3	4	7	6	7
UB2V2_HUMAN	2	0	1	1	3	3	1	3	3	5	5	2	1	3	4	4
DEST_HUMAN	6	4	7	10	16	18	19	13	21	17	17	15	16	14	14	15
H2A1D_HUMAN	34	28	36	39	67	59	79	68	93	88	71	65	70	82	104	106
PANK4_HUMAN	2	2	0	2	2	4	5	4	8	9	5	2	1	4	5	5
CUL3_HUMAN	8	5	2	7	15	14	13	16	19	14	14	10	6	15	14	14
DNJA1_HUMAN	7	5	4	3	8	12	13	11	11	13	8	10	14	16	13	11
RAB10_HUMAN	8	3	4	7	16	17	18	14	16	19	17	12	15	16	19	19
SAE2_HUMAN	5	5	3	7	15	14	14	12	18	19	12	11	14	22	13	16
TCRG1_HUMAN	3	1	1	2	5	5	6	4	8	7	6	4	1	3	6	8
SRGP1_HUMAN	0	0	0	1	3	2	2	2	0	2	1	2	2	1	2	4
CHTOP_HUMAN	0	0	0	1	1	1	1	2	3	4	3	1	1	1	3	3
GRB2_HUMAN	2	1	2	1	4	3	2	5	7	10	5	4	3	4	3	9
NEDD8_HUMAN	1	0	0	0	0	3	2	1	3	2	1	2	2	1	3	3
ANFY1_HUMAN	2	2	1	2	5	9	6	11	6	4	7	4	7	3	7	6
API5_HUMAN	4	4	3	2	7	7	11	8	11	14	6	3	7	8	15	17
ATP4A_HUMAN	4	2	2	3	9	11	10	9	4	10	9	14	7	8	6	7
TR150_HUMAN	2	1	1	1	4	3	6	5	6	6	3	3	3	5	6	6
TIPRL_HUMAN	2	0	1	0	2	1	3	1	8	7	2	0	3	0	3	5
DCC_HUMAN	2	2	2	2	2	6	2	4	9	7	4	3	4	7	12	7
RALA_HUMAN	3	1	3	3	7	7	7	8	10	8	7	9	8	8	8	11
TPPC3_HUMAN	0	0	0	0	2	2	2	2	3	2	2	0	0	1	2	1
PDE12_HUMAN	0	0	0	0	1	1	4	1	2	2	1	2	0	1	2	1
BTBDH_HUMAN	0	0	0	3	1	3	6	2	7	0	2	4	0	4	2	2
2A5G_HUMAN	0	0	0	0	2	2	1	2	1	3	3	5	1	4	4	3
NLTP_HUMAN	1	0	0	1	1	2	1	4	2	2	4	1	3	2	5	4
SH3G1_HUMAN	3	1	1	4	8	8	7	8	8	11	9	3	6	7	5	8
PRKRA_HUMAN	1	1	1	2	3	4	4	5	2	3	5	6	5	4	2	2
AGO3_HUMAN	1	1	1	1	1	4	2	4	3	6	4	3	3	5	4	3
SORCN_HUMAN	4	1	1	0	3	2	2	5	8	5	6	2	6	0	7	7
EP15R_HUMAN	1	2	1	2	3	6	4	4	4	6	4	7	4	5	5	5
CTBP2_HUMAN	3	1	2	2	3	4	5	5	11	8	4	5	4	6	7	9
KCRB_HUMAN	54	53	66	68	86	111	122	103	195	165	112	96	143	132	142	182
CYFP1_HUMAN	9	5	5	8	17	17	17	18	22	21	19	14	17	18	13	21
HMGB1_HUMAN	20	13	18	23	39	39	42	36	59	53	42	35	41	35	52	61
KC1D_HUMAN	0	0	0	0	3	1	1	1	1	2	0	1	0	1	1	1
2A5D_HUMAN	3	1	1	2	4	6	5	6	4	6	6	6	4	6	6	4
NFIB_HUMAN	0	1	0	1	0	1	0	3	3	5	4	0	3	0	0	8
PPR21_HUMAN	0	0	0	0	0	1	0	0	2	2	1	2	2	2	1	0
PLCD1_HUMAN	0	0	0	0	1	1	1	3	0	1	1	0	2	2	0	0
SF3A2_HUMAN	0	0	0	0	1	0	1	0	5	0	1	0	1	2	1	2
DOCK7_HUMAN	1	0	0	0	3	2	2	2	4	2	2	3	1	1	2	4
CLIP1_HUMAN	0	0	0	0	1	1	1	1	1	2	1	1	1	2	1	1
WDR37_HUMAN	1	1	0	0	2	5	2	2	1	2	3	2	2	2	1	3
PLXB2_HUMAN	0	0	0	0	1	3	1	6	2	2	1	1	7	1	0	2
RFC4_HUMAN	0	0	0	0	1	0	1	0	1	3	1	1	1	2	3	0
IF4G2_HUMAN	7	3	7	6	14	16	16	11	12	12	12	12	10	19	18	15
GNL1_HUMAN	2	3	1	2	4	5	7	6	7	7	7	6	6	7	5	7
H2AV_HUMAN	29	17	21	29	51	44	58	45	65	63	55	46	48	58	72	68
AP1M1_HUMAN	2	1	0	1	2	4	3	2	4	2	2	2	3	2	5	4
PSB1_HUMAN	5	2	4	5	8	12	8	10	13	11	9	10	9	7	15	10
DUT_HUMAN	0	0	0	1	0	2	1	2	2	0	2	2	3	1	1	4
EMC1_HUMAN	0	0	0	0	1	2	4	1	2	2	2	0	2	3	3	1
IMA5_HUMAN	1	0	1	0	0	1	1	1	3	2	1	4	1	3	3	2
ACTZ_HUMAN	12	12	12	11	25	23	28	23	27	23	23	26	22	24	29	28
COTL1_HUMAN	3	1	0	3	6	6	5	4	5	5	6	5	6	6	6	7
MTA1_HUMAN	0	1	0	1	1	2	3	4	2	4	3	1	2	3	2	3
ABR_HUMAN	2	0	1	2	5	5	6	4	4	3	5	7	3	3	3	4
FN3K_HUMAN	1	1	0	0	2	4	1	2	4	5	5	2	2	1	1	2
DSRAD_HUMAN	3	3	1	1	8	7	9	3	6	8	8	3	5	8	10	8
LMNB1_HUMAN	52	34	40	41	81	98	99	93	103	95	87	81	92	91	98	97
PPIL1_HUMAN	2	0	0	2	3	4	4	3	2	2	3	5	3	2	4	4
DPOD1_HUMAN	1	1	1	1	2	1	4	3	5	4	2	2	4	4	3	4
PRS8_HUMAN	13	8	8	10	19	24	21	19	22	18	27	20	20	24	25	25
RAB5C_HUMAN	5	4	3	6	9	12	11	8	14	9	10	9	13	8	11	11
RB12B_HUMAN	0	0	0	0	2	2	1	1	2	2	0	1	0	2	3	2
SNAG_HUMAN	0	0	0	0	2	1	2	1	1	1	1	2	2	2	2	1
D39U1_HUMAN	0	0	0	0	0	1	2	2	3	1	3	0	2	1	1	1
PPCE_HUMAN	5	3	3	5	13	9	15	6	9	9	8	15	6	9	5	8
RPB1_HUMAN	1	0	0	1	0	2	2	2	2	4	2	2	0	3	3	5
KINH_HUMAN	18	18	24	22	39	44	48	41	61	50	41	49	35	54	57	50
RAB4A_HUMAN	1	0	0	1	3	3	3	2	4	4	3	1	2	3	3	3
RAB12_HUMAN	0	0	0	1	3	4	3	2	3	4	3	1	2	3	3	3
UBE2N_HUMAN	9	2	7	9	13	16	11	12	16	16	17	13	12	13	20	18
HMGB3_HUMAN	1	1	1	1	2	3	5	1	6	5	4	3	2	2	5	4
SAE1_HUMAN	4	5	6	8	12	10	11	12	11	15	13	12	12	17	14	17
RAB35_HUMAN	4	2	3	4	10	8	10	6	10	10	8	7	5	10	10	10
GNA12_HUMAN	2	1	2	2	4	5	5	3	6	6	5	5	6	4	5	5
AP2A2_HUMAN	12	7	7	8	23	27	28	18	20	32	24	19	15	20	21	27
LSM4_HUMAN	0	0	0	1	2	3	1	0	2	2	2	1	0	3	2	3
KCC2B_HUMAN	6	4	4	7	11	15	14	14	11	14	12	13	14	12	7	11
UBP47_HUMAN	0	1	1	0	1	2	2	1	2	2	1	2	1	3	1	2
RABE1_HUMAN	1	0	0	0	4	2	4	0	1	1	0	2	1	2	3	2
OX2G_HUMAN	0	0	0	0	2	0	2	0	0	4	1	1	0	1	1	1
SYN2_HUMAN	0	0	0	0	1	2	2	1	1	3	1	1	0	0	0	1
GPSM1_HUMAN	0	0	0	0	0	0	3	0	2	3	1	3	0	0	0	1
STX12_HUMAN	0	0	0	0	1	2	1	1	0	1	2	1	0	1	2	1
PDXL2_HUMAN	0	0	0	0	1	1	2	1	2	0	0	2	1	1	1	1
CPNE4_HUMAN	1	2	0	1	5	1	3	0	2	2	1	9	2	1	1	2
NUP35_HUMAN	0	0	0	0	1	2	0	1	1	2	1	0	0	2	3	0
PFD3_HUMAN	0	0	1	1	2	1	1	2	3	2	2	3	3	2	4	4
STAU1_HUMAN	0	0	0	0	1	1	1	1	0	1	2	1	1	2	1	1
HDGR2_HUMAN	0	0	1	0	0	2	3	2	4	4	3	1	3	1	2	5
AFG2H_HUMAN	0	0	0	0	1	2	1	0	1	2	0	1	1	1	1	2
SNX4_HUMAN	0	0	0	0	1	1	1	1	1	1	1	1	1	1	1	1
UBC9_HUMAN	0	0	0	1	1	1	0	1	2	2	3	2	2	1	3	4
CHMP7_HUMAN	0	0	0	0	0	2	1	1	2	1	0	2	1	0	1	2
MP2K6_HUMAN	0	0	0	0	1	1	1	0	2	1	0	0	1	2	1	3
BRSK2_HUMAN	0	0	0	0	2	2	3	1	1	2	0	2	0	0	0	0
DNJA4_HUMAN	0	0	0	0	1	1	0	0	2	1	0	1	2	1	1	1
DVL3_HUMAN	0	0	0	0	1	1	1	2	0	1	2	0	2	1	1	1
HNRL2_HUMAN	12	12	7	15	28	25	25	26	32	33	25	27	19	28	26	31
1433T_HUMAN	41	26	32	31	67	79	64	74	69	73	76	63	74	73	90	77
PGAM1_HUMAN	30	19	19	24	43	54	50	44	40	41	45	33	47	49	62	58
AT12A_HUMAN	6	2	1	4	11	10	9	10	4	8	10	13	7	8	9	9
HNRPR_HUMAN	33	19	26	26	49	51	56	50	68	64	55	55	50	53	60	52
KAD5_HUMAN	1	1	1	1	3	3	3	2	3	3	3	3	3	2	2	3
RAB14_HUMAN	7	2	4	11	15	19	15	14	14	19	18	12	18	12	22	19
GLYR1_HUMAN	1	0	0	0	2	4	2	2	3	1	2	1	0	2	3	4
GDS1_HUMAN	3	0	4	7	13	10	11	10	9	9	11	11	9	11	9	8
DNJC5_HUMAN	1	0	0	0	1	2	2	2	0	2	2	2	0	1	0	2
JIP3_HUMAN	0	0	0	1	2	2	2	1	0	2	0	2	0	2	1	3
POGZ_HUMAN	0	0	0	0	1	1	2	1	1	3	1	1	1	2	1	1
AIP_HUMAN	0	0	0	0	0	2	1	1	3	1	0	1	1	1	3	2
M4K4_HUMAN	3	2	3	2	7	3	12	4	5	10	5	5	5	4	7	7
P66B_HUMAN	0	1	0	0	0	1	1	1	2	2	1	0	2	1	1	4
SCRN1_HUMAN	13	12	10	16	23	32	22	31	36	31	28	28	39	25	28	38
SRSF7_HUMAN	5	4	4	4	10	12	11	9	12	12	11	12	9	13	14	13
VA0D1_HUMAN	1	1	1	1	4	5	3	3	4	5	5	2	1	0	2	3
SNX12_HUMAN	2	1	1	2	5	4	5	4	6	5	4	4	5	4	5	6
KDM1A_HUMAN	2	1	2	2	3	4	4	4	5	7	3	2	3	7	6	9
SRSF1_HUMAN	10	7	8	10	11	8	21	11	21	21	14	19	11	16	24	22
ARL8A_HUMAN	1	1	0	2	5	6	3	5	3	3	6	3	4	4	5	4
CUTA_HUMAN	0	0	1	1	1	3	2	2	2	2	3	2	2	2	3	4
ACTY_HUMAN	7	5	6	6	12	8	14	11	15	12	11	13	13	16	15	15
THYN1_HUMAN	2	1	1	1	2	3	5	3	4	4	3	3	2	3	2	6
MUTA_HUMAN	2	1	1	2	2	2	0	2	7	5	2	4	4	1	3	4
TBCD_HUMAN	6	4	3	2	8	11	6	7	8	12	7	7	4	8	9	7
KAPCA_HUMAN	6	6	4	7	21	13	19	10	8	12	12	21	6	13	13	11
SMC1A_HUMAN	4	4	3	9	9	9	17	15	22	17	15	10	8	19	12	17
ETHE1_HUMAN	0	0	0	0	1	2	1	1	3	3	1	1	1	0	2	3
MEP50_HUMAN	0	0	2	0	0	2	1	2	2	3	2	1	0	2	2	3
CUL4B_HUMAN	4	3	0	1	6	8	5	6	5	6	3	2	2	2	3	3
XRN2_HUMAN	0	0	1	0	0	0	1	0	4	2	2	2	2	3	3	2
CPSF7_HUMAN	2	0	0	1	3	2	2	2	4	3	3	3	2	2	3	4
NT5D2_HUMAN	1	1	1	1	3	4	2	4	4	3	3	2	1	4	2	1
LASP1_HUMAN	7	1	3	7	12	14	14	11	5	11	12	10	10	10	10	12
TXTP_HUMAN	6	2	1	6	7	10	7	12	10	10	7	7	10	8	14	12
SAFB1_HUMAN	3	4	4	6	10	11	11	9	8	14	9	8	10	8	7	8
TKT_HUMAN	50	47	30	48	73	85	77	83	103	104	89	80	89	90	91	93
DDAH2_HUMAN	12	11	12	13	25	26	21	23	34	26	28	18	32	20	34	32
IPYR2_HUMAN	3	1	0	1	3	3	3	4	5	3	3	3	3	6	6	5
XPR1_HUMAN	0	0	0	0	0	0	0	1	4	2	0	1	0	0	0	4
TM163_HUMAN	0	0	0	0	0	3	0	0	0	0	2	1	1	1	2	2
CAN5_HUMAN	0	0	0	0	1	1	2	0	1	2	1	0	1	1	1	1
MICA3_HUMAN	0	0	0	0	2	1	3	1	0	2	1	0	0	2	0	0
DBNL_HUMAN	5	2	2	3	9	4	9	3	6	5	7	8	9	8	8	6
ACBP_HUMAN	0	0	0	0	0	1	0	2	0	0	3	0	4	0	0	2
SYF1_HUMAN	0	0	0	0	0	1	1	1	2	1	0	1	0	2	1	1
GRAP1_HUMAN	0	0	0	0	0	1	2	1	0	2	2	0	1	0	1	2
GAPD1_HUMAN	0	0	0	0	0	1	1	2	1	1	1	1	2	0	1	1
SMD1_HUMAN	4	2	2	2	5	4	5	6	9	6	4	5	5	8	9	6
SFXN3_HUMAN	3	2	1	3	4	2	4	2	7	12	4	6	1	2	6	9
SCYL2_HUMAN	0	0	0	0	1	1	1	1	1	1	1	1	1	1	1	1
F169A_HUMAN	0	0	0	0	1	2	2	2	0	1	1	1	0	1	0	0
VATD_HUMAN	0	0	0	0	0	1	1	0	2	1	1	2	1	0	2	1
VPS45_HUMAN	0	1	1	2	4	5	1	4	3	3	3	3	2	3	4	2
H2A1B_HUMAN	34	27	33	36	57	50	67	57	77	75	57	57	58	73	90	92
RCN2_HUMAN	2	1	1	1	6	7	4	5	3	0	3	5	4	8	3	2
KPRA_HUMAN	1	1	2	2	4	4	3	4	7	8	4	3	1	3	4	4
LBR_HUMAN	2	1	0	2	3	2	6	1	2	4	0	4	1	6	5	3
MK03_HUMAN	6	4	2	6	7	10	9	10	15	15	11	13	11	7	12	11
RS21_HUMAN	1	1	0	0	2	2	2	3	2	3	2	1	3	2	1	4
UBE2K_HUMAN	3	0	1	3	4	5	4	3	6	5	6	4	3	2	6	6
1433E_HUMAN	52	40	49	52	87	105	77	95	114	99	103	76	113	99	110	114
SSDH_HUMAN	6	3	2	5	4	14	9	12	7	5	15	8	10	11	6	7
MGST3_HUMAN	0	0	0	0	1	1	0	1	0	2	1	0	2	2	2	4
AKAP9_HUMAN	0	0	0	0	3	3	0	2	0	2	0	3	0	1	0	1
XRCC1_HUMAN	1	0	0	0	1	1	1	1	2	2	1	1	1	2	1	1
RNPS1_HUMAN	0	0	0	0	0	0	4	1	2	3	1	0	0	3	1	1
UB2D1_HUMAN	0	0	0	0	1	1	1	1	2	1	1	1	1	1	2	2
EXOS9_HUMAN	0	0	0	1	1	1	1	1	2	1	2	1	1	2	1	2
RCC1_HUMAN	4	2	1	0	5	3	6	4	8	7	2	2	3	6	4	7
DHCR7_HUMAN	2	1	2	1	6	5	6	3	7	5	2	5	4	4	6	7
ARL8B_HUMAN	1	0	0	1	3	4	2	3	1	2	4	2	3	2	4	3
PKN1_HUMAN	3	0	0	0	2	3	3	3	1	3	3	4	1	2	3	3
ANK3_HUMAN	1	1	1	1	4	3	7	2	1	4	1	4	1	3	1	1
RBBP4_HUMAN	5	3	7	6	5	11	11	10	17	12	10	8	13	9	13	15
DYL1_HUMAN	2	1	0	3	4	3	5	5	6	5	4	2	8	4	7	8
KHDR1_HUMAN	9	6	8	11	15	19	21	17	20	18	21	19	19	19	19	21
CN37_HUMAN	3	1	1	4	9	9	8	10	6	8	13	7	8	5	6	8
HSP74_HUMAN	30	24	27	33	52	51	63	53	60	63	45	60	45	56	59	67
VAPB_HUMAN	1	1	1	2	3	3	4	3	0	2	5	2	3	3	5	2
PSB4_HUMAN	4	3	5	2	8	6	7	5	13	7	9	5	11	6	11	11
TNIK_HUMAN	3	2	3	2	10	3	12	4	4	8	4	6	3	5	6	5
GBB2_HUMAN	9	9	7	11	23	19	22	15	21	20	15	19	17	19	19	20
SYSC_HUMAN	10	6	9	10	19	19	20	15	30	25	17	21	15	18	18	24
PFD2_HUMAN	2	1	1	1	2	3	3	1	5	5	4	3	1	2	4	5
H2AX_HUMAN	30	25	30	33	51	45	57	53	67	64	52	46	55	59	77	81
LRC47_HUMAN	8	9	8	10	19	21	13	16	22	23	20	15	18	15	21	21
GMPR2_HUMAN	1	0	0	1	0	3	0	1	4	3	2	2	2	2	1	3
LANC1_HUMAN	5	1	1	6	6	8	8	7	14	10	6	6	4	7	9	12
DDX46_HUMAN	1	0	0	1	1	0	2	3	4	5	2	2	0	2	1	4
RASN_HUMAN	1	0	0	0	2	1	4	1	3	2	1	3	1	2	2	3
RBBP7_HUMAN	3	3	3	3	2	5	7	7	12	8	6	4	9	7	8	9
1433B_HUMAN	28	20	27	27	52	57	41	47	56	55	58	46	50	45	69	65
EPHA2_HUMAN	0	0	0	0	2	1	2	1	1	0	0	2	1	1	0	0
WASF3_HUMAN	0	0	0	0	0	1	0	1	1	2	1	0	0	1	1	3
PLPR3_HUMAN	0	0	0	0	2	1	3	0	0	2	0	3	0	0	0	0
CFA20_HUMAN	0	0	0	0	0	1	1	1	1	1	1	0	2	1	1	1
AT8A2_HUMAN	0	0	0	0	1	0	1	1	0	1	2	1	0	1	2	1
PI51C_HUMAN	0	0	0	0	1	1	1	1	1	1	0	1	1	0	2	1
FMNL2_HUMAN	0	0	0	0	1	0	0	1	2	3	0	0	1	0	1	2
SMC2_HUMAN	0	0	0	0	0	0	1	1	3	2	0	0	0	1	2	1
PUM2_HUMAN	0	0	0	0	0	0	1	2	2	1	1	0	1	1	1	1
WNK3_HUMAN	0	0	0	0	1	2	1	0	1	1	2	0	0	1	2	0
VAV2_HUMAN	0	0	0	0	0	2	1	0	2	1	2	1	0	1	0	1
EPHB1_HUMAN	0	0	0	0	2	2	2	0	2	0	0	3	0	0	0	0
IMA3_HUMAN	3	1	1	2	3	4	2	8	5	7	3	4	6	4	4	7
AR6P1_HUMAN	0	0	0	0	1	1	0	1	1	0	1	0	1	2	2	1
CND3_HUMAN	0	0	0	0	0	0	1	1	2	2	0	0	0	2	1	2
CERS6_HUMAN	0	0	0	0	0	0	2	1	1	1	0	1	1	1	2	1
SRS12_HUMAN	0	0	0	0	1	0	2	0	1	0	1	0	1	2	2	1
MFN2_HUMAN	0	0	0	0	2	2	1	1	1	0	1	1	1	0	0	1
H14_HUMAN	23	13	17	23	31	30	39	40	40	41	39	36	34	48	43	38
SRP14_HUMAN	6	5	4	3	8	8	13	9	11	9	12	12	9	10	14	10
MIF_HUMAN	6	5	5	6	9	11	10	10	12	10	10	12	9	9	14	18
DC1I2_HUMAN	9	7	7	7	14	19	16	15	15	17	15	16	16	12	17	13
H2A1A_HUMAN	28	23	29	32	48	43	54	48	64	60	50	45	51	55	73	77
H12_HUMAN	23	13	17	23	31	30	39	39	42	40	38	36	36	48	42	37
CDK2_HUMAN	2	1	1	1	2	2	5	2	4	3	4	2	2	4	5	3
CHD4_HUMAN	7	2	4	4	12	4	17	5	9	16	8	7	6	12	8	9
SYFA_HUMAN	1	1	1	4	6	6	5	4	7	7	6	5	4	5	5	4
MK01_HUMAN	8	6	7	12	12	16	15	15	25	23	20	14	21	13	16	23
NQO2_HUMAN	1	0	0	0	0	2	2	1	0	0	2	0	1	2	3	2
NDRG1_HUMAN	0	0	0	0	1	0	1	0	4	2	0	1	0	0	0	2
ENAH_HUMAN	1	2	3	4	4	6	8	7	6	5	5	3	6	4	9	7
FKBP3_HUMAN	6	2	3	2	2	6	6	4	6	6	7	5	7	7	6	7
PRP6_HUMAN	2	1	1	2	3	4	5	3	6	5	5	1	3	4	3	5
PP6R3_HUMAN	1	0	0	0	1	3	1	1	3	2	0	0	1	1	3	2
IF4B_HUMAN	2	2	4	3	7	10	7	5	4	5	7	5	5	6	8	8
1433Z_HUMAN	53	34	46	54	96	93	91	72	105	90	94	99	87	101	110	100
LCK_HUMAN	2	1	2	2	4	4	6	4	5	4	5	4	4	6	4	3
CP51A_HUMAN	1	0	0	1	3	2	2	3	2	1	1	3	1	1	2	2
HPBP1_HUMAN	1	0	0	0	2	0	2	0	3	3	3	1	1	1	3	3
VP26B_HUMAN	0	0	1	1	2	3	2	1	3	3	2	2	1	0	1	3
STRAP_HUMAN	1	2	3	1	2	5	4	2	7	3	6	6	4	6	9	6
IMA4_HUMAN	3	2	1	3	4	4	4	7	6	5	3	4	5	5	6	7
UBP2L_HUMAN	1	1	1	1	3	2	5	1	0	1	2	1	1	2	5	4
CMTR1_HUMAN	2	0	0	0	2	3	2	1	2	3	1	2	3	3	2	2
PIR_HUMAN	1	0	1	1	2	3	2	2	2	1	2	1	3	1	1	3
RFOX1_HUMAN	1	1	1	1	4	2	4	2	2	2	2	2	2	1	3	3
CHAP1_HUMAN	1	0	0	1	1	4	2	3	4	3	2	1	2	2	4	3
RAE1L_HUMAN	1	1	1	1	3	3	3	4	4	2	2	3	0	3	5	2
H13_HUMAN	23	13	17	22	30	30	39	38	39	39	37	36	33	47	41	37
ASML_HUMAN	4	3	3	3	6	7	5	9	7	9	7	12	7	3	7	5
MAP1S_HUMAN	1	1	0	2	7	3	4	0	3	2	1	3	3	3	4	5
ALDOC_HUMAN	18	13	12	16	19	27	28	31	34	28	29	18	33	31	30	35
CDK9_HUMAN	2	1	1	1	2	3	4	3	4	4	4	2	3	4	4	4
PYGB_HUMAN	24	17	9	17	29	46	27	38	41	34	33	29	34	29	36	35
PABP1_HUMAN	16	12	10	10	24	24	23	20	31	27	23	22	31	28	24	31
DDX6_HUMAN	7	8	8	10	14	17	15	13	19	19	14	18	17	19	19	18
TADBP_HUMAN	4	3	2	5	5	8	8	7	9	6	8	6	6	9	12	10
BCR_HUMAN	2	0	1	2	3	4	6	4	3	3	3	6	3	3	3	3
SMU1_HUMAN	1	1	1	1	4	3	2	3	5	5	3	2	4	5	3	4
H11_HUMAN	11	6	9	10	13	15	20	17	20	18	20	19	18	23	20	17
SMC3_HUMAN	6	7	3	8	9	12	9	11	21	16	13	5	13	20	17	22
EDC4_HUMAN	2	1	1	2	5	4	3	4	3	5	5	6	4	5	4	2
FEN1_HUMAN	2	2	1	0	4	3	4	4	5	5	3	1	7	4	3	4
UBR4_HUMAN	2	4	4	5	7	12	7	9	5	11	7	10	8	7	8	15
ULA1_HUMAN	1	0	1	3	1	6	5	5	6	4	5	2	5	4	4	7
ATP5L_HUMAN	1	2	1	3	1	5	2	3	7	9	7	4	5	4	8	5
PPM1G_HUMAN	2	2	1	3	4	3	6	5	8	7	5	5	2	4	7	6
PSD11_HUMAN	1	3	5	6	6	7	6	7	11	8	5	5	5	8	9	4
SP100_HUMAN	3	3	2	3	7	8	7	6	10	9	6	6	7	7	10	10
PSD12_HUMAN	12	6	7	10	13	19	15	15	19	12	16	15	17	17	19	18
PFKAM_HUMAN	18	16	15	21	32	38	31	37	45	43	38	32	32	35	36	37
KAP2_HUMAN	9	10	4	9	22	23	20	15	10	19	18	20	16	14	16	15
TOM70_HUMAN	6	2	4	6	8	11	13	11	14	19	9	9	8	12	8	9
NFM_HUMAN	28	22	26	38	86	76	86	65	7	17	62	89	55	80	27	12
PARP1_HUMAN	28	26	19	33	35	38	51	47	77	63	45	40	46	57	55	66
PICAL_HUMAN	2	1	1	3	5	6	5	6	3	4	6	5	3	4	5	6
OGFR_HUMAN	0	0	0	0	1	1	2	1	1	3	2	1	0	1	2	2
ACAD8_HUMAN	0	0	0	0	0	1	0	1	1	1	3	1	1	0	0	0
TRI33_HUMAN	0	0	0	0	1	0	1	0	1	1	2	1	1	0	1	1
SMHD1_HUMAN	1	2	2	2	2	3	5	4	7	8	3	1	1	4	5	4
UBP11_HUMAN	0	0	0	0	0	2	2	1	1	2	0	0	0	1	1	0
RAB8A_HUMAN	7	3	4	8	14	13	13	10	14	14	12	9	11	12	13	14
CRAC1_HUMAN	0	0	0	0	0	3	0	1	0	0	2	2	2	0	0	0
QORL1_HUMAN	0	0	0	0	1	0	1	1	0	1	1	0	2	0	1	2
LRSM1_HUMAN	0	0	0	0	2	0	1	0	1	1	1	2	1	1	0	0
WDR7_HUMAN	0	0	0	0	1	1	1	0	1	2	1	1	0	0	1	1
NUCKS_HUMAN	0	0	2	1	1	3	3	1	3	2	1	2	1	1	3	2
PP2BC_HUMAN	0	1	1	1	3	1	1	1	4	4	2	2	3	2	2	2
PHIP_HUMAN	0	0	0	0	0	0	1	0	2	3	0	0	0	1	0	3
ACOX1_HUMAN	0	0	0	0	0	2	0	1	1	3	2	0	0	2	2	1
HMGN4_HUMAN	0	0	0	0	1	1	1	2	1	2	0	2	0	0	0	0
6PGL_HUMAN	10	9	6	8	17	18	16	16	16	15	20	14	15	15	17	21
RAB18_HUMAN	2	1	2	2	2	5	3	5	3	4	5	2	3	3	3	6
UBA5_HUMAN	0	0	0	1	1	0	1	0	1	1	2	1	1	1	3	2
NNRE_HUMAN	1	0	1	0	1	1	1	2	3	2	3	2	1	1	1	2
GTR3_HUMAN	0	0	0	0	1	1	2	1	1	2	1	2	1	2	2	2
PPM1A_HUMAN	0	1	1	1	1	3	3	1	2	3	2	1	0	2	2	4
RRP44_HUMAN	0	0	0	0	2	1	1	3	1	2	1	0	1	1	2	1
PA1B2_HUMAN	5	4	4	4	8	9	6	8	10	8	9	6	11	8	10	13
PLRG1_HUMAN	0	0	0	0	2	0	0	0	2	1	0	0	0	0	3	1
SRC8_HUMAN	2	0	0	0	3	3	2	3	0	0	2	1	3	1	1	2
RANG_HUMAN	3	2	3	3	4	4	5	3	7	5	3	5	4	7	6	7
SNW1_HUMAN	0	0	0	2	1	2	2	1	1	1	2	2	2	2	1	1
TOM22_HUMAN	0	0	0	1	1	1	0	0	0	1	1	2	0	1	2	3
NDUA6_HUMAN	0	0	1	0	0	1	1	0	2	1	1	1	1	1	2	2
OSB10_HUMAN	0	0	0	0	1	2	1	1	1	0	0	1	1	1	0	0
HTSF1_HUMAN	0	0	0	0	0	0	0	0	2	1	0	2	0	3	0	0
RENR_HUMAN	0	0	0	0	0	1	1	1	0	2	0	1	0	0	3	1
HACD3_HUMAN	6	3	2	4	9	11	10	8	3	8	8	13	9	8	9	7
SNUT2_HUMAN	0	0	0	1	1	1	2	1	4	1	2	1	1	1	2	1
AKT3_HUMAN	0	0	1	1	2	2	2	2	2	5	0	0	1	1	1	2
CLCB_HUMAN	0	1	0	1	2	0	1	1	2	3	1	1	2	3	2	3
GSHR_HUMAN	8	4	2	5	7	10	9	10	13	9	8	10	8	13	10	11
TMM11_HUMAN	0	0	0	0	1	0	1	1	2	0	1	0	0	1	2	1
PIN1_HUMAN	0	0	0	2	2	1	2	1	2	2	3	2	0	1	3	2
KCRU_HUMAN	3	0	0	0	1	3	2	2	2	4	2	4	1	3	1	3
PSMD1_HUMAN	16	9	8	15	20	27	22	23	18	27	25	20	20	24	26	26
MAP1A_HUMAN	7	9	6	13	15	23	16	19	14	16	15	15	19	15	23	13
QCR2_HUMAN	11	6	5	10	12	17	15	12	20	16	15	17	18	17	18	12
MATR3_HUMAN	18	25	23	29	40	47	46	43	45	49	42	47	41	50	53	57
SF3B2_HUMAN	11	4	3	9	10	8	13	15	15	14	11	12	12	16	14	13
ARC1A_HUMAN	3	4	3	3	8	8	7	8	10	9	7	6	11	6	9	8
HS105_HUMAN	15	12	11	18	23	26	23	23	26	27	20	19	17	25	27	26
VAT1_HUMAN	11	10	9	11	35	18	28	23	15	13	20	30	24	22	21	13
AATM_HUMAN	21	11	12	15	25	26	26	25	35	28	24	26	21	31	34	29
RAB1A_HUMAN	13	5	6	12	17	20	17	12	22	18	20	14	20	18	22	19
SYNC_HUMAN	14	8	4	12	13	20	15	18	18	17	20	15	20	25	20	16
HNRPM_HUMAN	39	31	31	47	65	63	75	49	84	68	53	70	67	68	87	73
TBCA_HUMAN	2	2	3	4	5	4	4	3	7	6	7	5	4	2	7	10
PGRC1_HUMAN	9	9	6	12	20	15	20	13	15	15	16	19	14	17	19	18
TCTP_HUMAN	2	1	0	3	4	3	4	3	5	5	4	4	4	2	5	7
BUB3_HUMAN	6	3	4	3	7	9	7	8	8	10	9	7	8	10	10	11
RBM12_HUMAN	2	1	1	2	5	3	5	3	5	4	3	4	2	6	4	4
USP9X_HUMAN	3	2	5	3	4	11	5	5	8	11	7	6	8	8	10	9
MMSA_HUMAN	9	4	2	4	4	10	5	11	11	11	20	7	13	7	6	10
HDAC2_HUMAN	6	3	5	4	8	9	12	9	13	11	7	7	8	10	11	13
RALB_HUMAN	3	1	2	3	5	5	4	5	7	7	5	6	5	6	5	7
RPB2_HUMAN	0	3	3	3	5	6	4	6	4	5	3	4	4	6	7	8
PTPRD_HUMAN	0	1	1	1	3	1	3	1	4	3	1	3	1	0	1	1
EWS_HUMAN	2	3	2	2	6	4	5	5	3	6	4	4	1	4	6	7
AT2B4_HUMAN	13	2	4	11	8	30	11	22	17	18	22	13	25	18	16	24
RL40_HUMAN	30	28	28	34	50	55	64	55	60	54	59	56	46	53	64	57
ROA0_HUMAN	13	5	10	9	15	15	20	13	21	23	15	12	14	19	22	24
ELOC_HUMAN	1	2	2	3	3	5	5	3	5	4	4	3	4	3	6	8
EXOC1_HUMAN	0	0	1	0	1	1	2	1	2	3	1	0	2	2	2	3
TCPE_HUMAN	37	30	34	36	51	58	65	56	75	71	57	62	61	63	62	70
CHM4B_HUMAN	1	0	0	1	2	1	2	0	3	4	1	1	0	1	3	3
EFL1_HUMAN	1	0	0	0	1	1	2	2	2	1	2	1	1	3	1	2
PP2AA_HUMAN	8	4	7	5	9	11	10	8	13	11	13	11	11	10	16	15
ALDH2_HUMAN	17	13	6	10	15	23	16	19	27	21	20	21	22	17	18	15
ASAP1_HUMAN	1	0	0	0	1	1	1	1	3	1	1	1	1	0	1	3
NEK6_HUMAN	1	0	0	1	2	1	1	1	2	2	1	0	1	2	2	1
AASS_HUMAN	1	1	0	0	0	1	0	2	2	1	2	1	3	0	1	1
APLP2_HUMAN	0	0	0	0	0	2	2	1	1	2	1	1	2	2	2	1
TTL12_HUMAN	4	4	0	4	3	4	4	6	11	8	5	3	4	7	5	10
RIC8A_HUMAN	2	3	1	0	6	5	3	3	3	2	4	4	4	2	3	1
NSDHL_HUMAN	2	2	3	3	4	4	4	3	8	7	4	3	6	7	6	7
SGTA_HUMAN	2	5	6	6	8	11	9	7	11	10	10	7	7	8	14	12
RTL8C_HUMAN	0	0	0	1	0	0	1	1	2	2	0	1	2	0	2	2
MAP11_HUMAN	1	0	0	0	1	0	0	1	2	0	2	1	1	2	1	1
RAP2A_HUMAN	1	0	0	0	1	1	1	0	2	1	2	1	1	0	1	2
RAB2A_HUMAN	13	7	4	14	20	21	20	18	21	22	19	21	17	26	26	22
SRRT_HUMAN	6	4	4	4	8	10	13	9	7	12	9	6	9	9	10	8
TIRR_HUMAN	0	0	0	1	0	1	1	1	1	2	0	2	1	1	2	0
HKDC1_HUMAN	5	1	1	6	7	8	7	7	7	6	9	7	5	7	5	7
HNRH3_HUMAN	10	7	8	6	14	14	14	13	18	15	14	14	14	16	16	15
NP1L4_HUMAN	11	4	9	14	21	17	16	19	20	16	19	20	21	20	17	20
CDK3_HUMAN	2	1	1	1	2	2	4	2	3	4	3	2	3	4	3	2
SPS1_HUMAN	2	1	2	4	6	4	3	3	5	3	5	4	4	5	7	3
IGS21_HUMAN	0	0	0	0	1	0	2	0	1	0	0	3	0	0	0	2
PCS1N_HUMAN	0	0	0	0	2	0	1	0	0	0	0	2	0	0	2	2
CAMP2_HUMAN	0	0	0	0	2	2	2	0	0	0	0	1	0	1	0	1
MEX3A_HUMAN	0	0	0	0	1	1	1	0	0	0	1	1	0	1	2	1
PSD10_HUMAN	0	0	1	2	1	5	0	2	2	2	2	1	4	2	3	5
STAM1_HUMAN	0	0	0	0	1	0	3	1	0	0	0	0	1	0	2	1
WBP11_HUMAN	0	0	0	0	0	1	1	0	0	1	1	1	0	1	3	0
EPHA7_HUMAN	0	0	0	0	1	1	2	0	3	1	0	1	0	0	0	0
MMS19_HUMAN	1	1	1	2	1	1	2	1	4	5	2	1	1	3	3	7
CAMP3_HUMAN	0	0	0	0	3	1	3	0	0	1	0	1	0	0	0	0
FGD4_HUMAN	0	0	0	0	1	1	0	0	2	1	0	1	0	1	0	1
RAB2B_HUMAN	8	4	3	7	14	11	14	11	11	14	13	12	10	15	16	13
YTHD2_HUMAN	0	0	0	0	1	1	1	1	0	2	1	0	1	1	0	0
NELFD_HUMAN	0	0	0	0	0	0	1	0	2	2	0	0	0	1	1	2
H4_HUMAN	81	79	91	101	135	109	149	140	191	180	155	136	123	172	203	202
THOC4_HUMAN	5	2	3	4	6	9	6	7	6	8	7	7	7	7	8	7
DYN2_HUMAN	9	4	5	7	13	19	13	16	10	14	15	12	14	12	11	10
TBC13_HUMAN	1	0	0	1	2	3	1	3	2	2	2	1	3	2	2	3
PUF60_HUMAN	3	2	1	2	3	7	6	7	4	6	3	7	5	7	6	4
SF3A1_HUMAN	6	4	4	7	13	10	9	16	6	10	10	8	9	10	8	10
GBB4_HUMAN	6	5	4	6	11	9	10	8	12	10	7	8	10	8	10	11
RS27A_HUMAN	33	29	30	37	51	57	67	56	61	56	61	59	47	57	70	61
OLA1_HUMAN	9	6	7	6	10	13	13	12	11	11	12	13	14	15	12	9
SP16H_HUMAN	7	7	5	9	11	12	12	8	18	13	13	3	11	14	15	20
CALB2_HUMAN	2	2	1	1	2	3	1	3	7	5	3	1	4	3	2	8
NSUN2_HUMAN	1	1	1	0	2	2	2	1	1	3	1	1	1	4	3	2
RO60_HUMAN	10	6	5	9	8	21	10	19	15	13	19	9	19	15	14	19
MLP3B_HUMAN	2	1	1	1	3	4	4	4	1	3	5	3	2	2	5	5
NUP93_HUMAN	3	1	2	1	3	6	6	4	3	9	3	3	4	4	7	5
G3BP2_HUMAN	2	3	2	5	6	9	5	8	5	5	7	4	5	5	7	7
1433S_HUMAN	11	8	11	10	20	21	14	15	19	19	17	16	17	16	20	22
ARPC3_HUMAN	3	2	1	2	5	3	5	3	4	6	4	5	4	5	5	5
SAFB2_HUMAN	1	1	1	2	3	6	3	4	1	4	3	2	1	3	3	3
ACINU_HUMAN	1	1	1	2	2	5	4	3	2	5	4	3	1	3	2	5
RAB15_HUMAN	3	2	2	3	6	6	6	5	6	6	6	3	4	6	6	6
SEC63_HUMAN	1	0	1	1	2	1	1	1	3	3	1	1	1	1	2	0
CAP1_HUMAN	22	16	8	15	29	33	30	31	31	30	30	33	34	25	36	24
U2AF2_HUMAN	6	3	2	6	7	10	9	8	6	6	11	6	4	9	9	13
SRSF3_HUMAN	6	3	4	7	9	8	7	4	9	10	9	8	11	9	11	12
NOP58_HUMAN	5	3	2	9	10	6	11	7	13	15	8	8	5	12	11	14
KPRB_HUMAN	3	1	3	4	3	3	2	3	10	8	4	3	3	4	3	11
NNTM_HUMAN	12	6	8	11	14	17	17	17	19	34	14	29	13	15	18	26
H2B2E_HUMAN	63	49	66	69	91	78	106	83	129	117	97	101	90	107	130	137
H2B1O_HUMAN	63	49	66	69	91	78	106	83	126	117	97	103	90	107	130	137
H2B1J_HUMAN	63	49	66	69	91	78	106	83	128	117	97	101	90	107	130	137
H2B1B_HUMAN	63	49	66	69	91	78	106	83	126	117	97	101	90	107	130	137
FADS2_HUMAN	1	0	0	0	0	1	1	1	1	1	1	2	0	3	3	2
ATD3B_HUMAN	2	1	1	2	1	6	2	1	7	5	2	3	5	3	4	4
T120A_HUMAN	0	0	1	0	2	1	2	1	1	2	1	1	1	1	2	1
DIP2B_HUMAN	1	0	0	0	2	2	1	1	0	1	2	2	1	1	2	1
UBQL4_HUMAN	0	0	0	1	3	1	2	2	0	1	1	1	1	0	2	1
RDH11_HUMAN	1	0	2	1	0	3	3	2	1	1	3	2	4	3	3	4
ARPC2_HUMAN	5	4	6	7	8	9	7	11	10	12	11	9	10	9	13	16
CBX3_HUMAN	3	2	2	6	4	4	6	4	9	6	3	5	5	6	11	8
H2B1M_HUMAN	67	53	69	75	100	82	114	91	135	124	104	109	95	115	138	144
COF1_HUMAN	32	26	29	31	44	57	47	43	58	51	51	46	57	47	63	58
GLOD4_HUMAN	9	7	5	11	14	19	12	11	17	12	12	14	18	12	13	22
SCPDL_HUMAN	5	1	0	3	5	5	8	6	5	5	7	6	5	6	5	5
H2B1C_HUMAN	67	53	69	75	99	82	113	91	137	123	103	108	95	115	138	144
IMPA1_HUMAN	2	1	1	1	2	5	2	4	2	2	4	2	4	4	5	4
PGM2_HUMAN	3	2	1	0	2	4	2	5	4	6	5	1	2	1	3	1
PSMD7_HUMAN	4	5	4	4	6	5	7	6	9	9	7	7	7	11	10	7
H2B1H_HUMAN	67	53	69	75	99	82	113	91	134	123	103	110	95	115	138	144
H2B1K_HUMAN	67	53	69	75	99	82	113	91	136	123	103	108	95	115	138	144
H2B1D_HUMAN	67	53	69	75	99	82	113	91	135	123	103	108	95	115	138	144
H2B1N_HUMAN	67	53	69	75	99	82	113	91	134	123	103	108	95	115	138	144
FUBP1_HUMAN	18	16	14	16	19	28	25	21	36	31	28	24	27	33	34	34
PRS6A_HUMAN	12	9	8	12	18	17	19	18	19	17	18	20	11	19	20	19
PSMD3_HUMAN	16	10	13	15	21	22	23	23	28	28	15	22	27	23	28	22
RAB1B_HUMAN	11	6	5	11	16	16	16	12	20	20	16	10	18	16	22	20
RMXL1_HUMAN	8	6	6	8	13	14	10	14	15	10	14	9	14	13	15	14
DDX17_HUMAN	41	24	27	30	50	55	51	48	68	53	49	58	55	56	58	60
RAB7A_HUMAN	7	3	3	4	9	12	15	8	10	7	9	8	10	12	8	12
SF3B3_HUMAN	16	6	8	16	15	18	23	22	25	26	21	14	17	25	26	29
XPO2_HUMAN	29	18	20	24	33	37	35	39	48	47	34	30	31	48	46	48
HUWE1_HUMAN	17	12	10	13	29	21	29	30	26	25	24	32	22	31	25	30
H2BFS_HUMAN	67	53	69	75	99	82	113	91	135	123	103	108	92	115	138	144
FOXK1_HUMAN	0	0	0	0	1	2	1	1	1	0	1	1	0	2	1	1
BT3L4_HUMAN	0	0	0	0	1	1	1	2	1	0	1	1	1	0	1	1
DYST_HUMAN	1	2	1	2	3	4	5	3	2	2	4	4	2	2	3	2
RAB5B_HUMAN	4	4	3	4	5	8	7	6	7	6	7	8	7	6	8	9
HDHD2_HUMAN	2	1	0	2	2	4	3	2	4	2	3	2	3	3	4	3
PSMD6_HUMAN	6	8	5	8	7	13	12	12	11	9	11	10	14	12	15	13
RAD21_HUMAN	1	1	0	0	1	2	2	2	2	2	2	2	1	2	2	2
PININ_HUMAN	1	0	0	2	2	2	2	2	2	2	2	2	1	3	0	1
CDK12_HUMAN	2	1	1	1	2	2	4	2	3	3	3	2	2	4	3	2
PMVK_HUMAN	1	1	1	2	3	3	2	1	4	4	1	1	1	3	3	6
FGFR3_HUMAN	2	1	1	1	2	2	4	2	3	3	3	2	2	4	3	2
CDK18_HUMAN	2	1	1	1	2	2	4	2	3	3	3	2	2	4	3	2
BLK_HUMAN	2	1	1	1	2	2	4	2	3	3	3	2	2	4	3	2
RBMX_HUMAN	19	12	13	19	26	30	25	27	32	24	28	23	27	27	29	29
AN32A_HUMAN	13	7	13	16	11	17	17	17	38	34	21	10	17	16	26	35
RAGP1_HUMAN	4	2	4	2	4	6	2	6	8	4	6	4	8	7	4	3
H2B3B_HUMAN	59	47	63	67	85	72	99	78	120	110	90	95	84	100	121	130
PRS4_HUMAN	10	8	7	6	13	17	13	15	11	15	15	11	13	11	12	17
PUM1_HUMAN	0	0	0	0	0	0	1	1	1	1	1	0	1	0	1	1
MPU1_HUMAN	0	0	0	0	0	1	0	0	0	0	0	1	0	1	2	1
ABI1_HUMAN	0	0	0	0	0	2	1	0	0	1	0	1	0	2	1	0
PITH1_HUMAN	0	0	0	0	0	2	0	0	0	1	0	1	0	1	1	2
ATCAY_HUMAN	0	0	0	0	2	1	1	0	1	1	0	1	0	0	1	0
LIGO1_HUMAN	0	0	0	0	2	0	2	0	0	1	0	2	0	0	0	1
TB10B_HUMAN	0	0	0	0	1	1	2	0	1	2	0	0	0	0	1	0
ATP9A_HUMAN	0	0	0	0	1	1	2	1	0	0	0	2	0	0	0	1
DIP2C_HUMAN	0	0	0	0	1	1	1	0	0	1	1	0	0	0	1	2
DI3L2_HUMAN	0	0	0	0	0	1	1	0	0	1	1	2	0	0	1	1
HMOX2_HUMAN	0	1	0	1	2	1	3	0	2	1	1	2	1	2	2	1
MTA3_HUMAN	0	1	0	1	1	1	2	2	1	2	1	1	1	2	1	2
USP9Y_HUMAN	2	1	4	1	3	6	3	4	6	5	4	5	5	5	6	5
GUAA_HUMAN	6	7	3	5	5	10	13	9	13	13	11	10	5	11	12	8
LC7L3_HUMAN	0	0	0	0	1	1	1	1	0	1	0	1	0	0	0	1
FA50A_HUMAN	0	0	0	0	0	1	1	0	1	1	1	0	0	1	1	1
THY1_HUMAN	0	0	0	0	0	2	1	1	1	1	1	1	0	0	0	0
EXOC2_HUMAN	0	0	0	0	1	1	0	1	0	0	1	1	0	0	1	2
DNJC8_HUMAN	1	1	1	1	2	3	2	2	2	2	2	2	2	2	3	3
UBXN7_HUMAN	0	0	0	0	1	1	0	0	1	0	1	1	1	1	0	1
DBR1_HUMAN	0	0	0	0	0	0	1	0	2	2	1	1	0	0	0	1
RSF1_HUMAN	0	0	0	0	0	1	1	1	0	1	2	0	0	1	1	0
VPS52_HUMAN	0	0	0	0	1	1	0	2	1	0	1	1	0	0	0	1
WNK2_HUMAN	0	0	0	0	0	2	0	0	0	0	1	3	0	1	0	1
AP2A1_HUMAN	16	13	6	12	22	28	22	21	18	26	26	17	16	20	19	18
UBA1_HUMAN	75	62	55	67	109	117	123	113	107	117	112	109	107	123	120	108
STRBP_HUMAN	9	6	5	6	11	14	8	13	11	11	10	10	11	9	10	8
KCC2G_HUMAN	7	8	8	9	13	15	15	15	12	15	14	15	16	13	12	11
CDK1_HUMAN	2	1	2	1	2	2	5	2	3	3	3	2	2	5	3	2
PRDX2_HUMAN	29	22	26	30	45	40	46	36	57	49	50	43	43	46	53	54
SEC62_HUMAN	1	0	0	2	1	2	2	1	2	2	1	2	2	2	2	2
VPS4A_HUMAN	3	2	2	2	3	4	4	4	6	4	5	4	1	4	6	5
SART3_HUMAN	5	3	4	5	7	6	9	8	13	10	5	7	8	9	8	11
GGA1_HUMAN	1	0	0	0	1	2	1	1	1	1	1	0	2	0	2	2
RNBP6_HUMAN	4	3	1	6	7	8	6	8	7	6	8	6	4	9	8	6
IPO7_HUMAN	10	9	6	6	11	14	10	13	17	16	13	9	14	15	16	13
2AAA_HUMAN	29	23	31	21	41	44	34	43	54	55	45	45	50	39	46	43
TIF1B_HUMAN	33	26	20	27	38	35	50	42	48	55	43	38	39	54	54	50
PAP1M_HUMAN	0	0	2	1	1	1	2	1	2	2	2	2	2	2	2	2
DDX5_HUMAN	27	21	25	22	41	32	36	35	47	40	34	43	34	41	41	39
CYBP_HUMAN	5	4	4	6	8	10	10	9	11	10	10	9	7	10	9	13
CNDP2_HUMAN	10	9	8	6	8	20	15	14	9	11	14	16	20	12	13	10
ELAV1_HUMAN	13	8	7	11	17	17	21	15	23	22	14	19	15	17	24	24
FIS1_HUMAN	1	1	1	1	2	4	2	1	2	2	3	2	2	1	2	2
IF4A3_HUMAN	13	7	8	10	18	15	20	10	24	20	16	14	15	19	24	21
RL36_HUMAN	0	0	1	0	1	1	1	1	1	1	0	1	0	1	1	2
BSCL2_HUMAN	0	0	0	0	1	2	0	1	1	1	1	1	1	0	2	0
DPP3_HUMAN	8	5	4	6	13	13	10	13	13	9	8	11	9	11	10	6
TIGAR_HUMAN	0	1	0	0	1	1	1	0	1	1	0	0	1	0	2	2
ATLA2_HUMAN	0	0	0	0	0	1	2	0	1	2	1	0	1	0	2	1
CHM1A_HUMAN	0	0	0	1	1	0	1	2	0	1	1	0	2	1	1	1
RFC3_HUMAN	0	0	0	0	1	0	1	1	2	1	0	0	0	0	2	2
G3P_HUMAN	111	92	78	95	131	157	144	162	164	132	155	119	170	155	211	174
CHD3_HUMAN	2	0	2	2	3	2	4	2	4	6	2	3	3	1	5	6
ZC3HF_HUMAN	0	0	1	1	1	1	2	2	1	0	0	1	2	1	3	2
ARPC4_HUMAN	5	4	4	8	8	10	8	9	9	10	10	8	9	8	8	12
HNRPK_HUMAN	65	57	62	62	90	96	102	92	114	110	99	99	89	107	107	108
RHOA_HUMAN	8	4	9	10	9	17	8	12	14	15	14	8	15	10	22	17
GABPA_HUMAN	1	1	0	1	1	2	2	2	2	2	2	1	2	2	2	2
TNPO2_HUMAN	8	1	3	4	7	10	8	9	11	11	5	5	6	8	8	8
TCPZ_HUMAN	39	38	42	49	66	64	73	67	76	75	66	66	64	73	78	74
VAPA_HUMAN	10	5	7	7	11	16	12	10	7	13	15	10	13	16	12	15
PRP31_HUMAN	1	1	2	2	3	4	6	3	4	4	3	2	3	3	4	4
AP1B1_HUMAN	18	9	7	14	20	24	15	22	19	24	15	23	17	22	16	20
PSB2_HUMAN	3	2	1	2	3	6	3	2	4	3	5	2	4	3	8	4
SRP54_HUMAN	3	2	0	3	4	4	5	4	4	4	3	4	6	4	5	7
TCPW_HUMAN	6	5	5	7	12	9	11	10	12	11	9	9	10	12	12	11
RFA1_HUMAN	4	2	1	3	3	4	7	4	9	9	4	2	5	4	5	7
DNJB1_HUMAN	4	2	2	3	6	5	5	5	8	8	5	6	4	5	6	7
H15_HUMAN	23	17	20	26	28	27	38	33	41	40	33	31	27	35	40	35
HDGF_HUMAN	4	3	2	6	4	4	5	5	7	10	8	3	10	6	10	11
ATP5H_HUMAN	5	3	1	7	7	7	6	5	10	8	7	8	6	2	10	10
H31_HUMAN	31	24	27	38	48	46	54	39	57	48	43	44	40	52	59	57
PSD13_HUMAN	6	7	5	5	7	13	6	6	9	8	11	9	15	13	23	13
HNRPQ_HUMAN	24	15	19	15	24	22	23	30	40	33	26	24	29	30	31	33
EDC3_HUMAN	0	0	0	0	0	1	0	0	1	1	0	0	1	2	1	0
GCSP_HUMAN	0	0	0	0	0	0	0	0	2	1	0	0	0	1	1	2
MARK2_HUMAN	0	0	0	0	1	1	1	1	0	0	0	2	0	0	1	0
DCTN6_HUMAN	0	0	0	0	0	0	1	0	2	0	1	0	0	0	2	1
CEND_HUMAN	0	0	0	0	0	1	0	0	0	0	1	0	0	1	2	2
OPTN_HUMAN	0	0	0	0	0	1	1	0	0	0	1	3	0	0	1	0
CLVS1_HUMAN	0	0	0	0	0	1	0	1	0	0	3	0	0	1	0	1
AUXI_HUMAN	0	0	0	0	1	2	1	1	0	0	0	2	0	0	0	0
AGRL3_HUMAN	0	0	0	0	0	0	2	2	0	0	2	0	1	0	0	0
RLGPB_HUMAN	0	0	0	0	1	0	0	0	0	2	0	1	0	2	0	1
RB3GP_HUMAN	0	1	0	1	2	0	2	2	4	2	1	2	0	2	1	2
GALE_HUMAN	0	0	0	0	1	0	1	1	0	1	0	1	0	0	1	0
ZPR1_HUMAN	0	0	0	0	0	0	1	1	1	1	0	0	0	1	1	1
NDUB9_HUMAN	1	0	0	1	1	0	1	0	2	2	1	1	1	1	1	2
MPP6_HUMAN	0	0	0	0	2	0	1	0	2	1	0	0	0	0	0	1
DDX1_HUMAN	19	11	16	18	19	29	25	26	31	33	28	20	24	30	32	27
CAZA2_HUMAN	8	6	10	5	12	13	7	13	14	14	12	12	13	10	16	16
YTHD3_HUMAN	1	1	0	0	1	1	1	2	0	2	1	0	2	2	1	1
YTHD1_HUMAN	1	1	0	0	1	1	1	2	0	2	1	0	2	2	1	1
YTDC1_HUMAN	0	0	0	0	0	1	1	0	0	2	0	0	0	1	1	1
ZN638_HUMAN	0	0	0	0	1	0	1	2	0	0	0	0	0	1	0	2
EI2BD_HUMAN	0	0	0	0	0	0	0	1	1	2	0	0	0	1	1	1
STRP1_HUMAN	0	0	0	0	0	1	0	1	1	1	0	2	0	0	0	1
PB1_HUMAN	0	0	0	0	0	0	2	0	1	1	0	1	0	1	1	0
DNPEP_HUMAN	3	3	3	3	1	3	2	1	3	3	2	2	3	1	2	2
GT251_HUMAN	5	2	3	4	3	2	2	2	1	1	2	1	1	1	1	2
MYH14_HUMAN	19	18	17	19	10	10	10	11	9	9	7	11	10	9	9	11
SPEE_HUMAN	5	4	7	6	3	3	1	4	4	4	3	2	4	3	3	2
CO4A2_HUMAN	7	7	5	7	3	5	2	8	4	5	6	2	3	1	4	5
NU107_HUMAN	2	2	2	2	1	0	0	2	3	1	1	1	1	1	2	1
TMM43_HUMAN	4	6	4	7	4	4	5	4	2	1	2	4	3	5	5	3
AGM1_HUMAN	8	6	3	9	2	7	3	5	3	3	5	2	5	3	3	5
GSHB_HUMAN	9	8	7	7	3	4	5	7	6	6	8	6	5	5	3	5
CSN7A_HUMAN	2	1	1	2	1	1	0	1	0	1	1	0	1	0	0	0
SAHH_HUMAN	37	33	36	46	22	23	27	22	34	26	26	19	23	25	25	28
UGDH_HUMAN	23	15	12	13	16	1	10	8	10	11	6	10	8	10	8	9
STML2_HUMAN	5	3	5	8	2	3	1	4	3	5	3	2	5	2	5	2
RSU1_HUMAN	1	1	0	0	0	0	0	0	0	0	0	0	0	0	0	0
OSBP2_HUMAN	1	1	1	0	0	0	0	0	0	0	0	0	0	0	0	1
LRP1B_HUMAN	1	2	1	0	0	0	0	1	0	0	0	1	0	1	0	0
SC65_HUMAN	1	1	1	1	0	0	0	0	0	0	0	0	0	0	0	0
DDRGK_HUMAN	1	0	0	1	0	0	0	0	0	0	0	0	0	0	0	0
FHL3_HUMAN	1	1	1	0	0	0	0	0	0	0	0	0	0	0	0	0
TM109_HUMAN	2	2	3	2	1	1	1	1	1	0	1	1	2	1	1	1
FAAA_HUMAN	2	1	1	1	0	1	0	1	0	0	2	1	2	0	0	0
RPE_HUMAN	1	1	1	1	0	0	0	0	1	0	0	0	0	0	1	1
NUBP1_HUMAN	2	1	1	1	0	0	0	1	0	0	1	0	1	0	0	0
METH_HUMAN	1	1	1	1	0	1	0	0	0	1	0	1	0	0	0	0
RBP2_HUMAN	4	4	3	6	1	2	3	3	2	2	0	2	1	4	1	3
SYRC_HUMAN	18	14	14	13	6	8	8	6	11	10	9	8	6	10	12	11
ANXA5_HUMAN	66	49	47	56	38	33	23	36	24	18	44	26	49	30	31	25
ACOC_HUMAN	15	11	12	17	4	11	1	10	9	10	9	6	8	6	6	12
ACSA_HUMAN	2	0	1	2	0	1	0	0	1	2	1	0	0	0	1	0
RL11_HUMAN	10	8	8	9	3	5	5	5	6	2	4	4	6	4	5	6
CALU_HUMAN	9	6	6	9	4	6	5	3	4	4	5	5	5	5	4	6
RINI_HUMAN	20	16	20	21	8	11	6	11	14	10	10	7	10	12	14	13
COQA1_HUMAN	1	1	2	2	1	0	0	1	0	0	0	0	0	0	0	0
CTL2_HUMAN	3	4	3	3	1	4	0	2	0	1	3	2	2	2	1	1
SPTC2_HUMAN	2	1	1	1	0	0	2	0	1	0	0	1	0	0	0	0
CAN1_HUMAN	12	8	8	9	4	7	4	5	7	5	4	6	7	3	4	3
VAT1L_HUMAN	18	19	10	19	14	6	15	6	7	7	4	10	6	5	8	11
PKCB1_HUMAN	1	1	1	1	0	0	0	0	0	0	0	0	0	1	0	0
LMAN2_HUMAN	6	8	6	5	7	4	1	3	1	2	3	3	4	2	2	2
AMPB_HUMAN	8	6	3	6	2	2	3	3	3	1	3	3	6	3	4	4
ANXA7_HUMAN	8	7	6	8	3	3	1	3	5	4	4	2	4	3	2	3
MLEC_HUMAN	8	4	5	6	3	4	4	3	3	4	3	2	3	5	4	2
CHID1_HUMAN	4	4	3	4	0	2	1	3	1	2	1	2	3	0	2	2
CD9_HUMAN	6	3	2	4	2	4	2	4	0	0	4	3	3	1	1	0
ZCHC3_HUMAN	1	2	1	3	1	0	0	1	1	1	0	0	0	0	0	0
FLNA_HUMAN	150	153	104	140	77	87	48	104	66	66	111	76	125	80	85	85
ALBU_HUMAN	44	52	53	45	29	23	28	30	29	28	28	26	25	24	21	20
GCN1_HUMAN	18	19	15	20	8	8	11	8	12	12	10	12	8	15	14	11
NOC2L_HUMAN	2	1	0	1	0	0	0	0	1	1	0	0	0	0	0	0
ADPGK_HUMAN	1	0	1	2	0	0	0	0	0	0	0	1	0	0	1	0
GMPPA_HUMAN	1	1	1	1	0	0	0	0	0	0	0	0	0	0	0	0
NDUA8_HUMAN	2	1	1	1	0	0	0	0	0	0	0	1	0	0	0	1
MRE11_HUMAN	1	1	1	2	0	0	0	0	0	1	0	0	0	0	0	0
XPOT_HUMAN	7	6	4	5	2	3	4	2	4	3	2	1	0	4	2	6
CO4A6_HUMAN	1	1	0	1	0	0	0	0	0	0	0	0	0	0	0	0
MTAP_HUMAN	1	1	1	2	0	0	0	0	0	0	1	0	0	2	2	1
LYAG_HUMAN	4	3	2	5	0	1	3	2	1	1	3	1	3	0	1	2
CKAP4_HUMAN	79	56	44	64	54	38	46	40	27	24	40	45	30	38	29	29
LAMB1_HUMAN	213	241	193	214	147	118	106	186	122	135	160	50	123	84	108	133
COPB2_HUMAN	15	17	10	17	11	11	10	6	10	10	9	6	5	8	6	7
STAT1_HUMAN	2	1	0	1	0	0	0	1	0	0	1	0	1	1	0	0
K2C1_HUMAN	26	19	39	37	17	13	17	17	20	8	13	16	36	14	16	10
ECHA_HUMAN	44	29	32	35	17	16	6	20	25	12	22	15	30	14	12	14
GYS1_HUMAN	5	5	7	5	2	3	3	4	2	1	2	2	1	1	2	4
SEPT9_HUMAN	23	22	24	27	11	12	9	13	15	13	13	8	11	12	8	16
LAMC1_HUMAN	185	201	172	205	142	112	90	150	111	119	139	44	108	70	90	117
RBMS1_HUMAN	1	0	1	1	0	0	0	0	0	0	0	0	0	0	0	0
TMTC3_HUMAN	1	0	1	1	0	0	0	0	0	0	0	0	0	0	0	0
MYL6_HUMAN	24	21	18	22	9	9	6	9	10	8	11	10	9	8	14	16
GSTO1_HUMAN	6	3	3	4	3	1	0	2	4	4	3	3	2	1	0	2
ERP44_HUMAN	13	10	7	9	5	4	5	4	3	4	3	5	4	4	5	4
SYIC_HUMAN	18	15	7	12	6	6	4	10	7	8	8	8	4	10	12	9
ARL1_HUMAN	2	1	1	2	0	1	0	0	0	0	1	0	1	0	0	0
CNN3_HUMAN	6	5	8	9	3	4	3	5	0	3	5	1	5	3	6	4
SBDS_HUMAN	6	4	4	5	1	2	1	2	2	3	3	3	2	2	1	2
SEC13_HUMAN	1	1	1	2	0	2	1	0	0	1	0	0	0	1	1	2
PDIA1_HUMAN	99	80	74	77	54	46	44	43	36	33	45	39	46	44	45	37
RBGPR_HUMAN	3	3	1	4	0	1	2	0	2	1	0	1	0	0	1	2
LRP1_HUMAN	39	32	25	35	27	26	22	19	10	14	16	19	12	20	23	14
PDLI5_HUMAN	4	3	4	3	1	1	1	2	0	0	3	1	4	2	2	1
AT2A2_HUMAN	42	36	62	56	16	35	25	25	29	31	27	31	25	21	20	22
NIBA1_HUMAN	1	1	0	1	0	0	0	0	0	0	0	0	0	0	0	0
ABHEB_HUMAN	1	1	1	1	0	0	0	0	0	0	0	0	0	0	0	0
SPHM_HUMAN	1	0	1	1	0	0	0	1	0	0	0	0	0	0	0	0
COIA1_HUMAN	22	21	18	21	11	13	9	19	6	7	15	10	10	10	7	20
MYPN_HUMAN	1	1	2	1	0	0	0	0	0	0	0	0	0	0	0	0
PLCL1_HUMAN	2	2	3	3	0	3	0	0	0	1	0	0	0	0	1	2
AMPL_HUMAN	17	11	12	15	3	4	5	7	6	6	8	4	13	6	3	5
AT2A3_HUMAN	13	9	17	12	3	9	5	5	7	8	5	6	7	7	4	5
NEST_HUMAN	67	70	110	91	24	58	36	69	4	10	65	28	86	74	72	15
3HIDH_HUMAN	4	2	1	3	1	1	1	2	0	0	1	2	2	0	1	0
PLBL2_HUMAN	3	2	1	2	0	2	0	1	0	1	3	0	0	1	2	0
RRP5_HUMAN	2	1	1	1	0	0	0	1	1	0	0	0	0	0	0	1
LDHA_HUMAN	46	32	38	42	22	32	22	36	11	12	33	17	28	22	17	16
ACTN1_HUMAN	68	62	54	64	22	44	11	52	15	11	48	20	69	21	15	11
TRFL_HUMAN	1	2	1	1	1	0	0	1	0	0	0	0	0	0	0	0
ACTN4_HUMAN	95	84	66	82	44	47	25	48	29	29	47	34	59	38	37	29
ACOT9_HUMAN	2	3	3	4	1	1	0	0	3	3	0	2	2	0	0	1
MOB1A_HUMAN	3	3	4	4	1	1	0	2	1	1	2	1	2	1	1	2
THIM_HUMAN	17	7	8	10	2	4	1	9	5	3	8	3	7	2	6	4
K2C3_HUMAN	10	6	9	7	5	4	3	5	6	1	4	3	5	2	3	1
ARSB_HUMAN	1	1	0	1	0	0	0	0	0	0	0	0	0	0	0	0
FUCO_HUMAN	3	3	1	2	1	1	0	1	0	0	1	1	0	0	1	1
K2C79_HUMAN	10	7	10	7	5	4	4	5	7	1	4	3	5	2	2	1
MYADM_HUMAN	1	1	2	2	1	1	0	1	0	0	0	1	0	0	0	0
EPIPL_HUMAN	2	2	2	2	0	0	0	0	0	0	1	1	1	0	0	0
SC23A_HUMAN	26	21	21	25	12	10	12	15	11	9	13	11	10	7	7	13
PTBP3_HUMAN	7	5	2	3	2	0	0	3	4	2	1	2	2	1	1	3
PDC6I_HUMAN	26	23	14	23	12	6	7	11	16	15	9	9	9	9	10	8
TPM3_HUMAN	41	30	44	40	19	16	18	12	17	14	14	15	16	12	18	17
ESYT1_HUMAN	7	6	8	9	6	3	5	4	1	1	4	4	2	4	1	1
PAXI_HUMAN	1	1	1	2	0	0	0	0	0	0	0	0	0	0	0	1
SFRP2_HUMAN	1	1	0	1	0	0	0	0	0	0	0	0	0	0	0	0
K1C16_HUMAN	8	4	7	8	3	3	3	3	4	2	3	3	7	2	3	1
CTL1_HUMAN	1	1	0	1	0	0	0	0	0	0	0	0	0	0	0	0
LMAN1_HUMAN	12	7	6	10	8	4	3	5	1	1	4	3	5	5	2	3
CAN2_HUMAN	12	11	7	10	8	6	0	7	0	1	8	3	5	6	5	2
ARK72_HUMAN	12	8	6	8	4	2	3	4	2	3	7	3	4	1	3	7
E41L2_HUMAN	4	5	2	3	2	0	0	0	1	1	0	0	0	0	0	2
KAD2_HUMAN	14	7	6	8	4	3	3	3	4	2	5	5	2	3	3	4
EHD2_HUMAN	3	1	5	3	1	1	1	1	1	1	1	1	1	1	1	1
PBIP1_HUMAN	1	2	1	1	0	0	0	0	0	0	0	1	0	0	0	0
CATB_HUMAN	11	4	2	7	3	1	2	2	2	2	3	3	2	4	5	2
K22O_HUMAN	12	7	11	9	5	4	3	6	7	1	4	3	6	2	3	1
KCD12_HUMAN	11	10	18	16	6	6	0	7	1	2	12	1	9	1	1	7
K2C4_HUMAN	9	8	9	9	4	4	2	6	4	1	4	2	8	2	3	2
K1C14_HUMAN	8	4	6	8	3	3	3	3	4	2	3	3	7	2	2	1
PALLD_HUMAN	1	2	3	1	0	0	0	1	0	0	0	0	0	0	0	0
LAMP1_HUMAN	2	0	2	2	0	0	0	0	0	0	0	0	0	0	0	0
DECR_HUMAN	15	8	10	13	6	3	5	8	4	2	6	6	8	6	3	6
SUCB2_HUMAN	11	5	2	6	3	2	1	3	3	1	2	1	3	1	2	1
K2C5_HUMAN	12	8	12	9	5	4	4	7	7	1	4	4	7	2	3	1
LAMA1_HUMAN	161	175	149	140	100	78	59	111	68	86	92	22	65	49	60	84
K22E_HUMAN	17	7	14	14	4	5	6	6	14	1	2	6	8	2	5	1
STAT3_HUMAN	4	5	3	1	3	2	0	2	0	0	1	0	0	2	0	1
PGM1_HUMAN	24	22	13	22	8	8	3	8	14	8	5	5	6	2	4	13
CHSTE_HUMAN	2	2	1	3	0	1	1	0	0	0	1	1	1	0	0	1
TPM4_HUMAN	38	37	44	43	19	17	19	11	15	13	17	14	17	12	18	18
BDH2_HUMAN	6	2	3	3	1	1	1	1	0	1	2	1	1	3	3	1
MA2B2_HUMAN	1	1	0	1	0	0	0	0	0	0	0	0	0	0	0	0
RRAS_HUMAN	1	0	1	0	0	0	0	0	0	0	0	0	0	0	0	0
MOGS_HUMAN	6	2	2	3	2	2	2	1	1	1	1	0	0	1	0	1
TXND5_HUMAN	9	10	8	13	3	3	2	4	2	3	3	3	3	3	4	3
SIAS_HUMAN	7	9	6	11	4	3	4	2	5	2	3	2	3	2	3	3
STOM_HUMAN	2	1	2	0	0	0	0	0	0	0	0	0	0	0	0	0
CAP2_HUMAN	10	9	11	9	1	3	1	2	8	7	2	3	2	1	3	7
PLD3_HUMAN	11	10	10	8	6	2	3	3	3	3	2	4	3	3	4	4
MAGD2_HUMAN	5	2	5	7	0	2	1	3	0	2	3	0	3	2	3	2
QORX_HUMAN	3	3	6	4	3	0	0	2	0	0	1	2	2	0	0	1
PRDX6_HUMAN	50	44	61	52	17	19	11	25	20	14	26	13	22	21	22	26
HSPB1_HUMAN	38	34	47	42	9	19	7	18	15	11	23	11	30	13	17	18
MEST_HUMAN	6	5	6	5	5	3	3	2	0	0	1	0	2	2	1	0
GFPT2_HUMAN	5	4	6	4	2	0	2	2	1	4	1	1	0	1	1	1
HSPB2_HUMAN	2	1	1	2	0	0	0	0	0	0	0	0	0	0	0	0
KCTD8_HUMAN	2	3	1	1	0	0	0	0	0	0	1	0	0	0	0	0
GNS_HUMAN	9	11	4	8	3	6	1	4	1	1	4	3	3	1	4	1
K1C17_HUMAN	5	3	5	6	2	2	1	2	1	1	2	2	4	1	1	1
ECM29_HUMAN	9	5	4	8	3	3	3	2	2	2	3	3	2	3	3	3
SC31A_HUMAN	27	17	13	23	14	8	6	12	8	7	9	5	7	10	11	10
SPON1_HUMAN	2	1	1	2	0	1	0	0	0	0	3	0	0	0	0	0
STK25_HUMAN	2	3	6	3	0	1	0	0	1	1	0	0	0	1	1	1
OFUT1_HUMAN	5	3	3	5	1	3	1	2	2	1	3	1	2	1	1	1
SSRA_HUMAN	2	1	2	3	0	0	0	0	0	0	0	0	1	0	0	0
GLUCM_HUMAN	3	2	0	3	0	0	0	1	0	0	1	1	1	0	0	0
FIBB_HUMAN	6	4	5	6	2	1	1	3	3	1	3	1	2	1	1	3
EMAL4_HUMAN	8	6	4	8	5	1	5	1	1	2	2	2	1	2	2	2
DIK2A_HUMAN	1	2	1	3	0	0	0	0	0	0	0	0	0	0	0	0
PYC_HUMAN	2	4	6	6	0	0	1	1	4	1	1	1	2	1	0	5
GOT1B_HUMAN	4	2	2	2	0	0	0	1	0	1	0	0	0	0	1	1
K2C72_HUMAN	5	3	4	5	2	1	1	2	1	0	1	2	2	0	0	0
K2C74_HUMAN	5	3	4	5	2	1	1	2	1	0	1	2	2	0	0	0
K2C71_HUMAN	5	3	4	5	2	1	1	2	1	0	1	2	2	0	0	0
KTN1_HUMAN	17	14	10	21	3	6	3	12	4	4	4	5	9	5	7	8
K2C75_HUMAN	12	9	12	9	5	4	4	5	6	1	4	3	6	2	2	1
IVD_HUMAN	6	4	3	5	2	2	0	3	1	2	3	2	3	0	0	0
DCUP_HUMAN	4	1	4	4	0	2	0	2	1	1	0	0	2	0	3	0
MYH9_HUMAN	134	165	85	141	47	45	42	76	52	40	59	73	56	41	55	53
FIBG_HUMAN	5	3	2	3	0	1	0	1	0	2	1	0	1	1	0	3
TM9S4_HUMAN	3	4	0	4	2	1	1	0	1	2	1	2	1	0	0	0
SYNP2_HUMAN	2	1	3	1	0	0	0	0	0	0	0	0	0	0	0	0
GDN_HUMAN	4	4	2	3	0	2	0	9	0	0	3	0	0	0	0	0
UFD1_HUMAN	2	1	1	2	0	0	0	0	0	0	0	0	0	0	0	0
CAH2_HUMAN	26	26	17	20	12	2	4	10	4	2	4	12	9	6	7	13
DAG1_HUMAN	2	2	1	1	0	0	0	1	0	0	0	0	0	0	0	0
FABPH_HUMAN	1	2	3	2	0	0	0	0	0	0	0	0	0	0	1	0
SMYD1_HUMAN	1	2	4	2	0	0	0	0	0	0	0	0	0	0	0	0
PACN2_HUMAN	2	2	1	3	1	1	0	1	0	0	0	0	0	1	0	0
IQGA1_HUMAN	27	18	9	18	8	3	3	6	11	5	10	5	7	3	9	12
MIME_HUMAN	1	2	3	1	0	0	0	0	0	0	0	0	0	0	0	0
ISLR_HUMAN	1	3	3	3	0	0	0	0	0	0	0	0	0	0	0	0
TROP_HUMAN	3	1	2	4	0	0	0	2	0	0	1	0	1	0	0	0
K2C6A_HUMAN	16	10	16	12	5	4	4	8	8	1	4	4	8	2	3	1
P3H3_HUMAN	4	2	2	2	1	0	0	0	0	0	0	0	0	0	0	0
PLIN3_HUMAN	13	9	9	17	2	7	1	4	1	1	7	2	9	3	3	4
BIN1_HUMAN	12	14	23	20	10	12	8	6	3	3	9	7	3	8	4	2
K2C6B_HUMAN	16	10	16	12	5	4	4	8	8	1	4	4	8	2	3	1
PDCD4_HUMAN	7	3	3	2	2	0	2	2	1	2	1	0	0	1	0	1
K1C10_HUMAN	24	11	27	31	5	8	11	3	17	3	5	10	14	8	8	3
AL1B1_HUMAN	9	7	6	5	2	1	4	1	1	2	2	3	2	2	1	1
ANXA6_HUMAN	177	165	181	193	65	80	37	99	39	30	87	65	92	57	51	53
SAMH1_HUMAN	3	2	1	2	0	0	0	0	1	0	0	0	0	0	0	0
PDLI4_HUMAN	1	3	3	2	0	0	0	0	0	0	0	0	0	0	0	0
GALC_HUMAN	2	1	0	2	0	0	0	0	0	0	0	0	0	0	0	0
ITA7_HUMAN	1	2	3	2	0	0	0	0	0	0	0	0	0	0	0	0
ANCHR_HUMAN	1	2	3	1	0	0	1	0	0	0	0	0	0	0	0	0
ABEC2_HUMAN	2	0	2	3	0	0	0	0	0	0	0	0	0	0	0	0
MOV10_HUMAN	3	1	1	3	0	0	0	0	0	0	0	0	0	0	0	0
DJC13_HUMAN	4	2	3	6	2	1	1	0	0	1	0	3	0	0	1	1
SVIL_HUMAN	2	1	2	2	0	0	0	0	0	0	0	0	0	0	0	0
CBPQ_HUMAN	2	3	2	1	1	0	0	0	0	0	0	0	1	0	0	0
GALK1_HUMAN	5	4	4	5	1	1	1	1	1	1	2	1	1	0	1	1
FINC_HUMAN	34	40	24	37	8	4	25	0	0	0	4	0	0	4	1	0
VIGLN_HUMAN	26	17	17	25	10	9	3	10	3	5	4	6	6	7	4	10
GPX1_HUMAN	6	3	4	5	1	1	0	1	0	0	2	1	1	1	0	1
FBLN1_HUMAN	50	49	31	41	33	5	4	11	13	9	11	12	21	10	14	25
EEA1_HUMAN	3	2	3	4	0	1	1	1	0	0	1	0	0	1	0	0
K1C12_HUMAN	2	1	3	3	0	0	0	0	0	0	0	0	2	0	0	0
G6PE_HUMAN	3	0	2	3	0	0	0	0	0	0	0	0	0	0	0	0
LAMB2_HUMAN	7	7	5	6	2	2	1	3	2	2	4	1	2	2	2	2
ST1A1_HUMAN	3	2	2	2	0	0	0	0	0	0	0	0	0	0	0	0
PPIC_HUMAN	3	1	1	1	0	0	0	0	0	0	0	0	0	0	0	0
SNTB2_HUMAN	2	2	1	2	0	0	0	0	0	0	0	0	0	0	0	0
MFAP2_HUMAN	9	11	10	10	7	3	3	4	0	1	3	4	4	2	1	1
CAVN1_HUMAN	3	2	2	2	0	0	0	0	0	0	0	0	0	0	0	0
TLN2_HUMAN	14	19	17	19	5	2	6	6	4	6	4	7	3	3	5	8
KAP0_HUMAN	6	5	6	9	2	1	2	2	2	1	2	1	0	2	2	1
ITA1_HUMAN	3	0	0	1	0	0	0	0	0	0	0	0	0	0	0	0
CRTAP_HUMAN	13	9	8	11	5	3	2	3	1	2	3	3	2	2	2	2
SCMC1_HUMAN	4	5	4	3	1	1	1	1	0	0	1	0	0	0	0	1
K2C80_HUMAN	4	3	3	4	0	0	0	1	0	0	1	0	3	0	1	1
ATLA3_HUMAN	4	3	0	4	0	1	0	0	0	0	1	0	1	0	0	0
K1C15_HUMAN	9	3	5	6	2	2	1	2	1	1	2	2	4	1	2	1
LAMA5_HUMAN	16	9	6	10	4	2	2	4	3	2	3	2	3	1	4	4
FLNB_HUMAN	88	81	45	89	23	17	4	22	17	12	19	17	29	11	10	17
VINC_HUMAN	62	69	48	77	23	17	13	25	11	7	19	23	17	21	15	25
FERM2_HUMAN	8	13	7	10	2	3	1	4	2	3	2	2	8	2	1	2
PLOD3_HUMAN	5	3	1	5	1	1	1	1	0	0	0	0	0	0	0	0
FZD7_HUMAN	2	2	2	2	0	0	0	0	0	0	0	0	0	0	0	0
FZD2_HUMAN	2	2	2	2	0	0	0	0	0	0	0	0	0	0	0	0
KAD3_HUMAN	5	1	1	1	0	0	0	0	0	0	0	0	0	0	0	1
PGBM_HUMAN	147	183	148	178	67	59	45	90	15	23	121	37	39	30	24	49
K2C8_HUMAN	70	36	30	47	16	16	10	29	9	7	21	12	25	9	12	11
ATL1_HUMAN	3	0	1	3	0	0	0	0	0	0	0	0	0	0	0	0
SC24A_HUMAN	3	2	1	3	0	1	0	1	0	0	0	1	0	0	0	0
CATC_HUMAN	5	4	0	5	0	0	0	2	0	0	1	0	1	0	2	0
ANXA2_HUMAN	95	75	66	83	39	26	30	34	4	1	49	24	27	19	12	14
FBN2_HUMAN	36	54	37	45	29	4	0	6	0	0	8	2	3	2	0	2
DESM_HUMAN	88	96	100	98	22	29	19	26	14	18	30	23	31	23	24	20
NACAM_HUMAN	13	7	13	26	4	3	2	5	5	5	4	3	6	5	6	5
NXP20_HUMAN	4	2	3	2	0	0	0	0	0	0	0	0	0	0	0	0
HS12B_HUMAN	4	3	1	3	0	1	0	0	0	0	0	0	0	0	1	0
ANXA3_HUMAN	5	1	2	3	0	0	0	0	0	0	0	0	0	0	0	0
LMNA_HUMAN	121	110	99	117	37	43	27	43	2	2	48	30	52	22	17	17
BGAL_HUMAN	5	3	1	6	0	1	0	1	0	0	0	0	2	1	0	1
KLH40_HUMAN	2	2	7	3	0	0	0	0	0	0	0	0	0	0	0	0
COPG1_HUMAN	30	24	21	21	10	4	2	7	7	7	3	4	2	6	5	9
IFM1_HUMAN	3	0	1	2	0	0	0	0	0	0	0	0	0	0	0	0
NID1_HUMAN	62	64	53	67	27	16	13	21	18	15	15	6	20	10	13	16
ACTN3_HUMAN	28	26	26	23	6	7	3	7	5	3	7	6	9	5	6	4
TTHY_HUMAN	12	36	19	26	5	0	0	3	16	1	0	8	3	0	12	16
PNCB_HUMAN	5	4	2	5	0	0	0	0	4	1	2	1	0	0	0	1
ANX11_HUMAN	13	7	8	13	3	4	1	3	1	1	2	1	1	2	2	2
ILK_HUMAN	3	3	1	4	0	0	0	0	0	0	0	0	0	0	0	0
COL12_HUMAN	4	4	3	2	2	0	0	1	0	0	0	0	0	0	0	0
CLIC6_HUMAN	34	35	19	35	15	0	1	10	5	2	1	6	6	2	7	19
MYL6B_HUMAN	19	13	22	21	4	4	3	4	4	3	4	4	4	4	3	5
PPM1F_HUMAN	3	2	2	3	0	0	0	0	0	0	0	0	0	0	0	1
ERAP1_HUMAN	4	2	0	0	0	0	1	0	0	0	0	0	0	0	0	0
CPT2_HUMAN	7	2	3	6	1	0	0	1	0	0	1	0	1	0	0	0
TPM1_HUMAN	43	37	58	45	12	9	12	5	9	8	8	9	9	4	12	10
ITA6_HUMAN	3	2	4	6	0	1	0	1	1	1	2	1	1	0	0	1
NHRF1_HUMAN	4	2	1	2	0	0	0	0	0	0	1	0	1	0	0	0
KCRM_HUMAN	13	15	29	17	1	1	1	1	2	1	1	1	1	1	1	2
ITB1_HUMAN	14	18	14	18	4	2	3	3	7	3	6	3	3	2	3	5
PLTP_HUMAN	4	3	2	4	1	0	0	0	0	0	1	0	0	0	0	0
SERPH_HUMAN	108	81	63	77	47	23	11	25	7	8	27	15	20	15	9	9
SNTB1_HUMAN	4	2	1	4	0	0	0	0	0	0	0	0	0	0	0	0
IPO4_HUMAN	8	6	3	6	1	0	1	1	0	1	0	2	1	2	1	1
P3H1_HUMAN	14	11	5	10	5	1	1	1	1	0	1	1	2	1	1	1
TLN1_HUMAN	60	80	52	76	17	18	4	27	9	10	31	10	22	11	12	13
MYOZ2_HUMAN	3	1	4	3	0	0	0	0	0	0	0	0	0	0	0	0
HEXA_HUMAN	6	3	1	3	0	0	0	1	1	0	0	1	0	0	0	0
COEA1_HUMAN	22	19	11	28	4	0	0	0	0	0	0	0	0	0	0	0
TAGL_HUMAN	3	6	2	7	0	0	0	0	0	0	0	0	2	0	0	0
TNNT1_HUMAN	2	3	7	7	0	0	0	0	0	0	0	0	0	0	0	0
HEXB_HUMAN	5	2	0	4	0	0	0	0	0	0	0	0	0	0	0	0
MYO1C_HUMAN	3	2	6	5	1	0	0	0	0	0	0	0	0	0	0	0
GPX8_HUMAN	3	3	1	3	0	0	0	0	0	0	0	0	0	0	0	0
P4HA1_HUMAN	31	18	14	22	8	7	2	13	1	1	7	3	3	3	2	3
ILEU_HUMAN	2	4	2	2	0	0	0	0	0	0	0	0	0	0	0	0
ANXA1_HUMAN	28	23	17	27	5	10	2	8	1	0	10	4	7	4	2	3
LEG1_HUMAN	16	12	14	20	7	3	1	2	0	0	4	1	4	1	1	0
LDB3_HUMAN	4	2	5	4	0	0	0	0	0	0	0	0	0	0	0	0
NID2_HUMAN	68	74	50	81	29	5	7	18	8	6	10	7	10	8	14	24
AT2A1_HUMAN	32	24	43	37	4	10	5	6	7	10	8	5	6	7	8	7
GDE_HUMAN	12	10	9	15	3	5	2	1	1	0	0	2	1	2	0	2
FOLR1_HUMAN	6	2	1	5	0	0	0	0	0	0	0	0	0	0	0	0
MYPC2_HUMAN	3	2	5	5	0	0	0	0	0	0	0	0	0	0	0	0
ANXA4_HUMAN	41	18	12	29	3	3	1	2	2	1	2	1	3	2	7	13
FKBP9_HUMAN	8	6	2	5	1	0	0	0	0	0	0	0	0	0	0	0
TRFE_HUMAN	47	47	45	44	13	7	11	11	10	9	14	6	7	5	5	3
SPB6_HUMAN	12	9	6	7	0	1	0	3	0	0	2	0	1	0	0	2
SPB8_HUMAN	4	5	3	4	0	0	0	1	0	0	1	0	1	0	0	1
AHNK_HUMAN	121	98	91	105	15	26	4	45	0	0	48	9	69	8	10	1
OLFL3_HUMAN	4	3	5	3	1	0	0	0	0	0	0	0	0	0	0	0
NB5R1_HUMAN	5	3	7	6	0	0	0	0	0	0	1	1	0	0	0	1
MATN2_HUMAN	1	6	2	3	0	0	0	0	0	0	0	0	0	0	0	0
SFRP1_HUMAN	14	9	7	11	0	0	0	0	8	7	0	0	0	0	1	7
SBP1_HUMAN	13	6	7	6	0	2	0	5	0	0	5	1	4	0	0	0
MYOF_HUMAN	5	3	1	1	0	0	0	0	0	0	0	0	0	0	0	0
PLOD1_HUMAN	18	14	8	16	4	3	0	5	0	0	7	2	1	1	0	1
PXDN_HUMAN	16	24	22	25	7	3	3	3	3	3	3	1	2	3	3	3
NEXN_HUMAN	3	5	7	2	0	0	0	0	0	0	0	0	0	0	0	0
FBN1_HUMAN	66	95	54	74	44	4	0	6	0	0	8	4	3	2	1	5
TPM2_HUMAN	62	56	90	74	13	10	12	5	9	7	8	10	11	5	11	11
RET1_HUMAN	12	9	6	11	0	0	0	3	0	0	3	0	0	1	0	3
SULF1_HUMAN	3	3	1	5	0	0	0	0	0	0	0	0	0	0	0	1
HYES_HUMAN	9	4	2	2	0	0	0	0	0	0	0	0	0	0	0	0
ANAG_HUMAN	10	9	2	8	0	1	1	0	0	1	0	0	2	1	0	1
LG3BP_HUMAN	15	12	4	6	1	1	1	3	2	0	4	3	3	2	2	2
SC24D_HUMAN	11	5	2	9	1	0	0	0	0	0	0	0	0	0	0	0
PLSI_HUMAN	5	5	2	4	1	0	0	0	0	0	0	0	0	0	0	0
MYOM1_HUMAN	3	8	18	11	0	0	0	0	0	0	0	0	0	0	0	0
NADC_HUMAN	10	5	9	6	0	2	1	1	0	0	1	0	2	0	2	0
OBSL1_HUMAN	2	2	6	4	0	0	0	0	0	0	0	0	0	0	0	0
K1C18_HUMAN	32	11	12	24	4	5	2	5	1	1	4	5	6	2	3	3
PTK7_HUMAN	23	18	14	20	5	2	1	3	2	1	2	1	1	2	1	2
S10AB_HUMAN	6	5	6	6	1	0	0	0	0	0	0	0	0	0	0	0
MYH16_HUMAN	14	17	18	15	0	0	1	1	0	0	0	0	1	1	0	0
FREM1_HUMAN	3	2	0	3	0	0	0	0	0	0	0	0	0	0	0	0
TNNC1_HUMAN	2	3	7	6	0	0	0	0	0	0	0	0	0	0	0	0
TNNT3_HUMAN	7	8	16	15	0	0	0	0	0	0	0	0	0	0	0	0
MYL4_HUMAN	16	15	17	18	1	1	0	1	0	0	1	1	1	1	0	0
CALD1_HUMAN	4	14	11	9	0	0	0	0	0	0	0	1	0	0	0	0
RYR1_HUMAN	1	3	6	7	0	0	0	0	0	0	0	0	0	0	0	0
MPRI_HUMAN	13	11	14	9	1	0	0	1	0	0	0	0	0	0	0	0
LAMA4_HUMAN	7	12	9	15	3	1	3	0	0	0	2	0	0	0	0	0
EMIL1_HUMAN	39	32	28	41	13	0	0	0	0	0	0	0	0	0	0	0
PLSL_HUMAN	6	7	3	5	0	0	0	0	0	0	0	1	0	0	0	0
FKB10_HUMAN	18	10	9	13	2	0	0	1	0	0	1	0	1	0	0	0
PGM5_HUMAN	4	4	5	6	0	0	0	0	0	0	0	0	0	0	0	0
RRBP1_HUMAN	49	27	23	40	3	3	0	4	0	0	2	2	2	1	0	0
CRYAB_HUMAN	5	8	9	8	0	0	0	0	0	0	0	0	0	0	0	0
CO5A1_HUMAN	4	4	3	4	1	0	0	0	0	0	0	0	0	0	0	0
MYOM2_HUMAN	4	8	21	15	0	0	0	0	0	0	0	0	0	0	0	0
P4HA2_HUMAN	17	16	10	19	5	0	0	0	0	0	0	0	0	0	0	0
CO6A1_HUMAN	18	15	10	18	7	1	0	2	0	0	3	2	1	3	0	1
MRC2_HUMAN	14	5	1	9	0	0	0	0	0	1	0	0	0	0	0	0
FLNC_HUMAN	161	162	208	178	16	13	10	12	7	7	20	14	16	19	10	8
TNNT2_HUMAN	8	7	9	11	0	0	0	0	0	0	0	0	0	0	0	0
MYBPH_HUMAN	12	20	30	25	0	0	0	0	0	0	0	0	0	0	0	0
ACTN2_HUMAN	93	94	127	88	8	10	4	12	5	5	10	7	11	5	6	3
MYL1_HUMAN	37	38	46	43	1	1	0	1	2	1	2	1	1	1	0	1
FREM2_HUMAN	8	2	0	15	0	0	0	3	1	0	0	1	0	0	0	0
TNNI1_HUMAN	10	11	15	13	0	0	0	0	0	0	0	0	0	0	0	0
MYH7_HUMAN	159	195	250	222	1	1	1	1	1	1	1	1	1	1	1	1
CO6A2_HUMAN	12	6	3	7	5	0	0	1	0	0	0	0	0	0	0	0
CO1A2_HUMAN	39	34	27	36	9	1	0	0	0	0	0	0	0	0	0	0
MYH6_HUMAN	142	165	225	188	1	1	1	1	1	1	1	1	1	1	1	1
MYPC1_HUMAN	21	33	41	39	0	0	0	0	0	0	0	0	0	0	0	0
MYH13_HUMAN	135	170	210	177	2	1	2	2	2	1	1	1	1	1	1	2
MYH2_HUMAN	286	343	452	390	1	1	1	1	1	1	1	1	1	1	1	1
MYH3_HUMAN	681	878	1127	930	6	1	1	1	1	1	1	1	1	1	1	1
MYH1_HUMAN	271	334	434	377	1	1	1	1	1	1	1	1	1	1	1	1
CASQ2_HUMAN	9	10	20	16	0	0	0	0	0	0	0	0	0	0	0	0
MYH4_HUMAN	243	291	389	329	1	1	1	1	1	1	1	1	1	1	1	1
KLH41_HUMAN	22	25	44	29	0	0	0	0	0	0	0	0	0	0	0	0
OBSCN_HUMAN	4	6	23	15	0	0	0	0	0	0	0	0	0	0	0	0
SRCA_HUMAN	10	13	28	22	0	0	0	0	0	0	0	0	0	0	0	0
MYH8_HUMAN	431	542	744	662	1	1	1	1	1	1	1	1	1	1	1	1
TRI72_HUMAN	16	19	21	26	0	0	0	0	0	0	0	0	0	0	0	0
TITIN_HUMAN	339	550	817	728	4	2	4	2	2	2	4	3	3	4	2	3
SRPX_HUMAN	12	13	11	14	0	0	0	0	0	0	0	0	0	0	0	0
MLRS_HUMAN	41	40	56	52	0	0	0	0	0	0	0	0	0	0	0	0
DPP2_HUMAN	15	9	4	13	0	0	0	0	1	0	0	0	0	0	0	0
NEBU_HUMAN	10	20	51	29	0	0	0	0	0	1	0	0	0	0	0	0
CO1A1_HUMAN	70	43	31	65	16	0	0	0	0	0	0	0	0	0	0	0
PGS2_HUMAN	27	19	20	20	4	0	0	0	0	0	0	0	0	0	0	0
UN45B_HUMAN	16	20	44	33	0	0	0	0	0	0	0	0	0	0	0	0
POSTN_HUMAN	46	57	28	40	8	1	0	0	0	0	0	0	0	0	0	0
BGH3_HUMAN	17	11	9	11	0	0	0	0	0	0	0	0	0	0	0	0
CO6A3_HUMAN	88	64	46	84	20	3	0	0	0	0	0	2	0	0	0	0
PLST_HUMAN	27	32	18	25	1	0	0	0	0	0	0	1	0	0	0	0
CO3A1_HUMAN	62	27	22	49	8	0	0	0	0	0	0	0	0	0	0	0
ROA3_HUMAN	33	19	21	26	38	45	41	43	52	48	49	34	38	48	56	56
PUR6_HUMAN	30	13	19	22	21	36	32	34	43	39	32	23	36	41	47	42
SSBP_HUMAN	2	2	1	2	2	1	3	3	6	6	3	2	5	3	5	9
SMD3_HUMAN	2	2	4	4	5	4	4	5	7	7	4	4	6	5	9	9
CHRD1_HUMAN	1	1	0	1	1	2	2	2	2	2	3	1	2	2	2	2
PRS10_HUMAN	13	10	8	14	18	20	21	17	20	19	18	15	16	18	23	20
NAMPT_HUMAN	4	2	1	4	7	4	6	4	5	6	3	4	4	2	5	4
TCPG_HUMAN	44	33	35	41	57	67	59	48	71	67	57	58	57	62	59	64
DYH17_HUMAN	0	0	0	1	1	1	1	1	1	1	1	1	1	2	1	1
H90B4_HUMAN	21	20	17	16	28	25	29	25	31	32	27	29	26	32	32	33
DHX9_HUMAN	49	43	39	48	68	73	74	69	80	87	62	69	59	72	85	88
DHPR_HUMAN	2	1	2	2	2	3	3	1	4	4	3	1	4	3	4	7
UB2D2_HUMAN	2	2	0	2	4	3	2	3	4	3	2	2	2	3	4	5
MAK_HUMAN	3	1	1	1	2	2	4	2	3	3	3	2	2	4	3	2
NEMF_HUMAN	0	0	0	1	1	1	1	1	0	0	1	1	1	0	1	1
TBCC_HUMAN	0	0	0	1	1	0	1	1	0	1	1	0	0	1	0	2
MCES_HUMAN	2	2	1	1	3	4	4	2	3	2	1	2	1	3	5	2
STIP1_HUMAN	31	22	24	23	31	38	43	41	40	38	35	34	36	45	42	43
DHX15_HUMAN	15	15	14	16	20	17	27	22	32	27	18	19	21	32	25	23
SNRPA_HUMAN	3	3	3	2	3	5	5	3	6	4	6	3	5	5	4	6
TCPQ_HUMAN	44	41	36	48	59	65	66	58	79	79	61	65	63	63	71	65
SNAA_HUMAN	5	3	3	3	4	7	7	5	7	6	7	5	6	7	4	7
PPAC_HUMAN	3	4	5	5	7	6	6	6	5	9	6	7	4	8	13	12
RAB5A_HUMAN	4	4	4	5	5	8	6	6	9	6	8	5	10	6	8	10
COPG2_HUMAN	6	7	4	5	10	11	8	8	11	7	8	10	13	11	9	7
SKP1_HUMAN	1	1	1	1	1	1	1	1	2	2	2	1	1	1	2	1
H2A2B_HUMAN	22	19	23	24	30	26	32	31	37	36	33	26	34	33	41	42
BZW2_HUMAN	3	2	2	3	2	4	5	4	5	7	3	3	5	6	8	7
SFPQ_HUMAN	34	19	23	35	41	41	38	50	47	51	44	35	33	48	43	54
KCC2A_HUMAN	8	8	8	10	13	15	17	14	14	15	13	12	15	13	11	10
ILF3_HUMAN	38	27	26	37	41	50	49	52	56	47	50	38	46	54	57	53
HNRPU_HUMAN	67	55	49	78	89	95	102	94	105	109	86	89	90	113	108	105
CCAR2_HUMAN	12	12	11	12	14	16	22	19	16	20	16	21	13	28	17	19
NUMA1_HUMAN	24	18	19	22	22	35	30	34	52	45	35	24	36	37	32	57
FSCN1_HUMAN	58	51	49	51	82	77	87	87	84	82	86	86	85	85	86	74
TPR_HUMAN	9	8	7	10	14	10	17	16	20	12	15	13	9	21	12	12
CAND1_HUMAN	59	46	35	54	71	81	70	78	82	85	74	67	70	82	81	86
BCLF1_HUMAN	3	3	2	5	5	4	6	7	4	6	8	5	4	8	8	6
ARP3_HUMAN	11	11	11	14	16	18	17	14	21	20	20	19	18	20	23	21
HS90A_HUMAN	199	155	135	170	240	232	273	235	268	264	243	261	233	274	268	257
ARP2_HUMAN	9	5	6	9	10	13	10	9	13	12	12	11	13	9	14	11
CD47_HUMAN	3	1	1	1	2	3	3	3	3	3	1	3	3	1	2	3
H32_HUMAN	30	24	29	38	44	41	52	37	56	44	45	39	40	45	59	56
SHLB1_HUMAN	3	1	2	3	6	7	4	3	0	1	6	7	4	5	4	2
6PGD_HUMAN	40	30	36	39	39	52	39	52	59	52	58	50	60	50	63	53
ACSL3_HUMAN	5	4	6	5	11	8	10	5	7	7	6	8	5	13	8	5
RU17_HUMAN	7	4	5	3	8	7	8	8	9	13	7	4	9	5	8	11
UBP5_HUMAN	22	18	14	17	24	30	27	26	27	29	27	23	23	25	25	31
FACE1_HUMAN	0	0	0	0	0	0	0	1	1	0	0	0	1	0	2	0
AP1M2_HUMAN	0	0	0	0	1	0	1	0	0	1	1	0	0	0	1	1
PAXX_HUMAN	0	0	0	0	0	1	0	0	1	0	1	0	0	0	0	2
MICA2_HUMAN	0	0	0	0	1	1	1	1	0	1	0	0	0	1	0	0
COT1_HUMAN	0	0	0	0	0	0	1	0	1	2	0	1	0	0	1	0
SRCN1_HUMAN	0	0	0	0	1	1	1	0	0	0	0	2	0	1	0	0
AT8A1_HUMAN	0	0	0	0	0	1	0	0	0	2	1	0	0	0	1	1
UB2L3_HUMAN	0	0	0	0	0	0	0	0	1	1	1	0	2	0	0	1
SRPRB_HUMAN	1	1	0	0	0	1	1	1	1	1	1	2	1	2	2	0
LSM2_HUMAN	0	0	0	0	0	1	1	0	0	1	0	0	0	1	1	1
PLPHP_HUMAN	0	0	0	0	0	1	0	0	1	2	0	0	0	0	1	1
LRC4B_HUMAN	0	0	0	0	0	1	0	0	0	1	1	2	0	0	0	0
BROX_HUMAN	0	0	0	0	1	0	0	0	1	0	0	0	2	1	1	0
MD1L1_HUMAN	0	0	0	0	0	0	0	1	1	1	0	1	0	1	1	0
SF3B1_HUMAN	13	12	10	10	11	18	17	13	23	18	15	12	16	22	23	25
SEPT6_HUMAN	9	7	5	5	16	12	13	9	8	8	9	18	8	12	9	9
HNRH1_HUMAN	32	26	29	30	39	39	46	41	52	47	40	40	38	50	50	45
TCPH_HUMAN	41	36	36	35	45	51	53	48	57	61	50	53	51	66	52	56
TCPA_HUMAN	41	34	31	41	52	51	54	53	67	63	58	53	54	59	58	55
RTCB_HUMAN	14	10	14	14	16	17	18	17	25	21	25	18	24	26	20	25
NTF2_HUMAN	1	2	2	2	4	3	3	3	4	4	4	3	1	3	4	4
PSA1_HUMAN	11	7	8	13	14	15	16	16	15	17	14	13	17	15	17	18
NDUAD_HUMAN	1	1	1	2	2	2	2	2	3	2	2	2	2	2	2	3
DNLI3_HUMAN	3	2	1	4	5	3	5	3	8	4	3	4	3	5	3	5
H33_HUMAN	28	23	25	32	39	37	41	33	44	36	36	40	35	41	48	46
PFKAL_HUMAN	30	19	15	22	32	43	32	37	38	35	34	32	32	31	28	32
OTUB1_HUMAN	4	5	3	6	4	8	6	7	10	5	7	5	9	7	13	9
RBM25_HUMAN	3	2	1	2	3	2	6	3	4	5	3	3	2	4	5	6
RAC2_HUMAN	3	3	3	4	5	5	6	7	6	5	6	5	5	5	7	7
VPS35_HUMAN	23	12	8	15	25	25	18	21	28	24	23	20	22	20	25	26
PEBP1_HUMAN	19	10	10	15	17	20	15	22	22	21	25	18	20	19	21	27
CTBL1_HUMAN	2	1	2	3	2	2	4	2	4	3	2	5	3	3	4	3
TEBP_HUMAN	7	5	5	5	6	9	8	8	10	9	8	6	7	8	12	11
PSA3_HUMAN	10	4	6	8	7	11	8	10	13	10	8	6	14	11	11	10
APEX1_HUMAN	15	15	12	13	16	17	18	17	31	25	25	17	20	22	24	25
HNRPL_HUMAN	24	22	26	28	27	34	39	30	47	43	29	27	33	34	42	41
NUDC_HUMAN	6	8	4	7	9	10	6	10	11	8	9	7	13	9	9	7
RHOC_HUMAN	6	4	8	9	6	12	6	11	10	10	11	6	13	8	14	13
HNRPD_HUMAN	33	28	27	39	44	45	47	44	52	55	48	46	43	47	55	54
CYTB_HUMAN	1	1	1	2	3	1	2	2	3	3	3	2	1	3	3	3
PRDX1_HUMAN	32	27	30	27	29	32	29	35	61	53	39	40	41	35	49	54
PSB7_HUMAN	1	1	2	2	2	2	2	4	2	4	3	1	2	4	3	2
KCC2D_HUMAN	11	12	9	12	16	18	17	16	16	16	16	15	20	14	13	12
RAB13_HUMAN	3	2	2	3	5	5	5	4	3	4	4	2	2	5	4	4
C1TC_HUMAN	17	18	19	21	23	18	21	33	47	35	30	14	33	22	22	30
NMT1_HUMAN	3	2	1	2	2	3	5	2	2	2	3	2	3	3	3	4
PP1A_HUMAN	12	10	14	10	15	17	16	16	19	18	19	12	17	16	21	17
U520_HUMAN	17	15	15	20	23	21	28	26	28	34	24	22	21	30	38	36
CAND2_HUMAN	5	4	4	4	7	6	6	6	8	8	7	7	7	6	6	7
ARP5L_HUMAN	1	1	0	1	1	2	0	2	2	2	2	0	2	1	3	2
RU2A_HUMAN	3	2	2	3	3	4	3	3	4	5	2	2	5	6	5	8
PP1G_HUMAN	12	10	15	10	16	18	17	17	20	19	20	12	17	17	22	18
PSMD2_HUMAN	25	20	16	24	30	33	34	28	38	35	28	25	25	31	42	35
TCPD_HUMAN	45	38	37	48	59	56	62	60	66	64	53	61	56	61	64	64
PP4R1_HUMAN	0	0	0	0	0	0	0	0	1	1	0	1	0	1	0	1
LSM7_HUMAN	0	0	0	0	0	0	0	0	1	0	1	0	1	0	1	1
MT1E_HUMAN	0	0	0	0	0	0	0	0	0	1	0	0	0	0	1	1
HAP28_HUMAN	0	0	0	0	1	0	1	1	0	0	0	1	1	0	0	0
BAZ1A_HUMAN	0	0	0	0	0	0	0	1	0	0	1	1	1	0	0	0
T2EA_HUMAN	0	0	0	0	0	1	0	0	1	1	1	0	0	0	0	0
WNK1_HUMAN	0	0	0	0	0	1	0	0	1	0	1	1	0	0	1	0
RB15B_HUMAN	0	0	0	0	0	0	1	1	1	1	0	1	0	0	0	0
PYM1_HUMAN	0	0	0	0	1	1	1	0	0	0	1	0	1	0	0	0
WASL_HUMAN	0	0	0	0	0	1	1	0	1	0	0	0	1	0	1	0
SPF45_HUMAN	0	0	0	0	1	0	1	0	0	1	1	0	0	0	0	1
MFS10_HUMAN	2	1	1	1	2	2	2	2	1	2	1	2	2	2	3	2
DNJC9_HUMAN	0	0	0	0	0	1	0	0	0	0	0	0	1	0	1	1
COQ8A_HUMAN	0	0	0	0	0	1	0	0	0	1	0	0	0	1	1	1
SKIV2_HUMAN	0	0	0	0	0	1	0	1	0	0	1	0	0	1	1	0
RSMB_HUMAN	7	4	7	7	9	6	9	8	11	11	10	6	6	9	12	9
TBA4B_HUMAN	27	20	20	20	30	31	33	32	32	33	27	26	41	32	30	33
AP2B1_HUMAN	29	18	12	23	30	34	27	26	23	29	29	30	23	30	29	29
PRS6B_HUMAN	9	10	10	12	16	20	17	17	17	15	18	14	14	19	20	19
HECD4_HUMAN	1	1	2	1	2	2	2	2	3	1	1	3	1	3	1	4
XRCC5_HUMAN	59	45	44	58	68	67	86	64	92	100	73	59	58	88	80	77
ILF2_HUMAN	28	26	27	22	28	35	30	36	38	31	36	32	44	39	41	41
U2AF1_HUMAN	2	2	2	4	4	3	4	2	5	5	3	3	6	4	5	3
CTBP1_HUMAN	11	9	7	9	12	12	13	13	17	16	11	14	11	13	18	19
IF4G3_HUMAN	3	2	2	3	4	5	4	2	4	2	4	5	4	4	6	5
SUMO2_HUMAN	2	1	2	2	3	2	5	2	3	4	3	2	3	2	4	2
UBE3C_HUMAN	3	1	2	1	3	3	3	3	3	3	3	2	3	2	4	3
PRP19_HUMAN	11	9	9	11	13	13	15	15	20	17	13	13	13	18	18	16
EPMIP_HUMAN	4	3	2	5	7	7	7	7	6	5	5	5	3	6	3	6
GLYM_HUMAN	12	8	13	10	9	12	11	14	25	20	16	11	23	20	19	18
DHE3_HUMAN	16	13	10	16	12	23	13	24	19	18	27	14	26	18	13	15
DX39A_HUMAN	20	15	17	17	20	24	25	22	30	25	19	22	24	26	31	27
FKBP4_HUMAN	16	8	10	12	13	16	16	15	21	19	20	10	16	21	17	22
ROA1_HUMAN	48	44	48	48	59	67	65	68	75	66	58	57	64	72	85	85
ROA2_HUMAN	60	50	52	60	71	79	75	70	80	84	80	58	71	76	92	94
PGRC2_HUMAN	4	4	5	6	6	7	6	8	6	8	8	7	7	6	8	8
TRA2B_HUMAN	10	6	7	7	9	7	11	12	10	11	11	10	8	12	12	13
AL3A2_HUMAN	4	4	4	2	5	4	3	3	8	6	5	4	6	4	4	7
HNRDL_HUMAN	23	21	20	23	26	31	24	32	31	30	32	29	26	31	34	31
ODPA_HUMAN	9	4	6	4	7	8	7	6	10	14	8	4	7	8	8	11
G6PI_HUMAN	44	34	25	35	48	54	50	45	45	51	48	48	40	52	49	50
SYVC_HUMAN	14	15	10	17	14	15	19	18	30	29	16	14	16	22	18	28
MARE1_HUMAN	10	10	12	14	14	19	15	15	14	19	17	18	15	12	18	24
NONO_HUMAN	44	35	35	45	54	57	61	62	57	60	57	50	51	61	59	65
CALX_HUMAN	21	15	15	19	25	33	24	33	25	23	29	26	36	26	24	24
PSA4_HUMAN	9	6	8	10	12	13	10	12	14	13	14	10	11	12	14	10
XRCC6_HUMAN	50	44	45	47	62	54	66	58	72	68	60	64	56	74	69	67
TPIS_HUMAN	70	60	56	64	75	87	86	83	84	85	86	71	80	83	101	101
CYC_HUMAN	8	6	6	9	8	8	9	7	12	13	7	9	7	8	10	15
TALDO_HUMAN	19	14	16	13	19	13	21	20	27	20	23	19	26	21	22	25
SYFB_HUMAN	17	15	14	16	20	27	18	20	29	33	23	21	15	18	19	22
GDIB_HUMAN	49	36	34	41	52	62	45	54	68	67	59	60	58	52	60	54
PSA2_HUMAN	7	3	5	8	6	10	7	12	8	8	9	6	11	7	9	9
TSPO_HUMAN	0	0	0	0	0	0	0	0	0	1	1	0	0	0	0	1
IAH1_HUMAN	0	0	0	0	0	0	0	1	1	0	1	0	0	0	0	1
ZIC2_HUMAN	0	0	0	0	0	0	1	1	0	0	0	1	1	0	0	0
WRIP1_HUMAN	0	0	0	0	0	0	0	0	1	1	0	1	0	0	0	0
GNPAT_HUMAN	0	0	0	0	0	0	0	0	1	1	1	0	0	0	1	0
VGFR3_HUMAN	1	1	1	1	1	2	1	1	2	2	2	2	1	2	1	2
TIF1A_HUMAN	0	0	0	0	0	0	1	0	1	1	0	0	0	0	1	0
CRNL1_HUMAN	0	0	0	0	0	0	0	1	0	0	0	0	0	1	1	1
AGRL2_HUMAN	0	0	0	0	0	0	1	1	0	0	1	0	1	0	0	0
PAF1_HUMAN	0	0	0	0	0	0	1	0	1	0	0	0	0	0	1	1
R13P3_HUMAN	3	2	2	3	3	3	4	3	4	4	3	4	3	4	4	4
CSK2B_HUMAN	1	2	2	2	3	3	3	3	4	3	4	3	2	3	3	2
CSN5_HUMAN	2	2	1	2	2	2	2	3	3	3	3	3	4	3	4	3
PSA6_HUMAN	9	8	11	9	10	14	10	9	14	14	16	11	12	14	17	17
PUR2_HUMAN	10	10	13	9	7	14	11	13	18	17	7	11	13	18	19	19
BAX_HUMAN	2	2	2	2	2	2	2	4	3	2	5	4	4	2	3	4
ROAA_HUMAN	11	8	8	11	11	11	12	13	19	15	12	13	13	12	13	16
PPIA_HUMAN	41	36	43	44	47	51	51	47	65	60	51	56	52	52	70	68
L2GL2_HUMAN	0	0	0	0	0	0	1	0	0	0	0	1	0	1	0	1
IF5_HUMAN	5	4	5	6	6	6	6	7	6	6	5	6	6	8	10	7
RFC2_HUMAN	0	0	0	0	0	0	0	0	0	0	1	0	1	0	1	1
CCDC6_HUMAN	0	0	0	0	0	1	1	0	0	0	1	1	0	0	0	0
ASTRA_HUMAN	0	0	0	0	0	0	0	1	0	1	0	1	0	0	1	0
ARRB1_HUMAN	0	0	0	0	1	1	1	0	0	0	0	0	0	0	1	0
FAF1_HUMAN	0	0	0	0	0	1	0	0	1	0	0	1	0	1	0	0
GLYC_HUMAN	0	0	0	0	0	0	0	0	1	0	0	0	1	1	1	0
PRP8_HUMAN	23	15	14	21	21	22	26	29	26	31	22	20	22	30	35	30
HNRH2_HUMAN	24	20	20	26	28	29	33	27	34	34	32	30	27	32	32	31
BASI_HUMAN	6	4	4	6	5	9	6	8	6	10	8	5	6	8	9	10
PPME1_HUMAN	6	4	5	6	5	8	7	7	7	7	8	6	5	5	7	9
HS904_HUMAN	33	27	23	26	35	33	37	34	44	37	31	39	37	39	40	41
ATPO_HUMAN	12	6	8	8	12	11	12	5	13	13	10	14	9	7	14	13
PP1B_HUMAN	12	11	14	11	17	18	16	13	17	18	18	12	15	14	21	15
TCPB_HUMAN	56	43	51	49	53	54	61	60	74	78	63	53	65	59	68	69
RADI_HUMAN	62	51	34	51	44	81	36	83	70	51	91	50	88	60	78	61
GDIR1_HUMAN	10	10	7	11	10	15	9	13	13	14	15	8	16	11	15	18
CISY_HUMAN	19	12	13	15	16	22	19	18	22	22	19	17	20	17	23	22
PRKDC_HUMAN	116	92	88	109	129	128	148	137	127	140	121	128	122	176	150	144
IST1_HUMAN	4	4	2	3	4	5	4	4	4	5	6	5	3	5	7	4
HNRPF_HUMAN	19	13	10	14	15	15	17	17	19	20	19	14	19	17	18	23
NELFB_HUMAN	1	1	1	1	1	1	1	3	2	2	1	1	2	2	2	1
DX39B_HUMAN	30	21	26	26	29	33	33	31	42	35	31	33	34	39	41	36
DLDH_HUMAN	18	12	10	15	16	18	13	16	18	16	18	18	15	16	21	19
ODO2_HUMAN	11	7	6	8	10	12	9	10	11	12	11	11	10	10	9	11
VDAC2_HUMAN	27	18	20	22	24	30	26	22	33	27	31	27	29	28	31	29
MK08_HUMAN	2	2	2	2	3	3	3	2	3	2	3	2	3	3	4	3
HSP7C_HUMAN	140	126	138	145	173	174	176	170	178	173	172	188	163	186	171	164
RUVB1_HUMAN	19	23	16	20	23	24	27	27	26	25	22	24	23	27	25	30
PSMD4_HUMAN	10	7	6	6	7	10	9	9	8	10	10	12	13	14	9	6
PSB5_HUMAN	7	4	7	6	7	7	7	10	10	6	8	7	9	7	6	8
VDAC1_HUMAN	35	29	31	34	36	38	37	35	43	37	39	39	44	35	46	34
LDHB_HUMAN	54	38	46	50	49	53	43	56	71	63	60	46	58	61	65	68
PHB2_HUMAN	18	14	22	22	17	25	23	20	27	24	24	23	23	20	25	28
SF01_HUMAN	2	2	2	2	2	3	3	3	4	2	5	2	4	3	4	4
HNRPC_HUMAN	37	29	34	32	37	37	40	32	47	44	37	36	43	44	44	51
IPO5_HUMAN	23	17	16	23	25	25	26	28	28	30	21	24	25	37	26	27
FIGL1_HUMAN	2	2	2	2	3	3	3	2	4	3	3	3	2	3	4	3
U5S1_HUMAN	19	18	17	20	23	21	24	28	31	27	25	19	18	27	25	31
PGK1_HUMAN	105	92	84	118	139	150	145	134	110	103	127	123	115	134	151	121
ACTG_HUMAN	480	510	526	527	638	603	652	593	639	625	609	683	582	607	685	622
ACTB_HUMAN	480	510	526	527	638	603	652	593	639	625	609	683	582	607	685	622
MK09_HUMAN	4	3	4	4	5	5	6	4	6	4	5	5	4	7	7	5
PRS7_HUMAN	14	16	16	13	12	20	18	19	20	19	18	21	16	19	20	15
PSA5_HUMAN	8	6	6	9	8	10	9	10	11	10	11	7	10	9	12	8
VDAC3_HUMAN	17	15	15	14	19	18	15	19	17	19	18	16	18	18	18	18
CLH1_HUMAN	149	111	96	122	162	185	159	143	151	167	154	158	145	164	161	168
RCC2_HUMAN	10	10	13	8	12	7	13	13	16	13	13	10	11	15	14	13
METK2_HUMAN	7	7	7	8	6	8	7	10	14	8	8	7	11	12	10	10
HSP72_HUMAN	47	39	42	49	52	50	56	52	53	53	57	58	55	54	53	51
ATPA_HUMAN	101	63	77	89	82	103	90	85	119	109	95	98	88	96	109	108
ATX10_HUMAN	13	11	11	11	14	15	14	13	16	16	17	16	12	13	15	17
IMB1_HUMAN	31	27	24	23	28	31	31	33	37	33	26	27	36	33	31	31
ENOA_HUMAN	164	148	131	158	156	224	192	211	152	147	189	146	181	200	251	197
ADT1_HUMAN	25	19	21	23	18	29	25	25	27	30	26	22	26	26	31	28
COF2_HUMAN	17	13	18	19	16	21	19	16	22	17	20	18	21	18	20	19
EF1A2_HUMAN	67	63	68	69	77	75	71	81	81	77	79	80	91	78	79	83
ALDR_HUMAN	20	15	19	18	18	23	22	23	23	17	22	20	21	19	24	19
F10A1_HUMAN	11	12	11	13	12	14	13	13	16	16	15	10	14	16	19	15
PGFRA_HUMAN	1	1	1	1	1	1	1	1	2	2	1	2	1	1	1	1
NPM_HUMAN	21	24	22	25	22	19	28	24	36	28	27	23	26	30	35	30
XPP3_HUMAN	5	5	5	5	7	6	5	6	5	5	5	7	6	6	6	6
H90B3_HUMAN	104	96	82	98	102	103	107	98	124	119	99	104	100	113	111	117
PCBP2_HUMAN	19	18	19	17	19	19	21	24	22	17	19	18	18	21	20	24
HS90B_HUMAN	210	198	185	201	212	201	223	202	246	235	197	209	201	224	215	237
UPP1_HUMAN	0	0	0	0	0	0	0	0	0	0	0	0	0	0	0	0
HMOX1_HUMAN	0	0	0	0	0	0	0	0	0	0	0	0	0	0	0	0
CATL2_HUMAN	0	0	0	0	0	0	0	0	0	0	0	0	0	0	0	0
PIN4_HUMAN	0	0	0	0	0	0	0	0	0	0	0	0	0	0	0	0
AMPE_HUMAN	0	0	0	0	0	0	0	0	0	0	0	0	0	0	0	0
FHL2_HUMAN	0	0	0	0	0	0	0	0	0	0	0	0	0	0	0	0
LPP_HUMAN	0	0	0	0	0	0	0	0	0	0	0	0	0	0	0	0
MTDC_HUMAN	0	0	0	0	0	0	0	0	0	0	0	0	0	0	0	0
PEPL_HUMAN	0	0	0	0	0	0	0	0	0	0	0	0	0	0	0	0
DOCK9_HUMAN	0	0	0	0	0	0	0	0	0	0	0	0	0	0	0	0
GALT7_HUMAN	0	0	0	0	0	0	0	0	0	0	0	0	0	0	0	0
ES8L2_HUMAN	0	0	0	0	0	0	0	0	0	0	0	0	0	0	0	0
DSG2_HUMAN	0	0	0	0	0	0	0	0	0	0	0	0	0	0	0	0
CCD58_HUMAN	0	0	0	0	0	0	0	0	0	0	0	0	0	0	0	0
YMEL1_HUMAN	0	0	0	0	0	0	0	0	0	0	0	0	0	0	0	0
TACD2_HUMAN	0	0	0	0	0	0	0	0	0	0	0	0	0	0	0	0
RPAB1_HUMAN	0	0	0	0	0	0	0	0	0	0	0	0	0	0	0	0
PI42C_HUMAN	0	0	0	0	0	0	0	0	0	0	0	0	0	0	0	0
RPC1_HUMAN	0	0	0	0	0	0	0	0	0	0	0	0	0	0	0	0
PAK4_HUMAN	0	0	0	0	0	0	0	0	0	0	0	0	0	0	0	0
NOC3L_HUMAN	0	0	0	0	0	0	0	0	0	0	0	0	0	0	0	0
RPA2_HUMAN	0	0	0	0	0	0	0	0	0	0	0	0	0	0	0	0
ZCCHV_HUMAN	0	0	0	0	0	0	0	0	0	0	0	0	0	0	0	0
RUSD2_HUMAN	0	0	0	0	0	0	0	0	0	0	0	0	0	0	0	0
GET4_HUMAN	0	0	0	0	0	0	0	0	0	0	0	0	0	0	0	0
EIF1B_HUMAN	0	0	0	0	0	0	0	0	0	0	0	0	0	0	0	0
PLS1_HUMAN	0	0	0	0	0	0	0	0	0	0	0	0	0	0	0	0
FACR1_HUMAN	0	0	0	0	0	0	0	0	0	0	0	0	0	0	0	0
CDC23_HUMAN	0	0	0	0	0	0	0	0	0	0	0	0	0	0	0	0
PTTG_HUMAN	0	0	0	0	0	0	0	0	0	0	0	0	0	0	0	0
GSH0_HUMAN	0	0	0	0	0	0	0	0	0	0	0	0	0	0	0	0
ALG8_HUMAN	0	0	0	0	0	0	0	0	0	0	0	0	0	0	0	0
FGF2_HUMAN	0	0	0	0	0	0	0	0	0	0	0	0	0	0	0	0
MA2A1_HUMAN	0	0	0	0	0	0	0	0	0	0	0	0	0	0	0	0
ARMC6_HUMAN	0	0	0	0	0	0	0	0	0	0	0	0	0	0	0	0
DICER_HUMAN	0	0	0	0	0	0	0	0	0	0	0	0	0	0	0	0
PELO_HUMAN	0	0	0	0	0	0	0	0	0	0	0	0	0	0	0	0
TRRAP_HUMAN	0	0	0	0	0	0	0	0	0	0	0	0	0	0	0	0
KANK1_HUMAN	0	0	0	0	0	0	0	0	0	0	0	0	0	0	0	0
CBPD_HUMAN	0	0	0	0	0	0	0	0	0	0	0	0	0	0	0	0
LITD1_HUMAN	0	0	0	0	0	0	0	0	0	0	0	0	0	0	0	0
CTR3_HUMAN	0	0	0	0	0	0	0	0	0	0	0	0	0	0	0	0
NUP54_HUMAN	0	0	0	0	0	0	0	0	0	0	0	0	0	0	0	0
S29A1_HUMAN	0	0	0	0	0	0	0	0	0	0	0	0	0	0	0	0
EXOS8_HUMAN	0	0	0	0	0	0	0	0	0	0	0	0	0	0	0	0
ZMYM3_HUMAN	0	0	0	0	0	0	0	0	0	0	0	0	0	0	0	0
ATM_HUMAN	0	0	0	0	0	0	0	0	0	0	0	0	0	0	0	0
ZO3_HUMAN	0	0	0	0	0	0	0	0	0	0	0	0	0	0	0	0
NALP2_HUMAN	0	0	0	0	0	0	0	0	0	0	0	0	0	0	0	0
PDC10_HUMAN	0	0	0	0	0	0	0	0	0	0	0	0	0	0	0	0
ARFP2_HUMAN	0	0	0	0	0	0	0	0	0	0	0	0	0	0	0	0
DPP9_HUMAN	0	0	0	0	0	0	0	0	0	0	0	0	0	0	0	0
OGFD1_HUMAN	0	0	0	0	0	0	0	0	0	0	0	0	0	0	0	0
RPAB3_HUMAN	0	0	0	0	0	0	0	0	0	0	0	0	0	0	0	0
EMC7_HUMAN	0	0	0	0	0	0	0	0	0	0	0	0	0	0	0	0
UCK2_HUMAN	0	0	0	0	0	0	0	0	0	0	0	0	0	0	0	0
SMC1B_HUMAN	0	0	0	0	0	0	0	0	0	0	0	0	0	0	0	0
GNL3L_HUMAN	0	0	0	0	0	0	0	0	0	0	0	0	0	0	0	0
BUB1B_HUMAN	0	0	0	0	0	0	0	0	0	0	0	0	0	0	0	0
KRI1_HUMAN	0	0	0	0	0	0	0	0	0	0	0	0	0	0	0	0
SBNO1_HUMAN	0	0	0	0	0	0	0	0	0	0	0	0	0	0	0	0
ZN121_HUMAN	0	0	0	0	0	0	0	0	0	0	0	0	0	0	0	0
CDA7L_HUMAN	0	0	0	0	0	0	0	0	0	0	0	0	0	0	0	0
IWS1_HUMAN	0	0	0	0	0	0	0	0	0	0	0	0	0	0	0	0
ACSL5_HUMAN	0	0	0	0	0	0	0	0	0	0	0	0	0	0	0	0
PRC2B_HUMAN	0	0	0	0	0	0	0	0	0	0	0	0	0	0	0	0
TIM_HUMAN	0	0	0	0	0	0	0	0	0	0	0	0	0	0	0	0
ECT2_HUMAN	0	0	0	0	0	0	0	0	0	0	0	0	0	0	0	0
PTSS1_HUMAN	0	0	0	0	0	0	0	0	0	0	0	0	0	0	0	0
LAR4B_HUMAN	0	0	0	0	0	0	0	0	0	0	0	0	0	0	0	0
UBE2T_HUMAN	0	0	0	0	0	0	0	0	0	0	0	0	0	0	0	0
SREK1_HUMAN	0	0	0	0	0	0	0	0	0	0	0	0	0	0	0	0
5NTD_HUMAN	0	0	0	0	0	0	0	0	0	0	0	0	0	0	0	0
MAOX_HUMAN	0	0	0	0	0	0	0	0	0	0	0	0	0	0	0	0
MDR1_HUMAN	0	0	0	0	0	0	0	0	0	0	0	0	0	0	0	0
NHRF3_HUMAN	0	0	0	0	0	0	0	0	0	0	0	0	0	0	0	0
DAB2_HUMAN	0	0	0	0	0	0	0	0	0	0	0	0	0	0	0	0
LRC15_HUMAN	0	0	0	0	0	0	0	0	0	0	0	0	0	0	0	0
CAV1_HUMAN	0	0	0	0	0	0	0	0	0	0	0	0	0	0	0	0
THIK_HUMAN	0	0	0	0	0	0	0	0	0	0	0	0	0	0	0	0
LAD1_HUMAN	0	0	0	0	0	0	0	0	0	0	0	0	0	0	0	0
ITA11_HUMAN	0	0	0	0	0	0	0	0	0	0	0	0	0	0	0	0
CAVN3_HUMAN	0	0	0	0	0	0	0	0	0	0	0	0	0	0	0	0
PLPP3_HUMAN	0	0	0	0	0	0	0	0	0	0	0	0	0	0	0	0
RFTN1_HUMAN	0	0	0	0	0	0	0	0	0	0	0	0	0	0	0	0
AHNK2_HUMAN	0	0	0	0	0	0	0	0	0	0	0	0	0	0	0	0
EPS8_HUMAN	0	0	0	0	0	0	0	0	0	0	0	0	0	0	0	0
VPP3_HUMAN	0	0	0	0	0	0	0	0	0	0	0	0	0	0	0	0
ACTL8_HUMAN	0	0	0	0	0	0	0	0	0	0	0	0	0	0	0	0
SEPR_HUMAN	0	0	0	0	0	0	0	0	0	0	0	0	0	0	0	0
FND3B_HUMAN	0	0	0	0	0	0	0	0	0	0	0	0	0	0	0	0
EST1_HUMAN	0	0	0	0	0	0	0	0	0	0	0	0	0	0	0	0
UD16_HUMAN	0	0	0	0	0	0	0	0	0	0	0	0	0	0	0	0
MX1_HUMAN	0	0	0	0	0	0	0	0	0	0	0	0	0	0	0	0
VTDB_HUMAN	0	0	0	0	0	0	0	0	0	0	0	0	0	0	0	0
SPEB_HUMAN	0	0	0	0	0	0	0	0	0	0	0	0	0	0	0	0
MPRIP_HUMAN	0	0	0	0	0	0	0	0	0	0	0	0	0	0	0	0
EGLN_HUMAN	0	0	0	0	0	0	0	0	0	0	0	0	0	0	0	0
LMOD1_HUMAN	0	0	0	0	0	0	0	0	0	0	0	0	0	0	0	0
APOA1_HUMAN	0	0	0	0	0	0	0	0	0	0	0	0	0	0	0	0
DOC10_HUMAN	0	0	0	0	0	0	0	0	0	0	0	0	0	0	0	0
GALT6_HUMAN	0	0	0	0	0	0	0	0	0	0	0	0	0	0	0	0
LPXN_HUMAN	0	0	0	0	0	0	0	0	0	0	0	0	0	0	0	0
PNPO_HUMAN	0	0	0	0	0	0	0	0	0	0	0	0	0	0	0	0
LYOX_HUMAN	0	0	0	0	0	0	0	0	0	0	0	0	0	0	0	0
STING_HUMAN	0	0	0	0	0	0	0	0	0	0	0	0	0	0	0	0
SOAT1_HUMAN	0	0	0	0	0	0	0	0	0	0	0	0	0	0	0	0
IL18_HUMAN	0	0	0	0	0	0	0	0	0	0	0	0	0	0	0	0
ITIH3_HUMAN	0	0	0	0	0	0	0	0	0	0	0	0	0	0	0	0
NEUR1_HUMAN	0	0	0	0	0	0	0	0	0	0	0	0	0	0	0	0
MBOA5_HUMAN	0	0	0	0	0	0	0	0	0	0	0	0	0	0	0	0
POF1B_HUMAN	0	0	0	0	0	0	0	0	0	0	0	0	0	0	0	0
WNT2B_HUMAN	0	0	0	0	0	0	0	0	0	0	0	0	0	0	0	0
PHS_HUMAN	0	0	0	0	0	0	0	0	0	0	0	0	0	0	0	0
GREM1_HUMAN	0	0	0	0	0	0	0	0	0	0	0	0	0	0	0	0
S10AE_HUMAN	0	0	0	0	0	0	0	0	0	0	0	0	0	0	0	0
SPRE_HUMAN	0	0	0	0	0	0	0	0	0	0	0	0	0	0	0	0
SNG2_HUMAN	0	0	0	0	0	0	0	0	0	0	0	0	0	0	0	0
PTX3_HUMAN	0	0	0	0	0	0	0	0	0	0	0	0	0	0	0	0
CB072_HUMAN	0	0	0	0	0	0	0	0	0	0	0	0	0	0	0	0
CD151_HUMAN	0	0	0	0	0	0	0	0	0	0	0	0	0	0	0	0
AN13A_HUMAN	0	0	0	0	0	0	0	0	0	0	0	0	0	0	0	0
BAG3_HUMAN	0	0	0	0	0	0	0	0	0	0	0	0	0	0	0	0
GT253_HUMAN	0	0	0	0	0	0	0	0	0	0	0	0	0	0	0	0
SYNCI_HUMAN	0	0	0	0	0	0	0	0	0	0	0	0	0	0	0	0
HGD_HUMAN	0	0	0	0	0	0	0	0	0	0	0	0	0	0	0	0
PRSR2_HUMAN	0	0	0	0	0	0	0	0	0	0	0	0	0	0	0	0
ENDD1_HUMAN	0	0	0	0	0	0	0	0	0	0	0	0	0	0	0	0
ITIH2_HUMAN	0	0	0	0	0	0	0	0	0	0	0	0	0	0	0	0
CCD80_HUMAN	0	0	0	0	0	0	0	0	0	0	0	0	0	0	0	0
ATG7_HUMAN	0	0	0	0	0	0	0	0	0	0	0	0	0	0	0	0
PALM3_HUMAN	0	0	0	0	0	0	0	0	0	0	0	0	0	0	0	0
ICAM1_HUMAN	0	0	0	0	0	0	0	0	0	0	0	0	0	0	0	0
CP27A_HUMAN	0	0	0	0	0	0	0	0	0	0	0	0	0	0	0	0
MISP_HUMAN	0	0	0	0	0	0	0	0	0	0	0	0	0	0	0	0
TRPV2_HUMAN	0	0	0	0	0	0	0	0	0	0	0	0	0	0	0	0
NFAC2_HUMAN	0	0	0	0	0	0	0	0	0	0	0	0	0	0	0	0
S14L2_HUMAN	0	0	0	0	0	0	0	0	0	0	0	0	0	0	0	0
CRBG2_HUMAN	0	0	0	0	0	0	0	0	0	0	0	0	0	0	0	0
GALT3_HUMAN	0	0	0	0	0	0	0	0	0	0	0	0	0	0	0	0
KISHA_HUMAN	0	0	0	0	0	0	0	0	0	0	0	0	0	0	0	0
CLD11_HUMAN	0	0	0	0	0	0	0	0	0	0	0	0	0	0	0	0
COX20_HUMAN	0	0	0	0	0	0	0	0	0	0	0	0	0	0	0	0
CHCH2_HUMAN	0	0	0	0	0	0	0	0	0	0	0	0	0	0	0	0
TM119_HUMAN	0	0	0	0	0	0	0	0	0	0	0	0	0	0	0	0
RAB32_HUMAN	0	0	0	0	0	0	0	0	0	0	0	0	0	0	0	0
HMGCL_HUMAN	0	0	0	0	0	0	0	0	0	0	0	0	0	0	0	0
HSPB7_HUMAN	0	0	0	0	0	0	0	0	0	0	0	0	0	0	0	0
MET7B_HUMAN	0	0	0	0	0	0	0	0	0	0	0	0	0	0	0	0
MGAT2_HUMAN	0	0	0	0	0	0	0	0	0	0	0	0	0	0	0	0
TGON2_HUMAN	0	0	0	0	0	0	0	0	0	0	0	0	0	0	0	0
TF_HUMAN	0	0	0	0	0	0	0	0	0	0	0	0	0	0	0	0
ATG3_HUMAN	0	0	0	0	0	0	0	0	0	0	0	0	0	0	0	0
TNR6_HUMAN	0	0	0	0	0	0	0	0	0	0	0	0	0	0	0	0
YIPF4_HUMAN	0	0	0	0	0	0	0	0	0	0	0	0	0	0	0	0
SPHK1_HUMAN	0	0	0	0	0	0	0	0	0	0	0	0	0	0	0	0
MGMT_HUMAN	0	0	0	0	0	0	0	0	0	0	0	0	0	0	0	0
SYAP1_HUMAN	0	0	0	0	0	0	0	0	0	0	0	0	0	0	0	0
RAB23_HUMAN	0	0	0	0	0	0	0	0	0	0	0	0	0	0	0	0
SPP2A_HUMAN	0	0	0	0	0	0	0	0	0	0	0	0	0	0	0	0
IPP2_HUMAN	0	0	0	0	0	0	0	0	0	0	0	0	0	0	0	0
RFIP5_HUMAN	0	0	0	0	0	0	0	0	0	0	0	0	0	0	0	0
COPZ2_HUMAN	0	0	0	0	0	0	0	0	0	0	0	0	0	0	0	0
MAVS_HUMAN	0	0	0	0	0	0	0	0	0	0	0	0	0	0	0	0
PPM1H_HUMAN	0	0	0	0	0	0	0	0	0	0	0	0	0	0	0	0
SH24A_HUMAN	0	0	0	0	0	0	0	0	0	0	0	0	0	0	0	0
IPP2B_HUMAN	0	0	0	0	0	0	0	0	0	0	0	0	0	0	0	0
AGFG2_HUMAN	0	0	0	0	0	0	0	0	0	0	0	0	0	0	0	0
APOL2_HUMAN	0	0	0	0	0	0	0	0	0	0	0	0	0	0	0	0
NENF_HUMAN	0	0	0	0	0	0	0	0	0	0	0	0	0	0	0	0
NCEH1_HUMAN	0	0	0	0	0	0	0	0	0	0	0	0	0	0	0	0
WASH2_HUMAN	0	0	0	0	0	0	0	0	0	0	0	0	0	0	0	0
VINEX_HUMAN	0	0	0	0	0	0	0	0	0	0	0	0	0	0	0	0
HNF4A_HUMAN	0	0	0	0	0	0	0	0	0	0	0	0	0	0	0	0
AUP1_HUMAN	0	0	0	0	0	0	0	0	0	0	0	0	0	0	0	0
IBP3_HUMAN	0	0	0	0	0	0	0	0	0	0	0	0	0	0	0	0
ECHP_HUMAN	0	0	0	0	0	0	0	0	0	0	0	0	0	0	0	0
NFKB1_HUMAN	0	0	0	0	0	0	0	0	0	0	0	0	0	0	0	0
HEXI1_HUMAN	0	0	0	0	0	0	0	0	0	0	0	0	0	0	0	0
MICU2_HUMAN	0	0	0	0	0	0	0	0	0	0	0	0	0	0	0	0
SMYD2_HUMAN	0	0	0	0	0	0	0	0	0	0	0	0	0	0	0	0
MCP_HUMAN	0	0	0	0	0	0	0	0	0	0	0	0	0	0	0	0
ITA3_HUMAN	0	0	0	0	0	0	0	0	0	0	0	0	0	0	0	0
CP1B1_HUMAN	0	0	0	0	0	0	0	0	0	0	0	0	0	0	0	0
BAIP2_HUMAN	0	0	0	0	0	0	0	0	0	0	0	0	0	0	0	0
NFKB2_HUMAN	0	0	0	0	0	0	0	0	0	0	0	0	0	0	0	0
BICC1_HUMAN	0	0	0	0	0	0	0	0	0	0	0	0	0	0	0	0
SPIT1_HUMAN	0	0	0	0	0	0	0	0	0	0	0	0	0	0	0	0
DRS7B_HUMAN	0	0	0	0	0	0	0	0	0	0	0	0	0	0	0	0
GATA6_HUMAN	0	0	0	0	0	0	0	0	0	0	0	0	0	0	0	0
TAP1_HUMAN	0	0	0	0	0	0	0	0	0	0	0	0	0	0	0	0
MRP4_HUMAN	0	0	0	0	0	0	0	0	0	0	0	0	0	0	0	0
DNJC1_HUMAN	0	0	0	0	0	0	0	0	0	0	0	0	0	0	0	0
TRI16_HUMAN	0	0	0	0	0	0	0	0	0	0	0	0	0	0	0	0
CHDH_HUMAN	0	0	0	0	0	0	0	0	0	0	0	0	0	0	0	0
SLFN5_HUMAN	0	0	0	0	0	0	0	0	0	0	0	0	0	0	0	0
TACC1_HUMAN	0	0	0	0	0	0	0	0	0	0	0	0	0	0	0	0
RRFM_HUMAN	0	0	0	0	0	0	0	0	0	0	0	0	0	0	0	0
TBCD5_HUMAN	0	0	0	0	0	0	0	0	0	0	0	0	0	0	0	0
SEM7A_HUMAN	0	0	0	0	0	0	0	0	0	0	0	0	0	0	0	0
PPCS_HUMAN	0	0	0	0	0	0	0	0	0	0	0	0	0	0	0	0
ZGPAT_HUMAN	0	0	0	0	0	0	0	0	0	0	0	0	0	0	0	0
AGFG1_HUMAN	0	0	0	0	0	0	0	0	0	0	0	0	0	0	0	0
FBX7_HUMAN	0	0	0	0	0	0	0	0	0	0	0	0	0	0	0	0
MPP7_HUMAN	0	0	0	0	0	0	0	0	0	0	0	0	0	0	0	0
NUFP2_HUMAN	0	0	0	0	0	0	0	0	0	0	0	0	0	0	0	0
GSE1_HUMAN	0	0	0	0	0	0	0	0	0	0	0	0	0	0	0	0
UBP22_HUMAN	0	0	0	0	0	0	0	0	0	0	0	0	0	0	0	0
DEN4C_HUMAN	0	0	0	0	0	0	0	0	0	0	0	0	0	0	0	0
NADE_HUMAN	0	0	0	0	0	0	0	0	0	0	0	0	0	0	0	0
RAPH1_HUMAN	0	0	0	0	0	0	0	0	0	0	0	0	0	0	0	0
MALT1_HUMAN	0	0	0	0	0	0	0	0	0	0	0	0	0	0	0	0
PLPP2_HUMAN	0	0	0	0	0	0	0	0	0	0	0	0	0	0	0	0
PRC2A_HUMAN	0	0	0	0	0	0	0	0	0	0	0	0	0	0	0	0
REN3B_HUMAN	0	0	0	0	0	0	0	0	0	0	0	0	0	0	0	0
SPIT2_HUMAN	0	0	0	0	0	0	0	0	0	0	0	0	0	0	0	0
FLVC1_HUMAN	0	0	0	0	0	0	0	0	0	0	0	0	0	0	0	0
ARMX1_HUMAN	0	0	0	0	0	0	0	0	0	0	0	0	0	0	0	0
ZN687_HUMAN	0	0	0	0	0	0	0	0	0	0	0	0	0	0	0	0
S39AE_HUMAN	0	0	0	0	0	0	0	0	0	0	0	0	0	0	0	0
KLHL7_HUMAN	0	0	0	0	0	0	0	0	0	0	0	0	0	0	0	0
DIDO1_HUMAN	0	0	0	0	0	0	0	0	0	0	0	0	0	0	0	0
RU1C_HUMAN	0	0	0	0	0	0	0	0	0	0	0	0	0	0	0	0
DR4L1_HUMAN	0	0	0	0	0	0	0	0	0	0	0	0	0	0	0	0
TRABD_HUMAN	0	0	0	0	0	0	0	0	0	0	0	0	0	0	0	0
SPA5L_HUMAN	0	0	0	0	0	0	0	0	0	0	0	0	0	0	0	0
ZN532_HUMAN	0	0	0	0	0	0	0	0	0	0	0	0	0	0	0	0
CERS2_HUMAN	0	0	0	0	0	0	0	0	0	0	0	0	0	0	0	0
LTN1_HUMAN	0	0	0	0	0	0	0	0	0	0	0	0	0	0	0	0
TBCD4_HUMAN	0	0	0	0	0	0	0	0	0	0	0	0	0	0	0	0
ITPK1_HUMAN	0	0	0	0	0	0	0	0	0	0	0	0	0	0	0	0
EPHA1_HUMAN	0	0	0	0	0	0	0	0	0	0	0	0	0	0	0	0
TCOF_HUMAN	0	0	0	0	0	0	0	0	0	0	0	0	0	0	0	0
RHN2P_HUMAN	0	0	0	0	0	0	0	0	0	0	0	0	0	0	0	0
PFD4_HUMAN	0	0	0	0	0	0	0	0	0	0	0	0	0	0	0	0
RHPN2_HUMAN	0	0	0	0	0	0	0	0	0	0	0	0	0	0	0	0
TOX4_HUMAN	0	0	0	0	0	0	0	0	0	0	0	0	0	0	0	0
MAP7_HUMAN	0	0	0	0	0	0	0	0	0	0	0	0	0	0	0	0
ATRAP_HUMAN	0	0	0	0	0	0	0	0	0	0	0	0	0	0	0	0
S10A4_HUMAN	0	0	0	0	0	0	0	0	0	0	0	0	0	0	0	0
NADAP_HUMAN	0	0	0	0	0	0	0	0	0	0	0	0	0	0	0	0
SCAFB_HUMAN	0	0	0	0	0	0	0	0	0	0	0	0	0	0	0	0
AKAP1_HUMAN	0	0	0	0	0	0	0	0	0	0	0	0	0	0	0	0
CY24A_HUMAN	0	0	0	0	0	0	0	0	0	0	0	0	0	0	0	0
NFU1_HUMAN	0	0	0	0	0	0	0	0	0	0	0	0	0	0	0	0
RL37_HUMAN	0	0	0	0	0	0	0	0	0	0	0	0	0	0	0	0
BI2L1_HUMAN	0	0	0	0	0	0	0	0	0	0	0	0	0	0	0	0
UHRF1_HUMAN	0	0	0	0	0	0	0	0	0	0	0	0	0	0	0	0
NOP14_HUMAN	0	0	0	0	0	0	0	0	0	0	0	0	0	0	0	0
LMO7_HUMAN	0	0	0	0	0	0	0	0	0	0	0	0	0	0	0	0
PROM1_HUMAN	0	0	0	0	0	0	0	0	0	0	0	0	0	0	0	0
RFIP1_HUMAN	0	0	0	0	0	0	0	0	0	0	0	0	0	0	0	0
OAS3_HUMAN	0	0	0	0	0	0	0	0	0	0	0	0	0	0	0	0
FIL1L_HUMAN	0	0	0	0	0	0	0	0	0	0	0	0	0	0	0	0
YIPF3_HUMAN	0	0	0	0	0	0	0	0	0	0	0	0	0	0	0	0
RRP8_HUMAN	0	0	0	0	0	0	0	0	0	0	0	0	0	0	0	0
TFB2M_HUMAN	0	0	0	0	0	0	0	0	0	0	0	0	0	0	0	0
CD109_HUMAN	0	0	0	0	0	0	0	0	0	0	0	0	0	0	0	0
MAGI1_HUMAN	0	0	0	0	0	0	0	0	0	0	0	0	0	0	0	0
NLE1_HUMAN	0	0	0	0	0	0	0	0	0	0	0	0	0	0	0	0
GPT_HUMAN	0	0	0	0	0	0	0	0	0	0	0	0	0	0	0	0
MYD88_HUMAN	0	0	0	0	0	0	0	0	0	0	0	0	0	0	0	0
PATL1_HUMAN	0	0	0	0	0	0	0	0	0	0	0	0	0	0	0	0
TASOR_HUMAN	0	0	0	0	0	0	0	0	0	0	0	0	0	0	0	0
IREB2_HUMAN	0	0	0	0	0	0	0	0	0	0	0	0	0	0	0	0
NELFA_HUMAN	0	0	0	0	0	0	0	0	0	0	0	0	0	0	0	0
FADS1_HUMAN	0	0	0	0	0	0	0	0	0	0	0	0	0	0	0	0
SDF2L_HUMAN	0	0	0	0	0	0	0	0	0	0	0	0	0	0	0	0
C19L1_HUMAN	0	0	0	0	0	0	0	0	0	0	0	0	0	0	0	0
GALT5_HUMAN	0	0	0	0	0	0	0	0	0	0	0	0	0	0	0	0
ERAP2_HUMAN	0	0	0	0	0	0	0	0	0	0	0	0	0	0	0	0
P4K2A_HUMAN	0	0	0	0	0	0	0	0	0	0	0	0	0	0	0	0
EFTS_HUMAN	0	0	0	0	0	0	0	0	0	0	0	0	0	0	0	0
MGAT1_HUMAN	0	0	0	0	0	0	0	0	0	0	0	0	0	0	0	0
CLCN7_HUMAN	0	0	0	0	0	0	0	0	0	0	0	0	0	0	0	0
DDX58_HUMAN	0	0	0	0	0	0	0	0	0	0	0	0	0	0	0	0
CP2S1_HUMAN	0	0	0	0	0	0	0	0	0	0	0	0	0	0	0	0
ASCC2_HUMAN	0	0	0	0	0	0	0	0	0	0	0	0	0	0	0	0
AGAL_HUMAN	0	0	0	0	0	0	0	0	0	0	0	0	0	0	0	0
GLMN_HUMAN	0	0	0	0	0	0	0	0	0	0	0	0	0	0	0	0
BMS1_HUMAN	0	0	0	0	0	0	0	0	0	0	0	0	0	0	0	0
BYST_HUMAN	0	0	0	0	0	0	0	0	0	0	0	0	0	0	0	0
WDR3_HUMAN	0	0	0	0	0	0	0	0	0	0	0	0	0	0	0	0
DDX56_HUMAN	0	0	0	0	0	0	0	0	0	0	0	0	0	0	0	0
DDX20_HUMAN	0	0	0	0	0	0	0	0	0	0	0	0	0	0	0	0
RPA1_HUMAN	0	0	0	0	0	0	0	0	0	0	0	0	0	0	0	0
FBLI1_HUMAN	0	0	0	0	0	0	0	0	0	0	0	0	0	0	0	0
NSUN5_HUMAN	0	0	0	0	0	0	0	0	0	0	0	0	0	0	0	0
PDLI1_HUMAN	0	0	0	0	0	0	0	0	0	0	0	0	0	0	0	0
DLGP5_HUMAN	0	0	0	0	0	0	0	0	0	0	0	0	0	0	0	0
ABCF2_HUMAN	0	0	0	0	0	0	0	0	0	0	0	0	0	0	0	0
MK67I_HUMAN	0	0	0	0	0	0	0	0	0	0	0	0	0	0	0	0
UTP4_HUMAN	0	0	0	0	0	0	0	0	0	0	0	0	0	0	0	0
INT13_HUMAN	0	0	0	0	0	0	0	0	0	0	0	0	0	0	0	0
HEAT3_HUMAN	0	0	0	0	0	0	0	0	0	0	0	0	0	0	0	0
[truncated: 2,223 more rows]
